# Supplementary material for: NFE2L3 Inhibition Induces Cell Cycle Arrest at the G0/G1 Phase in Colorectal Cancer Cells through Downregulating CCND1 and pRb1-ser807/811
Source: Dis Markers. 2019 May 5;2019:2829798. doi: 10.1155/2019/2829798 (PMC6525936; doi:10.1155/2019/2829798)
Supplement: Supplementary 3 — Table S2: 1579 upregulated genes and 3218 downregulated genes in colorectal cancer samples. [file 2829798.f3.xlsx]

## Sheet: 1579 up-regulated genes
gene	logFC	AveExpr	t	P.Value	adj.P.Val	B
CDH3	6.24706	2.42913	44.4617	6.42972e-163	1.32002e-158	361.627
KRT80	6.61205	-1.11253	39.0948	1.1808e-143	6.06045e-140	317.595
ETV4	5.46552	7.47688	37.8083	8.24443e-139	2.41797e-135	306.512
ESM1	5.53557	-1.42668	34.6228	1.97784e-126	5.07563e-123	278.169
JUB	2.96822	5.35407	29.5411	1.49782e-105	1.61843e-102	230.321
MTHFD1L	2.41724	0.87698	29.4382	4.09288e-105	4.20134e-102	229.32
KIAA1199	5.4089	3.1622	28.6912	6.25837e-102	4.58873e-99	222.018
FOXQ1	6.04286	0.902022	28.5137	3.60402e-101	2.5514e-98	220.275
CLDN1	4.82283	-0.229993	28.2619	4.349e-100	2.97617e-97	217.794
LOC92659	2.8604	-3.47914	27.8947	1.66256e-98	1.00932e-95	214.166
NFE2L3	2.70141	-0.397795	26.3691	7.20872e-92	3.52369e-89	198.943
C6orf223	5.15741	-2.04072	26.1063	1.02564e-90	4.78555e-88	196.298
LRP8	3.28389	4.81655	25.8426	1.4813e-89	6.75803e-87	193.638
TEAD4	2.24649	0.935604	25.6457	1.09196e-88	4.67039e-86	191.647
GRIN2D	4.88112	7.20532	25.5138	4.17163e-88	1.67929e-85	190.312
TRIB3	3.5398	4.93371	25.4112	1.18386e-87	4.50087e-85	189.273
WNT2	5.25842	-3.21242	25.3464	2.28908e-87	8.54451e-85	188.616
SPTBN2	3.23759	3.0717	25.2897	4.07678e-87	1.49458e-84	188.041
PDX1	4.64879	0.878093	25.1023	2.75299e-86	9.74464e-84	186.138
LRRC8E	2.7588	1.71703	25.0166	6.60305e-86	2.25934e-83	185.267
OSBPL3	1.95483	0.0920835	24.8574	3.35254e-85	1.0925e-82	183.648
SLCO4A1	3.28178	3.1258	24.6433	2.99292e-84	9.45303e-82	181.467
ENC1	2.00477	6.71395	24.0906	8.64681e-82	2.50027e-79	175.821
TTC26	1.9931	-0.219444	23.7862	1.97689e-80	5.27085e-78	172.703
ANLN	2.23901	7.09475	23.6602	7.23559e-80	1.85683e-77	171.41
GTF2IRD1	2.16673	1.89211	23.4978	3.85398e-79	9.64906e-77	169.743
PRSS22	4.31517	4.20461	23.2436	5.30368e-78	1.22342e-75	167.131
PVT1	2.64311	-2.69082	22.778	6.51217e-76	1.28553e-73	162.338
MDFI	3.44579	5.90321	22.7705	7.03412e-76	1.37534e-73	162.261
SLC7A5	2.96408	0.508019	22.7526	8.46416e-76	1.63933e-73	162.076
TRIP13	2.20148	7.1616	22.4889	1.29673e-74	2.31494e-72	159.357
PPAT	1.67658	0.437713	22.4847	1.35529e-74	2.39864e-72	159.313
EPHX4	4.37657	5.37994	22.3826	3.90176e-74	6.84642e-72	158.259
KIAA1549	2.41153	-1.64835	22.3435	5.85103e-74	1.00942e-71	157.855
WDR75	1.18092	2.36982	22.3285	6.8284e-74	1.16823e-71	157.702
C17orf96	3.38085	2.85721	22.2173	2.16241e-73	3.55155e-71	156.553
CBFB	1.33904	-0.514019	22.2003	2.57896e-73	4.20207e-71	156.377
DDX31	1.19951	3.29404	22.1265	5.54061e-73	8.95659e-71	155.615
TNFRSF12A	2.58237	8.06049	21.9293	4.28371e-72	6.61238e-70	153.577
DNAJC2	1.45794	0.995193	21.8707	7.8662e-72	1.19625e-69	152.972
BYSL	1.47173	3.25796	21.7717	2.19786e-71	3.29358e-69	151.948
NOP58	1.42023	2.78822	21.675	5.9987e-71	8.85995e-69	150.947
CBX8	1.70507	3.17881	21.3919	1.13344e-69	1.5938e-67	148.019
TMEM206	1.53527	-2.84192	21.3556	1.65394e-69	2.3099e-67	147.642
SPATA12	2.64538	-3.33561	21.3017	2.89412e-69	3.96109e-67	147.085
DKC1	1.54605	1.92034	21.2962	3.06232e-69	4.16354e-67	147.029
NOP2	1.49777	4.28355	21.2279	6.23147e-69	8.30728e-67	146.321
CPNE7	5.10081	3.38076	21.2246	6.44738e-69	8.53966e-67	146.287
PUS7	1.74001	4.74635	21.1562	1.3116e-68	1.6755e-66	145.579
PRR7	2.64005	-3.72314	21.0659	3.35218e-68	4.2221e-66	144.644
RRP12	1.51526	8.33128	20.9923	7.19902e-68	8.90337e-66	143.882
SLC39A10	1.79463	6.07451	20.9617	9.89812e-68	1.21682e-65	143.565
PLEKHN1	3.51701	4.24457	20.8863	2.16747e-67	2.63303e-65	142.784
GTPBP4	1.2086	-0.255975	20.8713	2.53378e-67	3.05991e-65	142.629
PYCR1	1.74544	2.38751	20.7881	6.01006e-67	7.17364e-65	141.768
WDR43	1.27717	8.72889	20.6033	4.10377e-66	4.70672e-64	139.854
FUT1	2.52351	-2.87674	20.5785	5.31167e-66	5.99168e-64	139.597
CBX2	3.55024	-0.999999	20.5419	7.76985e-66	8.66929e-64	139.218
RUVBL1	1.31098	-1.07314	20.4842	1.41456e-65	1.54473e-63	138.621
PPM1H	2.16288	4.29803	20.4087	3.09984e-65	3.33192e-63	137.839
C10orf2	1.5303	6.4605	20.4073	3.1471e-65	3.3651e-63	137.824
XRCC2	2.17854	-4.10752	20.3576	5.27153e-65	5.60749e-63	137.31
SLC6A6	2.94768	4.33933	20.3467	5.90584e-65	6.24984e-63	137.197
HSP90AB1	1.16216	11.6931	20.3382	6.45276e-65	6.75894e-63	137.109
MMP7	6.94179	1.31251	20.3324	6.85062e-65	7.10319e-63	137.049
TPX2	2.01966	9.46879	20.3219	7.63677e-65	7.87854e-63	136.941
TFAP4	1.45013	3.37068	20.3148	8.2228e-65	8.4407e-63	136.867
ECT2	1.8288	7.95225	20.2702	1.30695e-64	1.33491e-62	136.405
RBM28	1.36614	0.681377	20.2487	1.6347e-64	1.66141e-62	136.182
GYLTL1B	4.23751	7.25965	20.1978	2.77516e-64	2.77922e-62	135.655
NEBL	2.28733	8.57642	20.1961	2.82329e-64	2.81369e-62	135.638
ACAN	3.82704	5.92989	20.0291	1.60051e-63	1.51421e-61	133.909
C19orf28	1.43588	-0.374046	19.9813	2.63044e-63	2.45468e-61	133.414
PAQR4	1.78279	-0.0849864	19.9255	4.69375e-63	4.3212e-61	132.837
S100A11	1.79084	6.78168	19.8673	8.58896e-63	7.83695e-61	132.235
KIF14	2.12943	1.39013	19.8009	1.7115e-62	1.5411e-60	131.548
MACC1	2.45081	4.09234	19.7559	2.7317e-62	2.43834e-60	131.082
SOX9	1.99478	2.34182	19.6747	6.35002e-62	5.5951e-60	130.242
CST1	6.8684	-0.499738	19.6169	1.15694e-61	1.01072e-59	129.644
ZMYND19	1.32565	-2.13164	19.6129	1.20592e-61	1.04905e-59	129.603
TEX10	1.15527	7.59809	19.6026	1.34109e-61	1.16171e-59	129.497
PALB2	1.00835	3.13328	19.556	2.17638e-61	1.8695e-59	129.015
METTL1	1.37484	5.37053	19.5553	2.19113e-61	1.87433e-59	129.008
DDN	3.88903	-3.18712	19.5343	2.72668e-61	2.32277e-59	128.79
XPO5	1.28426	0.541446	19.5261	2.96786e-61	2.51778e-59	128.705
QSOX2	1.34985	7.58415	19.4952	4.08861e-61	3.42609e-59	128.386
POLR1B	1.17484	0.332189	19.4105	9.84619e-61	8.11816e-59	127.511
C20orf20	1.57302	0.536585	19.3923	1.18904e-60	9.7255e-59	127.323
INHBA	4.72129	2.46732	19.3452	1.93748e-60	1.57219e-58	126.836
CCT6A	1.16973	3.13044	19.2953	3.25161e-60	2.59749e-58	126.32
MET	1.80412	1.15186	19.2713	4.17198e-60	3.29426e-58	126.072
MKI67IP	1.13179	-0.84446	19.2575	4.8109e-60	3.7842e-58	125.93
KAT2A	1.4852	1.5678	19.2527	5.0564e-60	3.96213e-58	125.881
HJURP	1.77327	5.97799	19.2056	8.23787e-60	6.33421e-58	125.394
VWA2	3.97594	0.517807	19.1817	1.05637e-59	8.00267e-58	125.146
C1orf135	2.17803	5.49871	19.1459	1.5302e-59	1.15497e-57	124.777
CCDC86	1.38	8.12327	19.1452	1.5416e-59	1.1593e-57	124.77
ORC6L	2.02916	-3.3239	19.0764	3.14556e-59	2.33134e-57	124.059
COL11A1	6.39138	-2.15392	19.0122	6.11211e-59	4.4497e-57	123.398
CGREF1	3.46468	5.33639	18.9935	7.42348e-59	5.36634e-57	123.204
GNL3	1.22553	7.84034	18.9766	8.83684e-59	6.34337e-57	123.03
CBX3	1.28169	-1.09019	18.9737	9.11216e-59	6.51821e-57	123
GARS	1.24778	9.01378	18.9643	1.00429e-58	7.13431e-57	122.903
SKA3	2.11684	3.13084	18.8782	2.4491e-58	1.72192e-56	122.015
CEP72	2.0446	1.51912	18.8361	3.78684e-58	2.63538e-56	121.581
NOB1	1.1284	1.97872	18.8054	5.20265e-58	3.57226e-56	121.264
SALL4	4.12569	-2.52344	18.7175	1.29186e-57	8.61097e-56	120.358
RAD54B	2.01004	5.60826	18.7131	1.35142e-57	8.97886e-56	120.313
CD3EAP	1.37151	-2.28786	18.676	1.98441e-57	1.29333e-55	119.93
SIM2	3.73881	-1.69647	18.6622	2.28917e-57	1.48723e-55	119.788
C7orf68	2.19671	-0.47238	18.6232	3.42617e-57	2.21193e-55	119.386
URB2	1.24055	-0.51455	18.6011	4.30521e-57	2.7449e-55	119.159
DDX10	1.16231	6.00953	18.5602	6.57112e-57	4.16374e-55	118.738
BRIX1	1.26859	2.5064	18.5517	7.17146e-57	4.53015e-55	118.65
TMEM132A	2.29368	7.1084	18.5316	8.82946e-57	5.54339e-55	118.443
NKRF	1.40037	-0.795432	18.521	9.84551e-57	6.14372e-55	118.335
C5orf34	1.71578	-3.54197	18.5132	1.06791e-56	6.62365e-55	118.254
GABRD	2.53083	-0.534909	18.5078	1.12816e-56	6.97627e-55	118.199
CSE1L	1.53139	3.78451	18.4951	1.28748e-56	7.91376e-55	118.068
RHPN1	2.83676	-0.147169	18.454	1.96747e-56	1.20573e-54	117.645
ATP11A	2.06222	-0.181596	18.3909	3.77476e-56	2.26596e-54	116.996
CDC25B	2.07539	4.88965	18.3882	3.88076e-56	2.31605e-54	116.968
CAD	1.41125	3.708	18.3875	3.90861e-56	2.32591e-54	116.961
TOMM34	1.77938	0.107998	18.3711	4.63128e-56	2.74007e-54	116.792
SSB	1.11565	7.34192	18.3574	5.33733e-56	3.14333e-54	116.651
LYAR	1.50282	-2.25972	18.3218	7.70526e-56	4.45603e-54	116.285
DDX56	1.06274	6.84606	18.3085	8.83312e-56	5.07966e-54	116.149
IQGAP3	2.01914	7.8554	18.2671	1.35463e-55	7.76829e-54	115.723
TMEM41A	1.06933	1.44245	18.1933	2.90051e-55	1.64043e-53	114.965
RIPK2	1.4217	-4.48643	18.1683	3.75219e-55	2.11048e-53	114.708
THUMPD2	1.04837	6.36521	18.1584	4.1542e-55	2.32386e-53	114.607
PDCD2L	1.40398	-2.58174	18.1517	4.45257e-55	2.484e-53	114.538
MTBP	1.9246	4.43024	18.1508	4.49533e-55	2.50106e-53	114.528
KIAA1257	3.17199	-1.51228	18.1438	4.82874e-55	2.66489e-53	114.457
CCND1	1.63911	10.0117	18.1067	7.08207e-55	3.86689e-53	114.075
KIF18B	1.84987	2.37076	18.1064	7.10498e-55	3.8691e-53	114.072
TROAP	1.97361	-1.31197	18.0658	1.07903e-54	5.7991e-53	113.656
PPRC1	1.13692	7.14232	18.0625	1.11677e-54	5.98625e-53	113.622
UBE2C	2.06306	2.8519	18.0249	1.64505e-54	8.74944e-53	113.236
NUF2	1.8476	6.94964	17.993	2.284e-54	1.20232e-52	112.909
DDX55	1.15593	5.09627	17.9527	3.45888e-54	1.80231e-52	112.496
TTLL4	1.1647	3.0261	17.9455	3.72529e-54	1.93621e-52	112.422
DSCC1	1.87519	0.0293061	17.9318	4.28889e-54	2.21234e-52	112.281
PUS1	1.3596	3.56083	17.9288	4.42233e-54	2.27545e-52	112.251
NOL6	1.08033	4.53121	17.9137	5.16634e-54	2.64501e-52	112.096
AMPD2	1.06154	8.23976	17.9	5.94887e-54	3.03807e-52	111.955
NAT10	1.14393	0.534755	17.8948	6.27721e-54	3.1978e-52	111.902
SOX4	1.75194	4.21673	17.8686	8.21839e-54	4.16601e-52	111.634
ANKRD13B	2.24987	-0.779124	17.8554	9.41539e-54	4.73769e-52	111.498
C9orf140	1.96764	-0.504397	17.84	1.1027e-53	5.50816e-52	111.341
SMOX	2.12372	-0.340377	17.8211	1.33922e-53	6.67333e-52	111.147
CBX4	1.51257	6.38689	17.8104	1.4948e-53	7.37697e-52	111.038
ATAD2	1.66789	1.54872	17.7561	2.61333e-53	1.26239e-51	110.481
NAA25	1.00162	5.87775	17.7496	2.79286e-53	1.34595e-51	110.415
ZSWIM4	1.56552	6.13144	17.7249	3.60139e-53	1.72346e-51	110.162
UHRF1	1.94434	-1.11881	17.717	3.90481e-53	1.86432e-51	110.081
C3orf26	1.48427	3.29893	17.7073	4.31415e-53	2.05022e-51	109.982
BRCA2	1.99126	6.53188	17.7044	4.44339e-53	2.10676e-51	109.953
C11orf82	1.94091	4.87013	17.6934	4.97676e-53	2.33805e-51	109.84
UTP14A	1.50137	-0.00123365	17.6882	5.24821e-53	2.45995e-51	109.787
XPOT	1.34406	1.18977	17.628	9.73384e-53	4.53142e-51	109.171
DIAPH3	1.8189	5.06935	17.5811	1.57657e-52	7.2735e-51	108.691
NOC3L	1.16973	-0.150781	17.547	2.23519e-52	1.02659e-50	108.343
NKD2	3.88781	2.93682	17.5318	2.61313e-52	1.19482e-50	108.188
RTKN	1.16412	8.35664	17.4953	3.79856e-52	1.72151e-50	107.815
TAF1D	1.33389	1.75761	17.4792	4.48011e-52	2.01703e-50	107.651
HSPD1	1.40077	3.09145	17.4756	4.64969e-52	2.0888e-50	107.614
CCNO	2.88415	5.00772	17.4518	5.93322e-52	2.65959e-50	107.371
FAM89A	1.70081	-0.760845	17.3937	1.07667e-51	4.78444e-50	106.778
SULT2B1	3.28703	-0.392818	17.3847	1.18028e-51	5.22221e-50	106.686
APLN	3.06962	-3.44973	17.3824	1.20787e-51	5.3328e-50	106.663
DUSP14	1.59629	0.757487	17.3414	1.83959e-51	7.96768e-50	106.244
ABCE1	1.06154	1.49552	17.3402	1.86073e-51	8.04228e-50	106.233
GRHL3	4.08905	-1.27479	17.3236	2.2057e-51	9.45367e-50	106.063
CKAP2	1.5164	8.31307	17.2849	3.27759e-51	1.3817e-49	105.669
PLEKHA9	1.41859	4.03313	17.2633	4.08953e-51	1.70646e-49	105.448
DCUN1D5	1.27352	2.06825	17.2435	5.00879e-51	2.06902e-49	105.246
SEC14L2	2.2702	-0.373792	17.243	5.03419e-51	2.07534e-49	105.241
RRP9	1.29792	2.38453	17.2349	5.46754e-51	2.24947e-49	105.159
CNN2	1.23613	6.85163	17.2021	7.64395e-51	3.10753e-49	104.825
PLXNA1	1.32002	4.79584	17.1973	8.02961e-51	3.25786e-49	104.776
SMYD5	1.06815	4.64146	17.1484	1.32437e-50	5.30007e-49	104.278
RFC3	1.75789	1.62788	17.137	1.4869e-50	5.92738e-49	104.163
CIRH1A	1.06297	8.39437	17.0839	2.559e-50	1.00452e-48	103.622
NCAPG2	1.35571	0.926011	17.0708	2.9248e-50	1.14592e-48	103.489
NOLC1	1.1814	8.92034	17.0533	3.49575e-50	1.36182e-48	103.311
C7orf40	1.68582	-0.671279	17.0282	4.51934e-50	1.7506e-48	103.056
E2F1	1.71346	0.242763	17.0086	5.51714e-50	2.12908e-48	102.857
CDK2	1.02817	6.78869	16.9872	6.86582e-50	2.63468e-48	102.639
IMPDH1	1.48583	6.0011	16.9446	1.05981e-49	4.02926e-48	102.207
C1orf170	2.69666	-4.15673	16.9437	1.07008e-49	4.06077e-48	102.197
S100A2	3.76785	1.12867	16.9363	1.15391e-49	4.36277e-48	102.122
FJX1	2.45376	-6.21443	16.9209	1.34925e-49	5.06401e-48	101.966
C11orf84	1.42402	-1.27235	16.9192	1.37392e-49	5.14718e-48	101.948
OTX1	3.86923	1.24371	16.9025	1.62812e-49	6.05531e-48	101.779
ACTR3B	1.26347	-3.23301	16.8935	1.78474e-49	6.61385e-48	101.688
KIAA0020	1.22991	2.03466	16.8844	1.95839e-49	7.2443e-48	101.595
TAF1A	1.43847	2.57583	16.8557	2.6218e-49	9.62891e-48	101.305
CEP55	1.69512	1.4733	16.8457	2.90411e-49	1.06467e-47	101.203
MRPL17	1.14161	1.83074	16.8338	3.27639e-49	1.19687e-47	101.083
TGFBI	2.88119	7.26191	16.8134	4.03448e-49	1.46081e-47	100.876
ATIC	1.03233	4.60414	16.7944	4.89668e-49	1.76366e-47	100.683
E2F7	1.94764	-2.8196	16.7738	6.03432e-49	2.15452e-47	100.475
FTSJ1	1.05464	1.26984	16.7519	7.54371e-49	2.67945e-47	100.252
TCOF1	1.3184	0.0143531	16.7391	8.59652e-49	3.04813e-47	100.122
RSL1D1	1.03126	10.056	16.7336	9.08267e-49	3.21495e-47	100.067
SNORD1C	2.12123	3.76624	16.7117	1.13583e-48	3.99977e-47	99.8448
MMP11	3.78672	3.34215	16.7034	1.23512e-48	4.32715e-47	99.7613
SLC7A11	2.52952	6.81447	16.6776	1.60567e-48	5.59666e-47	99.5001
CDK4	1.21575	4.3245	16.6741	1.66441e-48	5.78179e-47	99.4643
WDR12	1.13112	-1.88038	16.6629	1.86462e-48	6.43374e-47	99.3512
RHBDF2	1.54949	7.65985	16.6588	1.94398e-48	6.69629e-47	99.3097
TRIM29	3.95007	6.09519	16.6491	2.14588e-48	7.37938e-47	99.2113
EIF3B	1.09873	2.88027	16.6187	2.9209e-48	9.96114e-47	98.9042
WDR62	1.93307	-0.525102	16.6139	3.06719e-48	1.04427e-46	98.8555
MCM10	1.89123	3.31392	16.5896	3.92355e-48	1.33362e-46	98.6103
RCL1	1.07408	-2.25236	16.5595	5.32902e-48	1.80239e-46	98.3055
ZC3H8	1.25955	2.49591	16.5542	5.62301e-48	1.88637e-46	98.252
NFXL1	1.03447	0.0496766	16.5542	5.62328e-48	1.88637e-46	98.2519
HELLS	1.70894	-0.413125	16.5197	7.97982e-48	2.6552e-46	97.9034
KIF20A	1.68991	-1.09277	16.5159	8.29063e-48	2.75415e-46	97.8654
ARMC10	1.08254	6.39471	16.5152	8.3533e-48	2.77049e-46	97.8579
RECQL4	2.10419	-1.494	16.4939	1.03614e-47	3.42545e-46	97.6434
TTYH3	1.47762	2.97379	16.4799	1.1951e-47	3.93827e-46	97.5012
HEATR1	1.12792	3.37006	16.4692	1.33156e-47	4.37392e-46	97.3936
IARS	1.01844	3.99872	16.4591	1.47531e-47	4.83063e-46	97.2915
HAUS6	1.14379	-0.618283	16.4558	1.52475e-47	4.98456e-46	97.2587
C12orf11	1.20127	5.37954	16.4513	1.5963e-47	5.21018e-46	97.213
PAICS	1.31606	5.32763	16.4223	2.14226e-47	6.96999e-46	96.9201
ARNTL2	2.19205	4.43468	16.3921	2.90781e-47	9.35695e-46	96.6159
SCD	2.56775	8.93509	16.3764	3.4089e-47	1.0901e-45	96.4575
NEK2	1.51739	0.196663	16.3693	3.66119e-47	1.16896e-45	96.3865
TGIF2	1.86802	0.729466	16.3684	3.69571e-47	1.17815e-45	96.3771
KLK6	6.58953	1.76771	16.3593	4.05355e-47	1.28425e-45	96.2851
KLHL35	2.93681	4.3218	16.3499	4.45857e-47	1.40175e-45	96.1903
CENPF	1.6907	7.9051	16.3197	6.05059e-47	1.89116e-45	95.8862
BUB1	1.4987	0.358835	16.3197	6.05209e-47	1.89116e-45	95.886
DBF4	1.257	-0.892436	16.3168	6.2274e-47	1.94004e-45	95.8576
FAM40B	2.4991	-3.32512	16.3121	6.53586e-47	2.03305e-45	95.8094
EPHB4	1.20473	5.5339	16.3078	6.82012e-47	2.11826e-45	95.767
SLC12A8	1.25794	4.10196	16.3004	7.35699e-47	2.28156e-45	95.6916
RPGRIP1L	1.46859	5.82862	16.2712	9.87894e-47	3.04526e-45	95.3981
FANCB	1.90383	3.18388	16.251	1.21185e-46	3.71887e-45	95.1947
JPH1	1.71638	7.77339	16.2504	1.21939e-46	3.73643e-45	95.1885
GLS2	2.8646	3.39257	16.2248	1.57813e-46	4.82129e-45	94.9317
FANCI	1.39699	-0.728362	16.2171	1.70615e-46	5.20465e-45	94.854
SDCCAG3	1.03212	8.05863	16.2163	1.72053e-46	5.24073e-45	94.8457
POP1	1.46622	-0.710597	16.1824	2.42174e-46	7.31153e-45	94.5053
GALNT6	2.00809	4.9327	16.1711	2.7167e-46	8.18998e-45	94.3909
ULBP1	2.77208	-5.32119	16.1656	2.87097e-46	8.6171e-45	94.3359
PAFAH1B3	1.30614	6.00125	16.1535	3.24245e-46	9.64745e-45	94.2147
NME1	1.58857	9.15502	16.1433	3.59664e-46	1.06704e-44	94.1115
STRA6	4.83042	-1.75261	16.1424	3.62952e-46	1.07524e-44	94.1024
NCL	1.00019	10.5974	16.1404	3.70123e-46	1.0949e-44	94.083
NUDCD1	1.3669	-2.8076	16.1384	3.77573e-46	1.11373e-44	94.0631
SHCBP1	1.50549	3.9847	16.1142	4.82145e-46	1.41205e-44	93.8197
POLR1C	1.15839	3.21584	16.0732	7.28881e-46	2.11355e-44	93.4083
C19orf48	1.61907	3.70476	16.0614	8.21335e-46	2.37493e-44	93.2894
CHPF	1.53923	-1.58818	16.0562	8.65624e-46	2.49246e-44	93.2371
E2F3	1.05335	-0.155877	16.0157	1.30111e-45	3.71514e-44	92.8313
ZNF473	1.0468	0.454311	16.0153	1.30578e-45	3.72328e-44	92.8278
PHLDA1	2.45274	1.61164	16.0107	1.36806e-45	3.89546e-44	92.7814
C2CD4A	3.83216	6.70198	15.9742	1.97631e-45	5.58096e-44	92.4152
SNTB1	2.12537	0.106194	15.9732	1.99506e-45	5.62619e-44	92.4057
C2orf70	3.26989	0.0184358	15.949	2.54712e-45	7.15355e-44	92.1625
TOP1MT	1.75536	8.51071	15.9454	2.64031e-45	7.40514e-44	92.1268
EIF2S2	1.18992	2.30671	15.9408	2.76518e-45	7.74475e-44	92.0808
CELSR1	2.40528	1.65636	15.9213	3.36491e-45	9.36064e-44	91.8853
EGFL6	3.39507	-0.848954	15.9187	3.45381e-45	9.58695e-44	91.8594
KIF4A	1.5241	0.637048	15.9186	3.4556e-45	9.58695e-44	91.8589
CKAP2L	1.59039	6.58043	15.87	5.63192e-45	1.5437e-43	91.3726
C2orf15	1.35624	-2.25394	15.8571	6.41105e-45	1.74793e-43	91.2436
ZNF280C	1.42555	-1.73664	15.8551	6.54146e-45	1.78112e-43	91.2235
TRMT1	1.22351	1.60204	15.8456	7.19958e-45	1.95512e-43	91.1281
DPEP1	5.80207	6.51965	15.8339	8.09376e-45	2.18926e-43	91.0115
WDR74	1.13575	2.87365	15.8161	9.6809e-45	2.60484e-43	90.8333
WDR3	1.01291	1.83904	15.8067	1.06379e-44	2.85111e-43	90.7394
FAM72A	1.85304	-2.86589	15.7964	1.17952e-44	3.1408e-43	90.6366
PMAIP1	1.85916	-0.521085	15.7844	1.33113e-44	3.53076e-43	90.5162
KIF18A	1.49586	-0.234678	15.7803	1.3862e-44	3.6721e-43	90.4759
AP1S3	1.59318	5.38852	15.7781	1.417e-44	3.74884e-43	90.454
KIF2C	1.47573	1.73964	15.778	1.41936e-44	3.75024e-43	90.4524
KIF23	1.47819	4.30634	15.7742	1.47466e-44	3.88638e-43	90.4143
FAM176A	3.44043	-1.02952	15.7706	1.52873e-44	4.01853e-43	90.3785
TMEM161A	1.11096	4.34587	15.7648	1.61957e-44	4.24647e-43	90.321
PRDM12	1.82573	-4.24673	15.7431	2.01263e-44	5.25024e-43	90.1047
MCM3	1.08701	7.37728	15.7204	2.52713e-44	6.56735e-43	89.8781
DCAF13	1.27775	1.52981	15.7162	2.63726e-44	6.84487e-43	89.8356
RAD18	1.06763	7.12072	15.7138	2.70023e-44	6.99945e-43	89.8121
TRAP1	1.17284	5.54387	15.7045	2.96627e-44	7.66972e-43	89.7186
EEF1E1	1.15002	2.15108	15.7027	3.01927e-44	7.79693e-43	89.7009
TOP2A	1.5256	5.62824	15.7007	3.08103e-44	7.93645e-43	89.6808
CMTM8	1.19183	0.127988	15.6942	3.28827e-44	8.43852e-43	89.616
DHX34	1.24776	0.259144	15.6912	3.38831e-44	8.6844e-43	89.5861
FAM72D	1.79412	-0.418227	15.6648	4.41347e-44	1.12278e-42	89.323
GRPEL2	1.01028	1.95087	15.6503	5.10109e-44	1.2945e-42	89.1789
CNTD2	3.56131	-3.40631	15.6218	6.78574e-44	1.71144e-42	88.8948
HOMER1	2.10839	-2.44382	15.6166	7.15006e-44	1.79891e-42	88.8427
CLDN2	5.88973	8.86842	15.6019	8.27886e-44	2.07527e-42	88.6968
CCDC99	1.15753	1.87039	15.6016	8.3066e-44	2.07969e-42	88.6935
CDCA5	1.52092	0.757475	15.601	8.35884e-44	2.09022e-42	88.6872
LOC541471	1.55977	-1.41296	15.5976	8.64731e-44	2.15972e-42	88.6535
CYP27B1	1.78984	-3.68351	15.5922	9.12395e-44	2.27324e-42	88.6
GPATCH4	1.05185	2.44777	15.5821	1.00956e-43	2.51228e-42	88.4993
CCDC41	1.08474	3.65852	15.5774	1.05786e-43	2.62611e-42	88.4528
COL7A1	3.6691	4.98189	15.5714	1.12401e-43	2.78359e-42	88.3924
PNO1	1.09102	7.59603	15.5552	1.32056e-43	3.25854e-42	88.232
GRHL1	2.44047	0.317821	15.5525	1.35687e-43	3.34412e-42	88.205
PSAT1	2.54635	0.557303	15.5419	1.50907e-43	3.70146e-42	88.0992
FXYD5	1.89848	0.910046	15.5411	1.52061e-43	3.72531e-42	88.0916
EXO1	1.65354	6.2098	15.5333	1.64418e-43	4.00891e-42	88.0138
TIMP1	1.88606	2.84476	15.4979	2.34236e-43	5.6575e-42	87.6615
CDK1	1.54709	8.52975	15.4839	2.69261e-43	6.49579e-42	87.5228
AGAP3	1.03271	8.48161	15.4809	2.7738e-43	6.6838e-42	87.4932
ASPM	1.54116	0.733179	15.4737	2.98105e-43	7.16639e-42	87.4215
EZH2	1.26002	5.35955	15.4557	3.56844e-43	8.52853e-42	87.2425
GTSE1	1.46545	6.77466	15.4511	3.73483e-43	8.90547e-42	87.1971
EME1	1.68757	4.6148	15.4485	3.83317e-43	9.12935e-42	87.1712
RUNX1	1.45167	0.886933	15.4385	4.23765e-43	1.00461e-41	87.0714
C6orf167	1.22066	-2.08265	15.4254	4.82851e-43	1.14204e-41	86.9415
CELSR3	2.67674	0.655641	15.4058	5.86639e-43	1.378e-41	86.7476
C17orf53	1.4914	-2.07574	15.4013	6.13597e-43	1.43803e-41	86.7029
AURKA	1.54846	2.60807	15.3992	6.26589e-43	1.4668e-41	86.6821
HTR1D	3.93413	-0.391589	15.372	8.22005e-43	1.91335e-41	86.4119
RAE1	1.29365	8.39864	15.3683	8.52355e-43	1.98175e-41	86.3758
TCF7	1.97618	3.24219	15.3602	9.24261e-43	2.14408e-41	86.2952
RFC4	1.18448	6.81811	15.3512	1.01138e-42	2.33038e-41	86.2055
CCNF	1.39298	-0.310935	15.3335	1.20567e-42	2.75946e-41	86.0306
RRP1	1.16359	-0.0271508	15.3263	1.29522e-42	2.95126e-41	85.9593
HAUS5	1.15189	2.45996	15.3223	1.34811e-42	3.06498e-41	85.9195
GDF15	2.70006	3.28012	15.3168	1.42407e-42	3.22695e-41	85.8649
COL10A1	6.22398	-2.97575	15.2981	1.71478e-42	3.85169e-41	85.68
MTHFD2	1.41656	5.85502	15.2842	1.96988e-42	4.41022e-41	85.542
FOSL1	3.33465	0.514443	15.2816	2.02182e-42	4.52157e-41	85.516
PHF16	1.39278	-1.29107	15.2667	2.34488e-42	5.23266e-41	85.3685
MCM7	1.15886	4.76156	15.2522	2.70794e-42	6.02318e-41	85.2252
B3GNTL1	1.49133	3.11823	15.2479	2.82607e-42	6.27234e-41	85.1827
POLD2	1.16035	8.44452	15.2451	2.90644e-42	6.4368e-41	85.1548
ATG9B	3.23085	4.66307	15.2303	3.36679e-42	7.41632e-41	85.0085
LMTK3	2.49214	4.59744	15.2299	3.37924e-42	7.43579e-41	85.0048
TESC	3.80885	-0.587066	15.1919	4.92827e-42	1.0775e-40	84.6292
C13orf37	1.38577	0.686305	15.1874	5.15438e-42	1.12454e-40	84.5846
ANKZF1	1.00875	0.371182	15.1867	5.18767e-42	1.1306e-40	84.5782
VEGFA	1.52828	2.70959	15.1653	6.41851e-42	1.39147e-40	84.3663
RRS1	1.36581	5.24111	15.1505	7.43467e-42	1.60667e-40	84.22
KIAA1524	1.46076	-1.69694	15.136	8.58262e-42	1.84891e-40	84.0771
CENPN	1.23512	2.32847	15.1274	9.34591e-42	2.00913e-40	83.9923
WDR4	1.3917	2.3086	15.096	1.27586e-41	2.72847e-40	83.6825
CENPE	1.59706	3.73631	15.0829	1.45221e-41	3.10238e-40	83.5537
CENPA	1.49999	6.29852	15.08	1.49551e-41	3.18494e-40	83.5244
DSN1	1.22192	0.673794	15.0797	1.49963e-41	3.19041e-40	83.5217
WDR77	1.28466	0.630245	15.0759	1.55651e-41	3.30458e-40	83.4846
LOC388796	1.92307	-0.171935	15.0713	1.62912e-41	3.44803e-40	83.4393
SH3TC2	3.0103	-1.87765	15.066	1.71716e-41	3.62689e-40	83.3869
KPNA2	1.27911	4.87081	15.0557	1.90264e-41	4.01451e-40	83.2848
RPF2	1.12212	0.5645	15.0457	2.09965e-41	4.42565e-40	83.1867
PKMYT1	1.66096	1.0979	15.0245	2.59032e-41	5.43755e-40	82.9777
GRAMD1A	1.44629	0.640333	15.0239	2.60439e-41	5.4615e-40	82.9723
GTPBP3	1.00478	4.08573	15.0211	2.67962e-41	5.61352e-40	82.944
MEX3A	2.73965	6.36537	15.015	2.84495e-41	5.94775e-40	82.8844
OXTR	2.42358	3.0153	14.9855	3.80855e-41	7.93803e-40	82.5941
SHMT2	1.29574	3.24377	14.968	4.53115e-41	9.41544e-40	82.4212
UBE2S	1.61283	6.12031	14.962	4.80558e-41	9.9655e-40	82.3627
RCN1	1.33275	2.39991	14.9543	5.18377e-41	1.07281e-39	82.2873
CHTF18	1.59779	-0.380517	14.9522	5.29291e-41	1.09429e-39	82.2666
HM13	1.11185	1.30056	14.9379	6.09728e-41	1.25122e-39	82.1258
C16orf59	1.65705	5.90109	14.9287	6.67759e-41	1.36817e-39	82.0353
MYBL2	1.92956	1.95042	14.9223	7.11649e-41	1.45086e-39	81.9719
LOC646851	2.08691	-2.98101	14.9089	8.12289e-41	1.65112e-39	81.8403
VARS	1.01549	7.7255	14.9081	8.18737e-41	1.66258e-39	81.8324
DBNDD1	2.28739	1.35459	14.8985	8.99682e-41	1.82334e-39	81.7386
PPAN	1.09222	0.957194	14.8955	9.26912e-41	1.87114e-39	81.709
SNHG1	1.62252	1.22766	14.891	9.69017e-41	1.9523e-39	81.6647
ZBTB12	1.45082	2.16464	14.8874	1.00434e-40	2.02147e-39	81.6291
MSI2	1.16698	4.45321	14.858	1.34182e-40	2.67713e-39	81.3408
MTERFD1	1.16881	-1.01986	14.8544	1.38957e-40	2.7697e-39	81.306
MELK	1.45911	7.45236	14.8523	1.41894e-40	2.8255e-39	81.2852
RNASEH2A	1.21465	3.16957	14.8371	1.64921e-40	3.26188e-39	81.1356
PNPT1	1.06426	2.17334	14.7976	2.43315e-40	4.78473e-39	80.7486
EIF5A2	1.3283	-0.968092	14.7946	2.50545e-40	4.91749e-39	80.7194
TRIM59	1.17125	5.11715	14.7436	4.1402e-40	8.04147e-39	80.2196
GPR56	1.35436	7.74739	14.7422	4.19742e-40	8.14489e-39	80.2059
CENPI	1.7464	-2.06691	14.7217	5.13516e-40	9.91767e-39	80.0053
LRP11	1.1992	8.65697	14.7209	5.17386e-40	9.98302e-39	79.9978
SPC25	1.32125	1.45134	14.7189	5.281e-40	1.01802e-38	79.9774
NPM1	1.15613	3.6957	14.7165	5.40333e-40	1.04062e-38	79.9546
KNTC1	1.20867	-0.27034	14.7098	5.7722e-40	1.10751e-38	79.8889
GPR3	2.19535	-4.54116	14.7072	5.92332e-40	1.13544e-38	79.8632
PBX4	1.91376	-2.65088	14.7028	6.18552e-40	1.18349e-38	79.8201
FANCA	1.46958	1.1155	14.6971	6.53881e-40	1.24992e-38	79.7648
FABP6	4.93969	-2.65084	14.6812	7.64985e-40	1.45418e-38	79.6087
MSX1	2.67958	-1.50762	14.667	8.7929e-40	1.6653e-38	79.4701
CTPS	1.20796	1.57532	14.6598	9.43435e-40	1.78185e-38	79.4001
ZNF692	1.55392	6.97705	14.6558	9.81419e-40	1.85019e-38	79.3608
SQLE	1.76858	5.76765	14.6372	1.17803e-39	2.20867e-38	79.1791
DGAT2	1.91763	6.19698	14.607	1.58368e-39	2.95571e-38	78.8846
ADAT2	1.48343	-0.963587	14.6056	1.60559e-39	2.9939e-38	78.871
SLC5A6	1.66145	6.2369	14.583	2.00453e-39	3.72088e-38	78.6502
SORD	1.46605	-0.0821629	14.5811	2.04284e-39	3.78857e-38	78.6313
PPA1	1.1195	8.39647	14.5699	2.27991e-39	4.22061e-38	78.5221
AEN	1.22099	1.62744	14.565	2.39106e-39	4.42239e-38	78.4747
CCDC150	2.26905	-6.98098	14.5565	2.5998e-39	4.79981e-38	78.3914
TNS4	3.27591	2.57058	14.5498	2.77431e-39	5.10821e-38	78.3268
PFDN2	1.01921	1.61284	14.5466	2.86217e-39	5.26527e-38	78.2958
NR2C2AP	1.09414	1.92595	14.5398	3.05951e-39	5.6082e-38	78.2294
RAD54L	1.60144	2.76625	14.5331	3.26763e-39	5.96837e-38	78.1639
POLQ	1.60634	-1.68584	14.5294	3.38776e-39	6.17131e-38	78.128
NOTUM	6.43462	-3.04225	14.5236	3.58703e-39	6.52274e-38	78.0712
GPT2	1.59521	-0.510892	14.5235	3.59074e-39	6.5237e-38	78.0701
EXOSC5	1.22201	2.02034	14.507	4.2203e-39	7.627e-38	77.9094
ERCC6L	1.74057	-0.446177	14.4927	4.85261e-39	8.7313e-38	77.7705
TARBP1	1.22773	4.8522	14.4884	5.05968e-39	9.0959e-38	77.7289
PRR19	1.28827	-3.43888	14.4755	5.74381e-39	1.02808e-37	77.6027
GGCT	1.22046	3.99271	14.4721	5.9369e-39	1.05987e-37	77.5698
SLC3A2	1.0554	8.07833	14.471	5.998e-39	1.06984e-37	77.5596
CCDC19	1.97955	-3.73538	14.4709	6.00345e-39	1.06989e-37	77.5587
FAM54A	1.46265	5.94288	14.4689	6.12625e-39	1.09082e-37	77.5386
LOC100190940	6.13979	-4.16802	14.4418	7.98049e-39	1.41241e-37	77.2755
CDC6	1.66409	2.19678	14.4268	9.24061e-39	1.63261e-37	77.1296
ITGA2	1.4715	-0.393107	14.4187	9.99898e-39	1.76357e-37	77.0512
TH1L	1.3323	2.64093	14.4162	1.02523e-38	1.80514e-37	77.0263
SUV39H2	1.05742	0.226719	14.3944	1.26778e-38	2.21888e-37	76.815
SLC25A32	1.03171	7.67014	14.3875	1.35613e-38	2.37149e-37	76.748
SGOL1	1.42213	5.70142	14.3688	1.62866e-38	2.82881e-37	76.5658
NCAPH	1.30753	2.2748	14.3562	1.84153e-38	3.19312e-37	76.4436
TXNRD3IT1	1.20337	-0.150064	14.3541	1.87881e-38	3.24953e-37	76.4236
ZDHHC9	1.26351	2.40125	14.3536	1.88792e-38	3.26254e-37	76.4188
NMB	1.51047	-5.10759	14.351	1.9365e-38	3.33807e-37	76.3936
SLMO1	1.77422	1.10025	14.3499	1.95822e-38	3.36984e-37	76.3825
MYC	1.76627	3.07486	14.3459	2.03432e-38	3.48911e-37	76.3445
TKT	1.00784	5.77514	14.3404	2.1482e-38	3.67216e-37	76.2903
GPR180	1.05051	5.59831	14.332	2.33105e-38	3.97809e-37	76.2091
FAM60A	1.16464	3.5317	14.3269	2.44989e-38	4.1705e-37	76.1596
ZNF74	1.07106	1.89725	14.3257	2.4786e-38	4.21588e-37	76.148
PDCD11	1.06037	4.41603	14.3234	2.53356e-38	4.30223e-37	76.1262
TMEM97	1.45575	6.93088	14.3129	2.80679e-38	4.74267e-37	76.0243
DTL	1.36163	3.58726	14.3094	2.90488e-38	4.90437e-37	75.9901
FGFRL1	1.68118	1.47573	14.2852	3.67698e-38	6.19265e-37	75.7556
NAT9	1.04898	0.867184	14.2805	3.84715e-38	6.46864e-37	75.7106
RHEBL1	1.8064	-3.65897	14.2399	5.71489e-38	9.53875e-37	75.3169
NOP56	1.3648	-1.93276	14.2326	6.13344e-38	1.01959e-36	75.2466
PABPC1L	2.94106	-0.0628303	14.2325	6.13933e-38	1.01974e-36	75.2457
MLXIPL	3.03429	3.77032	14.2301	6.2822e-38	1.04263e-36	75.2228
KRT17	4.72092	-1.77486	14.2181	7.06341e-38	1.17134e-36	75.1062
FIGNL1	1.17497	-1.12547	14.1927	9.03911e-38	1.49294e-36	74.8608
ZNF485	1.18453	3.45027	14.1882	9.44093e-38	1.55556e-36	74.8175
DBF4B	1.22794	-3.33065	14.187	9.54818e-38	1.57197e-36	74.8063
WDR66	2.48189	1.31928	14.1714	1.11132e-37	1.82232e-36	74.6553
WNT3	2.14501	-4.52146	14.1568	1.28014e-37	2.09079e-36	74.5146
C1orf112	1.20352	-0.299337	14.156	1.29005e-37	2.1053e-36	74.507
UBE2CBP	1.15635	-1.36806	14.1466	1.41381e-37	2.29996e-36	74.4158
ULBP2	3.21344	-4.98956	14.1291	1.67533e-37	2.71465e-36	74.247
DDX21	1.21627	3.96616	14.0681	3.0255e-37	4.84127e-36	73.659
TTK	1.36599	2.84436	14.0537	3.47946e-37	5.55469e-36	73.52
PRMT3	1.18449	6.87649	14.0439	3.82516e-37	6.08764e-36	73.4257
C16orf46	1.09022	-4.24061	14.0424	3.8793e-37	6.16424e-36	73.4118
CENPP	1.29865	-3.17708	14.0359	4.13237e-37	6.55623e-36	73.3489
RPP40	1.28274	6.00346	14.0066	5.48295e-37	8.61907e-36	73.0676
C16orf55	1.16539	6.06931	14	5.84381e-37	9.16528e-36	73.0042
CHAF1B	1.28786	-1.32044	13.9925	6.2831e-37	9.81675e-36	72.9321
PLK1	1.31884	1.13653	13.9796	7.11707e-37	1.1086e-35	72.8081
NUFIP1	1.36845	-0.265677	13.978	7.23435e-37	1.12601e-35	72.7919
RNF183	2.79601	1.52279	13.9537	9.14295e-37	1.41557e-35	72.559
SLC7A6	1.08017	2.67546	13.9471	9.74257e-37	1.505e-35	72.4958
HAGHL	2.87259	0.948293	13.9466	9.79698e-37	1.51227e-35	72.4903
CARD14	2.34062	-3.07529	13.9414	1.02923e-36	1.58634e-35	72.4412
TGS1	1.01123	-0.0813069	13.9083	1.4164e-36	2.1733e-35	72.1236
UGGT2	1.21121	3.16641	13.907	1.43465e-36	2.19965e-35	72.1109
NAP1L1	1.0687	10.2755	13.895	1.61098e-36	2.45898e-35	71.9956
NOP16	1.14285	-0.390531	13.8843	1.78505e-36	2.71661e-35	71.8935
ULBP3	1.85368	0.0200537	13.8786	1.88657e-36	2.86576e-35	71.8385
CTU2	1.00949	-0.169156	13.866	2.12938e-36	3.21679e-35	71.7181
STC2	3.5115	0.083175	13.8445	2.62075e-36	3.94746e-35	71.5116
RGS16	2.16034	1.65976	13.844	2.63311e-36	3.96318e-35	71.5069
CTHRC1	3.28811	-0.798089	13.8191	3.34595e-36	5.00308e-35	71.2686
MSX2	3.92743	-3.77553	13.8184	3.36801e-36	5.0324e-35	71.2621
NLE1	1.168	-1.33142	13.8123	3.57022e-36	5.32679e-35	71.2041
SLC4A11	3.62189	1.51639	13.81	3.65041e-36	5.44248e-35	71.182
AHCY	1.33888	3.10379	13.8082	3.71629e-36	5.53266e-35	71.1642
NCAPG	1.28996	5.20674	13.7899	4.42999e-36	6.57612e-35	70.9895
PLOD3	1.09517	9.82456	13.7818	4.788e-36	7.10244e-35	70.9122
BUB1B	1.36599	-1.32989	13.7725	5.23315e-36	7.74596e-35	70.8238
BRCA1	1.28857	-0.960856	13.772	5.26022e-36	7.78042e-35	70.8186
ZNF695	2.01941	3.51118	13.7461	6.74779e-36	9.9164e-35	70.571
MRPS17	1.05532	3.90042	13.7414	7.06077e-36	1.03615e-34	70.5259
MND1	1.52397	0.933109	13.7405	7.11563e-36	1.04346e-34	70.5182
KCNJ14	1.6461	-0.0909373	13.7327	7.67162e-36	1.12098e-34	70.4433
SRM	1.08688	8.52994	13.7157	9.02756e-36	1.31351e-34	70.2815
VSNL1	2.66293	4.29959	13.707	9.81591e-36	1.42116e-34	70.1982
C20orf199	1.65764	7.0512	13.6888	1.16838e-35	1.68093e-34	70.025
MCM2	1.12357	4.25067	13.686	1.20097e-35	1.72539e-34	69.9976
KIAA0406	1.1339	4.83569	13.6824	1.24313e-35	1.78471e-34	69.9633
GRINA	1.17764	1.53306	13.6823	1.24446e-35	1.78538e-34	69.9622
MGC14436	2.75723	1.65205	13.679	1.28407e-35	1.83835e-34	69.9311
C15orf42	1.62975	1.07995	13.6676	1.43149e-35	2.04513e-34	69.823
UTP20	1.07365	-0.0814477	13.659	1.55469e-35	2.21805e-34	69.7409
CDCA3	1.41219	-0.342114	13.6566	1.59078e-35	2.26796e-34	69.7181
SNORA8	1.28697	-1.09126	13.6339	1.97801e-35	2.81223e-34	69.5014
POU5F1B	3.33095	-1.95407	13.6214	2.22869e-35	3.1577e-34	69.3827
CD44	1.19767	3.93199	13.6135	2.40318e-35	3.39321e-34	69.3078
CENPH	1.29134	-1.64339	13.6095	2.49641e-35	3.52e-34	69.2699
STX1A	1.66713	-2.75707	13.6064	2.57332e-35	3.62596e-34	69.2398
SFTA2	4.08176	-3.27084	13.6008	2.71484e-35	3.81752e-34	69.1865
RP9P	1.06786	-0.624511	13.5958	2.84712e-35	3.99532e-34	69.1392
CHEK1	1.12082	-3.82187	13.5581	4.08158e-35	5.68486e-34	68.781
ALKBH2	1.09314	4.64722	13.556	4.1644e-35	5.79628e-34	68.7611
UBE2T	1.38121	-1.81101	13.5496	4.42515e-35	6.14671e-34	68.7007
DONSON	1.00012	1.31268	13.5449	4.63069e-35	6.41917e-34	68.6555
BOP1	1.73732	-1.9613	13.5413	4.78929e-35	6.63456e-34	68.622
TIMELESS	1.08229	0.23486	13.5399	4.85761e-35	6.72467e-34	68.6079
CDCA7	1.61046	3.43575	13.5106	6.42083e-35	8.84102e-34	68.3305
C8orf30A	1.22175	4.09466	13.4799	8.60235e-35	1.17973e-33	68.0397
PSPH	1.35905	1.31326	13.4768	8.86612e-35	1.2151e-33	68.0096
MIR17HG	2.31054	-1.50831	13.4764	8.89525e-35	1.21828e-33	68.0064
ABCC1	1.09764	2.70923	13.4736	9.13678e-35	1.24969e-33	67.9797
RACGAP1	1.0362	1.26892	13.4658	9.83715e-35	1.3428e-33	67.9063
URB1	1.05676	8.1606	13.4652	9.89476e-35	1.34887e-33	67.9005
TGDS	1.14763	6.60938	13.4539	1.1024e-34	1.49784e-33	67.793
C9orf117	1.4997	-0.283405	13.4527	1.11474e-34	1.5136e-33	67.782
MAD2L1	1.38557	8.07396	13.4523	1.1188e-34	1.51811e-33	67.7783
DUS4L	1.07288	-2.07926	13.442	1.23385e-34	1.66542e-33	67.681
DNA2	1.42905	-1.46499	13.4024	1.79966e-34	2.40697e-33	67.3057
LMNB2	1.08637	8.63114	13.3951	1.92826e-34	2.57394e-33	67.2371
KIFC1	1.21398	3.09967	13.3809	2.20616e-34	2.93725e-33	67.1032
C14orf79	1.20169	-2.57107	13.3806	2.21218e-34	2.94336e-33	67.1005
CCDC78	3.05821	-4.46529	13.3697	2.45344e-34	3.25803e-33	66.9976
ATAD5	1.35023	-4.87507	13.3346	3.42451e-34	4.51833e-33	66.666
CDCA4	1.18321	-0.559346	13.3211	3.89412e-34	5.11165e-33	66.5382
CA9	5.08285	4.17104	13.3041	4.57408e-34	5.99272e-33	66.3782
CHD7	1.19676	-0.720709	13.2995	4.77487e-34	6.25179e-33	66.3355
IPO4	1.13361	1.70843	13.2792	5.79085e-34	7.56274e-33	66.1437
SGOL2	1.10168	0.942222	13.2767	5.92882e-34	7.73799e-33	66.1203
GDPD5	2.39012	-0.39683	13.2759	5.97329e-34	7.79108e-33	66.1129
HMGA1	1.30126	2.12735	13.2757	5.9823e-34	7.79789e-33	66.1114
CDC45	1.56491	4.80717	13.2582	7.06182e-34	9.1701e-33	65.9464
RRM2	1.41908	1.15317	13.2507	7.58014e-34	9.81832e-33	65.876
LAS1L	1.05021	4.17533	13.2373	8.61049e-34	1.11318e-32	65.7493
DVWA	1.5788	-0.509821	13.1802	1.47647e-33	1.89094e-32	65.2132
CKS2	1.42944	3.16091	13.1764	1.53087e-33	1.95574e-32	65.1772
HSPH1	1.65776	8.91822	13.1698	1.62809e-33	2.07865e-32	65.116
PPIL1	1.00776	2.67075	13.1419	2.11997e-33	2.68495e-32	64.8536
FAP	3.57086	0.332013	13.1245	2.49659e-33	3.1464e-32	64.691
TGIF1	1.04633	0.600766	13.1149	2.7342e-33	3.43322e-32	64.6006
PRC1	1.21665	5.85341	13.1123	2.80039e-33	3.51418e-32	64.5768
KRT23	5.86293	-1.82503	13.0853	3.61252e-33	4.50304e-32	64.3237
FANCD2	1.15342	-1.79323	13.0658	4.34076e-33	5.3814e-32	64.1411
UCN2	2.53994	2.30329	13.0242	6.41304e-33	7.88381e-32	63.7532
NCAPD3	1.03246	-1.02215	13.0051	7.67657e-33	9.41458e-32	63.5744
TLX1	3.27304	4.20762	12.9995	8.09002e-33	9.90979e-32	63.5223
FOXM1	1.38415	6.82702	12.9879	9.02273e-33	1.10194e-31	63.4138
TG	4.00127	-2.37297	12.9837	9.37989e-33	1.14488e-31	63.3752
SNAI1	1.71468	5.20117	12.9812	9.60842e-33	1.17208e-31	63.3513
ADAM12	3.57424	2.15055	12.9748	1.02016e-32	1.24149e-31	63.2917
RNF43	2.12052	1.57161	12.9694	1.07331e-32	1.30077e-31	63.2413
LEMD1	3.97642	2.82522	12.9666	1.10199e-32	1.33395e-31	63.2151
PCSK9	2.88394	3.12181	12.9539	1.24053e-32	1.49812e-31	63.0973
BTBD16	2.48499	2.44004	12.9462	1.33336e-32	1.60928e-31	63.0256
GTF3A	1.57225	4.21135	12.9394	1.42202e-32	1.71191e-31	62.9616
IL23A	2.5879	0.451919	12.9388	1.42995e-32	1.71979e-31	62.9561
SPRY4	1.10341	0.626145	12.9179	1.73826e-32	2.07964e-31	62.762
TRAF5	1.44364	2.6238	12.9171	1.75186e-32	2.09346e-31	62.7543
ZNF643	1.36097	-1.5367	12.9002	2.05162e-32	2.44456e-31	62.5973
ECE2	1.11314	0.101817	12.886	2.34363e-32	2.7812e-31	62.465
ACCN2	1.92071	-1.98192	12.8853	2.35824e-32	2.79599e-31	62.4588
OTUD6B	1.14305	-1.47572	12.8772	2.5442e-32	3.01051e-31	62.3834
GINS1	1.50739	7.21068	12.866	2.82439e-32	3.32481e-31	62.2796
SHB	1.00944	0.181014	12.8651	2.84851e-32	3.35129e-31	62.2711
KIF24	1.11858	4.94998	12.8649	2.85434e-32	3.35622e-31	62.2691
PSMC3IP	1.44904	-1.8418	12.8617	2.93983e-32	3.45082e-31	62.2397
ZNF697	1.31174	-2.04608	12.8519	3.22257e-32	3.76547e-31	62.1485
PTRH1	1.2055	6.30216	12.8383	3.6604e-32	4.26977e-31	62.0219
TFR2	2.6476	-6.02886	12.8334	3.83004e-32	4.45752e-31	61.9768
SAMD10	1.33001	-0.793305	12.8333	3.83406e-32	4.45968e-31	61.9758
WDR67	1.04489	3.15099	12.8104	4.74549e-32	5.50113e-31	61.7638
TMEM63A	1.16381	2.64995	12.8012	5.17384e-32	5.98753e-31	61.6779
SLC29A1	1.17477	0.419687	12.7944	5.50857e-32	6.35699e-31	61.6156
GNB1L	1.21022	-1.90285	12.7897	5.75822e-32	6.64136e-31	61.5716
CEBPB	1.12853	0.107688	12.785	6.01541e-32	6.92244e-31	61.5282
RPS6KL1	1.40273	3.04034	12.7349	9.58961e-32	1.09436e-30	61.0647
PDCD5	1.00429	7.67452	12.7319	9.85959e-32	1.12329e-30	61.0371
POLR1A	1.01549	5.97102	12.7302	1.00177e-31	1.14004e-30	61.0213
SPERT	3.16222	1.69767	12.7237	1.06471e-31	1.20899e-30	60.9607
UPF3B	1.02797	-0.203462	12.7169	1.13369e-31	1.28519e-30	60.8983
PSRC1	1.24351	-3.22466	12.7142	1.16246e-31	1.31489e-30	60.8734
RPL36A	2.04897	-0.489378	12.7071	1.24165e-31	1.40061e-30	60.8079
PASK	1.10177	0.35044	12.7039	1.27963e-31	1.44266e-30	60.778
LOC389791	2.24272	-0.0703255	12.6648	1.84054e-31	2.06482e-30	60.4168
?|10357	1.0793	3.28429	12.663	1.87058e-31	2.09624e-30	60.4007
C12orf48	1.2938	4.30485	12.6395	2.32652e-31	2.59584e-30	60.1839
PLEKHG4	1.81644	5.80091	12.6241	2.68325e-31	2.98576e-30	60.0422
RCC1	1.11238	4.53567	12.6099	3.0612e-31	3.39343e-30	59.9112
CHI3L1	3.47803	3.96409	12.605	3.20278e-31	3.54655e-30	59.8663
TIGD1	1.37796	-2.39882	12.5945	3.53097e-31	3.90155e-30	59.7693
PCNXL2	1.37686	-1.91223	12.592	3.61392e-31	3.98788e-30	59.7463
STIL	1.16951	-0.676559	12.5919	3.61493e-31	3.98788e-30	59.746
MSH5	1.55787	-1.65622	12.5898	3.68598e-31	4.06408e-30	59.7266
BIRC5	1.43313	-0.93118	12.5812	3.99315e-31	4.3886e-30	59.6471
PYCRL	1.3663	5.60335	12.5803	4.02482e-31	4.41869e-30	59.6393
TRAIP	1.09896	6.07569	12.5369	6.01245e-31	6.54484e-30	59.2405
STK31	3.18772	-3.01821	12.5367	6.02575e-31	6.55584e-30	59.2383
NANP	1.17758	6.47539	12.5317	6.31058e-31	6.86209e-30	59.1924
DDX11	1.24764	0.204974	12.5204	7.00365e-31	7.59963e-30	59.0888
PDRG1	1.17637	6.97439	12.5174	7.19746e-31	7.80168e-30	59.0617
FAM188B	1.20428	1.29246	12.5099	7.71868e-31	8.35783e-30	58.9922
NCRNA00152	1.48627	5.66564	12.4916	9.1355e-31	9.85559e-30	58.8248
CST4	3.33985	2.38881	12.4846	9.74796e-31	1.04888e-29	58.7603
BFSP1	1.84503	0.1004	12.4778	1.03791e-30	1.1162e-29	58.698
CCNB1	1.34174	1.07987	12.4727	1.08736e-30	1.16755e-29	58.6517
NFKBIL2	1.30559	7.7194	12.4722	1.09291e-30	1.1729e-29	58.6467
NKD1	3.96084	5.97298	12.4719	1.09518e-30	1.17472e-29	58.6446
GJB4	3.28678	-1.93552	12.4641	1.17677e-30	1.26091e-29	58.5732
BLM	1.25557	5.60435	12.4512	1.32556e-30	1.41591e-29	58.4549
ARFGAP1	1.03813	3.39198	12.4509	1.32965e-30	1.41953e-29	58.4519
ATXN7L2	1.00559	-0.425898	12.445	1.40308e-30	1.49638e-29	58.3984
UNC5CL	2.18309	3.72484	12.4416	1.44828e-30	1.54218e-29	58.3669
ARHGEF38	1.2483	-3.4746	12.4283	1.63684e-30	1.73756e-29	58.2453
GAD1	3.76562	-3.96679	12.4228	1.72209e-30	1.82522e-29	58.1949
PTTG1	1.30397	0.271065	12.4213	1.74601e-30	1.84961e-29	58.1812
STC1	2.22472	-2.40259	12.3988	2.14758e-30	2.26218e-29	57.9755
C22orf29	1.02274	0.740343	12.39	2.32704e-30	2.44744e-29	57.8958
KIF20B	1.11327	0.901965	12.3624	3.00057e-30	3.14134e-29	57.6432
WDR90	1.30799	-0.831402	12.355	3.20929e-30	3.35131e-29	57.5764
MFSD2B	1.39696	4.31338	12.3509	3.33232e-30	3.47448e-29	57.5391
NAA16	1.0193	-0.780303	12.3428	3.5903e-30	3.72643e-29	57.465
C4orf21	1.23655	2.34413	12.3305	4.01981e-30	4.15333e-29	57.3527
FASN	1.34129	6.38983	12.3021	5.21526e-30	5.35079e-29	57.0941
ZNF239	1.64089	-1.14264	12.3008	5.27456e-30	5.40893e-29	57.0828
TCFL5	1.28112	6.80273	12.2681	7.11681e-30	7.25823e-29	56.7852
CDC25C	1.18901	-0.0966223	12.2674	7.16075e-30	7.29942e-29	56.7791
SLC7A1	1.15982	9.51646	12.2504	8.36772e-30	8.48342e-29	56.6244
ANXA3	1.4331	4.23485	12.2494	8.44308e-30	8.55138e-29	56.6155
CCNE1	1.3929	1.8642	12.2493	8.44868e-30	8.55283e-29	56.6148
FBXO41	1.83656	6.80846	12.2439	8.87574e-30	8.98073e-29	56.5658
PRDX4	1.06331	9.22606	12.2412	9.10422e-30	9.1983e-29	56.5406
NUSAP1	1.18241	2.71442	12.2352	9.61707e-30	9.69737e-29	56.4862
DLGAP5	1.2224	4.66752	12.1887	1.46997e-29	1.46355e-28	56.0647
DHCR7	1.22835	-0.059657	12.1695	1.75045e-29	1.72856e-28	55.8912
LIF	1.64151	-0.2558	12.1672	1.78782e-29	1.76207e-28	55.8702
LOC100272146	1.06114	0.714379	12.165	1.82412e-29	1.79699e-28	55.8503
GTF2F2	1.11608	7.37316	12.1642	1.83733e-29	1.80913e-28	55.8431
MMP3	4.58346	-0.826537	12.1557	1.98531e-29	1.9511e-28	55.7662
MORC4	1.26934	0.820943	12.151	2.07299e-29	2.03532e-28	55.7232
ZNRF3	1.47471	8.0855	12.1376	2.34092e-29	2.29071e-28	55.6025
HMMR	1.36907	-0.612094	12.1158	2.85353e-29	2.77644e-28	55.4058
DDX12	1.49537	-2.68541	12.1157	2.85642e-29	2.77794e-28	55.4048
DNMT3B	1.69633	4.70339	12.1145	2.88794e-29	2.8061e-28	55.3939
S100P	2.41415	7.11996	12.1142	2.89656e-29	2.81298e-28	55.391
EVPL	1.64776	1.31025	12.1012	3.2589e-29	3.14996e-28	55.2739
FAM72B	1.46114	-2.1918	12.0955	3.43436e-29	3.31488e-28	55.2218
NEIL3	1.39599	-2.74592	12.0943	3.47176e-29	3.3494e-28	55.211
NT5DC2	1.27137	6.2643	12.0907	3.58734e-29	3.45928e-28	55.1785
EXOSC8	1.06913	0.149765	12.0862	3.73696e-29	3.59849e-28	55.1379
SLC1A5	1.02211	2.10079	12.0705	4.30752e-29	4.13433e-28	54.9968
PERP	1.18044	6.89121	12.0289	6.28469e-29	5.97336e-28	54.6216
ESPL1	1.24042	-1.14432	12.0264	6.42672e-29	6.10554e-28	54.5994
MPP6	1.98428	-3.78368	12.0147	7.14722e-29	6.7681e-28	54.4939
PRKDC	1.21239	10.1637	12.0042	7.85528e-29	7.43175e-28	54.4001
CXCL3	2.64982	1.69893	12.0006	8.11464e-29	7.67006e-28	54.3678
LOC146880	1.21589	2.63109	11.9993	8.21374e-29	7.76015e-28	54.3558
AZGP1	2.72845	2.09469	11.9875	9.13754e-29	8.60916e-28	54.2499
ProSAPiP1	1.84225	7.39861	11.9864	9.22768e-29	8.6901e-28	54.2402
ASPHD1	2.06172	-2.76289	11.9762	1.01215e-28	9.52311e-28	54.1484
XPO4	1.0099	-0.909603	11.9697	1.07324e-28	1.00656e-27	54.0901
JAG2	1.70166	-1.65996	11.9689	1.08129e-28	1.01336e-27	54.0827
ATP6V1C2	1.85878	-4.21869	11.9475	1.3122e-28	1.22452e-27	53.8905
HSPE1	1.05535	3.0547	11.9345	1.4747e-28	1.37304e-27	53.7746
LEF1	2.09182	2.67179	11.915	1.75917e-28	1.63124e-27	53.5994
NKPD1	2.10494	-2.30904	11.9065	1.89879e-28	1.75358e-27	53.5236
E2F5	1.41084	-1.36123	11.9063	1.90256e-28	1.75627e-27	53.5216
YDJC	1.02998	-0.913277	11.8883	2.23775e-28	2.05645e-27	53.3605
IL11	3.39915	-2.07744	11.8867	2.26974e-28	2.08491e-27	53.3464
SPTBN5	2.83764	2.78481	11.8785	2.44468e-28	2.24159e-27	53.2726
C19orf45	2.1844	4.09306	11.8771	2.47463e-28	2.26805e-27	53.2605
MAPK15	3.13466	-2.28811	11.877	2.47776e-28	2.2699e-27	53.2593
NBEAL2	1.13645	2.58184	11.8703	2.63087e-28	2.40372e-27	53.1997
RAD51AP1	1.28235	-2.47142	11.8692	2.65722e-28	2.42673e-27	53.1898
IER5L	1.50514	6.52112	11.8676	2.69766e-28	2.46146e-27	53.1748
NUP62CL	1.51848	-2.03654	11.8624	2.82467e-28	2.57507e-27	53.1292
MKI67	1.3135	6.47357	11.851	3.13155e-28	2.84977e-27	53.0267
SFXN3	1.05454	2.3736	11.8355	3.59905e-28	3.26651e-27	52.8886
ASCL2	3.02949	0.327242	11.8287	3.82723e-28	3.46726e-27	52.8275
CCNB1IP1	1.06251	2.43058	11.8286	3.82868e-28	3.46726e-27	52.8272
POLR1D	1.05023	9.26404	11.8128	4.41392e-28	3.9797e-27	52.6859
IL8	3.35936	-0.443928	11.8042	4.76652e-28	4.2882e-27	52.6096
CXCL1	2.66318	1.30206	11.8026	4.83553e-28	4.34837e-27	52.5953
ZC3HAV1L	1.44028	-1.03448	11.7995	4.97566e-28	4.46851e-27	52.567
EIF2C2	1.0457	3.882	11.7845	5.69184e-28	5.09165e-27	52.4335
OTUB2	1.66062	1.34684	11.7835	5.74198e-28	5.13204e-27	52.4247
SNHG4	1.68005	0.624499	11.7663	6.69662e-28	5.95932e-27	52.272
TNFRSF10B	1.17405	5.4921	11.7493	7.80299e-28	6.91989e-27	52.1202
RAB36	1.72229	4.516	11.7447	8.12621e-28	7.2003e-27	52.0799
ATHL1	2.37684	2.00367	11.7308	9.20261e-28	8.11902e-27	51.9564
GRIN2B	2.33092	-0.942999	11.7306	9.22084e-28	8.1316e-27	51.9545
ADAMTS6	1.99051	-2.87892	11.7234	9.83409e-28	8.64272e-27	51.8905
DEPDC1B	1.15275	3.26656	11.7141	1.06934e-27	9.38186e-27	51.8074
SPAG5	1.06544	7.98999	11.6998	1.21476e-27	1.06441e-26	51.6808
ADCY3	1.04473	3.46623	11.6986	1.22786e-27	1.07542e-26	51.6701
CDCA8	1.02575	2.76417	11.6949	1.26866e-27	1.10974e-26	51.6377
KIF11	1.05534	7.91671	11.6897	1.32939e-27	1.16088e-26	51.5912
ZNF367	1.07955	3.06571	11.6861	1.37354e-27	1.19791e-26	51.5588
GRB7	1.4648	8.40427	11.6814	1.43159e-27	1.24642e-26	51.5177
SPIN4	1.09063	-1.13221	11.6746	1.5216e-27	1.3231e-26	51.4572
ASNS	1.25896	4.5375	11.65	1.89438e-27	1.63754e-26	51.2396
MSL3L2	1.24293	6.13153	11.6307	2.25187e-27	1.93922e-26	51.068
NEK5	2.23066	0.850939	11.6275	2.31669e-27	1.9942e-26	51.0398
KIF26B	2.97187	4.92765	11.6058	2.80863e-27	2.40355e-26	50.8487
CDC25A	1.24654	4.38557	11.6011	2.93109e-27	2.50521e-26	50.8063
NOX4	2.87403	-0.927495	11.5795	3.55104e-27	3.02e-26	50.6158
DHRS2	2.99319	3.39622	11.5786	3.58045e-27	3.04123e-26	50.6076
LOC642846	1.35895	5.92837	11.5739	3.73272e-27	3.16664e-26	50.5663
C10orf35	1.32707	-3.24513	11.5563	4.36539e-27	3.69117e-26	50.4109
PPP2R3B	1.19903	-0.804714	11.5495	4.63529e-27	3.91133e-26	50.3513
SUZ12P	1.01529	-1.98688	11.5428	4.9202e-27	4.14662e-26	50.2921
CCDC34	1.02351	4.58975	11.541	4.99927e-27	4.21153e-26	50.2763
DDX27	1.19658	2.94727	11.5408	5.00781e-27	4.217e-26	50.2746
PFDN4	1.29413	1.93798	11.5406	5.01514e-27	4.22144e-26	50.2731
KIF15	1.11245	6.97438	11.5333	5.34984e-27	4.49763e-26	50.209
C10orf81	2.32921	7.32034	11.5255	5.73673e-27	4.81304e-26	50.1397
C9orf100	1.09428	5.61852	11.522	5.91704e-27	4.95824e-26	50.109
PLK4	1.02809	5.67304	11.514	6.34939e-27	5.31619e-26	50.039
EBPL	1.06667	8.01341	11.5134	6.38604e-27	5.34469e-26	50.0333
RNFT2	1.58129	4.2769	11.4886	7.95494e-27	6.6173e-26	49.8152
SNHG3	1.43519	-3.76447	11.4828	8.37564e-27	6.95651e-26	49.7641
ANGPT2	1.48301	4.17172	11.4806	8.53798e-27	7.08507e-26	49.745
CLEC5A	2.82278	-0.203922	11.4792	8.64605e-27	7.16896e-26	49.7325
MFAP2	2.1418	-4.45677	11.4779	8.74869e-27	7.24821e-26	49.7208
TIGD4	1.43807	-1.64781	11.4762	8.88034e-27	7.35135e-26	49.706
ATP6V1E2	1.16466	3.4494	11.4716	9.24745e-27	7.64292e-26	49.6658
SCML1	1.4853	1.39289	11.4617	1.00923e-26	8.32444e-26	49.579
KIAA1274	1.82533	2.93715	11.4589	1.03435e-26	8.52477e-26	49.5546
CHCHD6	1.02244	-2.46765	11.4505	1.1141e-26	9.15997e-26	49.4809
SHH	2.03395	5.06456	11.4497	1.12231e-26	9.22007e-26	49.4736
CCDC113	1.57406	1.74231	11.4327	1.30374e-26	1.06722e-25	49.3249
KIAA0907	1.05359	-0.184885	11.4316	1.31723e-26	1.0774e-25	49.3147
MEST	1.00953	3.81422	11.4219	1.43491e-26	1.17225e-25	49.2297
NSUN5P1	1.80409	5.95534	11.4183	1.48143e-26	1.20881e-25	49.1981
ICA1	1.00494	8.73826	11.3986	1.76224e-26	1.43112e-25	49.0258
XKRX	2.10367	4.05049	11.3795	2.0859e-26	1.68929e-25	48.8584
GPR172A	1.00982	3.42064	11.3779	2.1157e-26	1.71275e-25	48.8444
RAET1K	1.76377	-5.27258	11.3654	2.36112e-26	1.90317e-25	48.7354
COMP	5.08204	-0.419983	11.3565	2.55433e-26	2.05568e-25	48.6574
BHLHE40	1.2844	3.59142	11.3542	2.606e-26	2.09644e-25	48.6375
CDT1	1.21652	1.87818	11.3512	2.67464e-26	2.14998e-25	48.6117
MC1R	1.47781	-2.59816	11.3418	2.90533e-26	2.33176e-25	48.5296
OVGP1	1.53058	5.48068	11.3416	2.91202e-26	2.33621e-25	48.5273
LEPRE1	1.06755	2.45183	11.3268	3.31741e-26	2.65522e-25	48.398
GSDMC	1.66765	-7.41267	11.3138	3.71795e-26	2.96081e-25	48.2848
IRX5	2.89695	0.0316857	11.3129	3.74727e-26	2.983e-25	48.277
GINS4	1.27075	-2.53427	11.3067	3.95612e-26	3.14194e-25	48.2232
NSUN5P2	1.72754	0.0679554	11.3028	4.09431e-26	3.24885e-25	48.1892
PTP4A3	1.94053	2.77886	11.3012	4.15344e-26	3.29356e-25	48.1749
PIF1	1.4436	-1.63295	11.2946	4.39972e-26	3.48616e-25	48.1178
TBC1D16	1.13883	0.213522	11.2895	4.59974e-26	3.63902e-25	48.0736
CIT	1.09481	2.1105	11.272	5.3669e-26	4.2329e-25	47.9206
WDHD1	1.05664	4.37812	11.2534	6.3163e-26	4.96644e-25	47.7589
MCM4	1.09011	5.72245	11.2521	6.38959e-26	5.02214e-25	47.7475
DLX4	1.78348	-2.95004	11.2283	7.86607e-26	6.14499e-25	47.5412
SLC22A3	1.93278	0.123348	11.2248	8.11419e-26	6.32919e-25	47.5104
PLAU	1.78877	2.81479	11.2002	1.00598e-25	7.81116e-25	47.2971
POLR3G	1.47981	-0.604081	11.1953	1.04995e-25	8.1372e-25	47.2547
IFITM3	1.3455	2.61448	11.1912	1.08804e-25	8.41339e-25	47.2193
RELL2	1.91569	5.06081	11.188	1.11859e-25	8.63983e-25	47.1918
CPNE1	1.39885	6.47798	11.1643	1.37616e-25	1.05538e-24	46.9862
LOC652276	1.08227	-0.361007	11.1633	1.38769e-25	1.06383e-24	46.978
C15orf23	1.01439	-1.36703	11.1602	1.42667e-25	1.09249e-24	46.9505
RBL1	1.22045	-2.02518	11.1477	1.59074e-25	1.21405e-24	46.8425
SRCRB4D	1.06164	-4.25484	11.1443	1.63756e-25	1.24885e-24	46.8137
SERPINH1	1.04323	-0.00797756	11.1397	1.70583e-25	1.29802e-24	46.7732
MAD2L2	1.00883	2.77291	11.1296	1.86268e-25	1.41318e-24	46.6859
C20orf46	2.46889	4.63157	11.1011	2.38729e-25	1.79791e-24	46.4397
WISP1	2.45011	1.6082	11.0842	2.76435e-25	2.07579e-24	46.2942
ACBD7	1.7755	-3.56353	11.0764	2.95733e-25	2.21584e-24	46.2273
C13orf29	1.76624	-5.32376	11.075	2.99423e-25	2.24267e-24	46.215
RTEL1	1.32901	0.438945	11.0671	3.20652e-25	2.39642e-24	46.147
CMTM7	1.33312	-0.83188	11.0607	3.39106e-25	2.53066e-24	46.0915
GPSM2	1.24929	-0.303344	11.0501	3.7157e-25	2.76689e-24	46.0008
TSEN2	1.051	6.03516	11.0446	3.89803e-25	2.89952e-24	45.9533
TMEM67	1.213	-2.52576	11.0432	3.94565e-25	2.93281e-24	45.9412
PKP1	3.12293	-2.57749	11.026	4.58161e-25	3.38834e-24	45.793
TACC3	1.04876	4.1085	11.0175	4.9311e-25	3.63633e-24	45.7201
KIF4B	1.22984	3.0408	11.0111	5.20887e-25	3.83841e-24	45.6657
GPR19	1.29483	3.05485	11.0103	5.24768e-25	3.86424e-24	45.6583
SNHG6	1.15143	3.46718	11.0004	5.71628e-25	4.20477e-24	45.5735
FMNL2	1.00772	0.993265	10.9831	6.6416e-25	4.86277e-24	45.4246
IFITM1	1.62702	5.63714	10.9757	7.07634e-25	5.17738e-24	45.3618
WNT7B	2.97533	-0.715804	10.9742	7.16764e-25	5.24231e-24	45.349
FAM150A	3	0.675147	10.9724	7.28024e-25	5.32087e-24	45.3336
SNHG11	1.13612	2.46463	10.9555	8.42641e-25	6.13672e-24	45.1885
SIX1	2.44113	-6.24907	10.9543	8.51568e-25	6.19734e-24	45.1781
BRIP1	1.16733	1.7351	10.949	8.91704e-25	6.47795e-24	45.1324
RNF32	1.3006	-2.46677	10.9458	9.16584e-25	6.65399e-24	45.1051
LRRC36	2.67456	-0.818243	10.9114	1.23247e-24	8.88743e-24	44.8114
SLC4A5	1.08116	-3.482	10.9032	1.32358e-24	9.52775e-24	44.7407
CCDC18	1.22294	-0.322275	10.9004	1.35564e-24	9.74829e-24	44.7169
ARHGEF19	1.28969	-0.457883	10.8987	1.37494e-24	9.88015e-24	44.7029
SHROOM4	1.80284	-1.67843	10.8962	1.40482e-24	1.00913e-23	44.6816
AURKAPS1	1.01993	-0.867163	10.8872	1.51838e-24	1.0888e-23	44.6045
CCDC64	1.11526	4.82456	10.8862	1.53157e-24	1.09787e-23	44.5959
KRT6B	4.53591	0.163375	10.8842	1.55808e-24	1.1161e-23	44.5789
CYP2S1	1.31034	4.33091	10.8694	1.76915e-24	1.26201e-23	44.4529
TYRO3	1.60855	-3.10158	10.8643	1.84923e-24	1.31685e-23	44.409
FAM57A	1.09993	7.59274	10.8631	1.86884e-24	1.33035e-23	44.3985
LOC150776	1.04585	6.51148	10.8225	2.64667e-24	1.86466e-23	44.0534
MMP1	3.71436	1.33062	10.8032	3.12286e-24	2.19188e-23	43.8893
CENPW	1.12335	6.57183	10.7943	3.37039e-24	2.35996e-23	43.8137
BGN	2.36354	6.75484	10.7879	3.55996e-24	2.49185e-23	43.7594
DNTTIP1	1.07765	0.122687	10.7862	3.6116e-24	2.52713e-23	43.7451
NXT1	1.08562	-2.94625	10.7798	3.81746e-24	2.66754e-23	43.6901
C13orf23	1.1927	-0.170659	10.7516	4.85816e-24	3.37181e-23	43.4511
SHISA2	2.38872	-4.85718	10.7412	5.30764e-24	3.67507e-23	43.3633
CDKN3	1.17054	-1.08616	10.7335	5.66828e-24	3.91817e-23	43.2981
KLC3	2.32726	2.6971	10.7309	5.79789e-24	4.00372e-23	43.2757
TMPRSS3	2.57383	-2.26691	10.7287	5.90825e-24	4.07856e-23	43.257
SLC12A2	1.3057	8.64345	10.7217	6.26818e-24	4.31831e-23	43.1984
DYX1C1	1.81906	-0.407738	10.7136	6.7197e-24	4.62008e-23	43.1294
KLHL17	1.34537	3.37261	10.7108	6.87923e-24	4.72659e-23	43.1062
KCNH8	2.24718	1.94187	10.7079	7.05592e-24	4.84151e-23	43.081
KLK10	3.75511	0.224786	10.687	8.43062e-24	5.75975e-23	42.9045
HYAL3	1.1477	4.5212	10.6678	9.92883e-24	6.7743e-23	42.7423
ZP3	1.43375	6.88256	10.6667	1.002e-23	6.83421e-23	42.7333
DNAH2	2.50106	1.36848	10.6531	1.12502e-23	7.66566e-23	42.6184
CST2	2.88384	0.229697	10.6466	1.18833e-23	8.0863e-23	42.5642
SP5	2.80142	4.45443	10.6433	1.22221e-23	8.30587e-23	42.5363
KRTAP5-1	1.74722	3.66029	10.6327	1.3379e-23	9.07404e-23	42.4466
PPEF1	1.85102	-6.47836	10.6315	1.35093e-23	9.15633e-23	42.437
NPM3	1.21238	3.19424	10.6273	1.40079e-23	9.48487e-23	42.4011
ANXA9	1.65997	4.35646	10.6102	1.61921e-23	1.0892e-22	42.2574
TNFRSF6B	2.95659	6.58518	10.6021	1.7347e-23	1.16384e-22	42.1891
ARHGAP39	1.021	-1.24985	10.5981	1.79435e-23	1.20268e-22	42.1556
KIAA0895	1.36327	0.361834	10.557	2.54041e-23	1.69059e-22	41.8109
C9orf43	1.43561	-8.76933	10.5511	2.67092e-23	1.77399e-22	41.7612
TNFSF15	1.44168	-3.98504	10.5232	3.37968e-23	2.23031e-22	41.5279
RAET1L	2.43722	1.16012	10.5117	3.72593e-23	2.45407e-22	41.4312
GOLGA7B	2.08018	-1.23094	10.5081	3.84002e-23	2.52678e-22	41.4013
BICD1	1.39022	-0.792278	10.5041	3.97301e-23	2.61094e-22	41.3676
ZNF121	1.15341	-3.72406	10.4943	4.31236e-23	2.82672e-22	41.2863
ARID3A	1.75301	0.0118014	10.4821	4.78156e-23	3.12728e-22	41.184
DMBX1	2.83498	-5.57984	10.4636	5.5885e-23	3.63997e-22	41.0294
LOC388152	1.11704	-0.0434913	10.4631	5.60931e-23	3.65237e-22	41.0257
DSG4	1.81923	0.920802	10.4619	5.66527e-23	3.68646e-22	41.0159
ANKRD23	1.11929	3.1412	10.4554	5.98651e-23	3.88811e-22	40.9612
FAM83H	1.00616	9.33321	10.4524	6.13757e-23	3.98244e-22	40.9365
PRR11	1.3614	-0.311116	10.4462	6.46619e-23	4.19302e-22	40.8848
DDIT4	1.38859	-0.485298	10.4435	6.61243e-23	4.28514e-22	40.8626
C17orf86	1.05106	1.34125	10.4381	6.92442e-23	4.48166e-22	40.8169
CEP250	1.07299	0.678839	10.4375	6.95444e-23	4.49967e-22	40.8127
LDLRAD3	1.75126	5.08902	10.4249	7.7313e-23	4.98347e-22	40.7077
PDZD7	1.83756	-7.02198	10.416	8.33593e-23	5.35304e-22	40.6331
CENPJ	1.04694	4.16022	10.4062	9.05039e-23	5.7901e-22	40.5516
MIF	1.1284	2.41788	10.3872	1.06109e-22	6.7632e-22	40.3939
ZNF593	1.04317	0.863327	10.3858	1.0733e-22	6.8389e-22	40.3826
SLC17A9	2.09078	0.0367071	10.3807	1.12044e-22	7.12594e-22	40.34
LOC286467	2.91582	-2.27886	10.3632	1.29726e-22	8.2149e-22	40.1947
KCTD14	1.21123	6.36871	10.3305	1.70527e-22	1.07754e-21	39.9237
FAM111B	1.2132	-1.26461	10.3258	1.77271e-22	1.11774e-21	39.8853
SRPX2	2.48912	-3.74249	10.322	1.83085e-22	1.15298e-21	39.8533
CDC7	1.11678	-1.53183	10.3126	1.97911e-22	1.24141e-21	39.7761
ADAMTS12	2.83773	1.45112	10.3037	2.1322e-22	1.33417e-21	39.7023
TNNI3	3.13662	-0.540669	10.2977	2.24162e-22	1.40135e-21	39.6527
EIF4EBP1	1.12413	0.0313928	10.2908	2.37351e-22	1.48155e-21	39.5961
ALDH4A1	1.47579	7.42572	10.2808	2.58083e-22	1.60413e-21	39.5131
SPNS3	1.51697	1.2745	10.2643	2.96151e-22	1.83519e-21	39.3768
C8orf51	1.65066	-1.61749	10.2501	3.33185e-22	2.05661e-21	39.26
SERPINA4	3.02883	2.29353	10.2264	4.05766e-22	2.49412e-21	39.0647
SPNS2	1.52964	1.15651	10.2213	4.23289e-22	2.60028e-21	39.0228
RRP7B	1.07635	5.399	10.2167	4.39907e-22	2.69994e-21	38.9847
C9orf169	1.90763	-5.73736	10.2061	4.80112e-22	2.94054e-21	38.898
CLSPN	1.40296	2.80659	10.2038	4.89447e-22	2.99682e-21	38.879
RAB15	1.12449	8.87098	10.2032	4.9177e-22	3.01015e-21	38.8743
ATAD3B	1.19405	-0.00807816	10.2021	4.96155e-22	3.03609e-21	38.8655
EFNA3	1.59726	6.28919	10.1851	5.71219e-22	3.48193e-21	38.7259
C2orf27A	1.60999	-4.78004	10.1771	6.10701e-22	3.71597e-21	38.6597
TMEM105	2.06188	1.93338	10.177	6.11279e-22	3.71839e-21	38.6587
TBX15	2.04106	-3.98854	10.1757	6.17912e-22	3.75762e-21	38.648
KRT7	2.5721	0.325805	10.1605	7.00463e-22	4.24956e-21	38.5238
?|155060	1.25976	-0.980118	10.1459	7.90309e-22	4.7791e-21	38.4043
MCM8	1.09974	-1.41044	10.143	8.09567e-22	4.89267e-21	38.3804
TACSTD2	3.34203	-0.825784	10.1068	1.09112e-21	6.54608e-21	38.0847
FAM64A	1.20528	6.1673	10.1055	1.10333e-21	6.6116e-21	38.0737
SERPINE1	2.28197	2.37913	10.0991	1.16279e-21	6.95778e-21	38.0217
FOXA2	1.44583	1.92438	10.092	1.23344e-21	7.36978e-21	37.9633
FERMT1	1.28825	10.4035	10.077	1.39485e-21	8.3052e-21	37.8415
C8orf73	1.81689	6.26081	10.0732	1.43899e-21	8.56553e-21	37.8106
PPP1R13L	1.04639	6.58501	10.0717	1.45772e-21	8.66696e-21	37.7978
OLR1	2.79984	-3.71773	10.0658	1.53004e-21	9.08644e-21	37.7498
DLEU2	1.34229	-2.43558	10.0622	1.57523e-21	9.34399e-21	37.721
SNHG12	1.20812	5.71125	10.0525	1.70688e-21	1.01103e-20	37.6415
LOC349114	1.24673	1.38414	10.0524	1.70804e-21	1.01143e-20	37.6408
LY6G6E	2.34832	0.535071	10.032	2.01947e-21	1.19343e-20	37.4749
PILRB	1.40228	4.80656	10.0318	2.02272e-21	1.19501e-20	37.4733
KLK7	4.06763	-4.55716	10.0119	2.38154e-21	1.40175e-20	37.3116
WBSCR28	1.4661	1.58605	9.94814	4.01249e-21	2.33163e-20	36.7949
LOXL2	1.53655	7.54424	9.92945	4.67366e-21	2.70816e-20	36.6439
FAM156A	1.07423	0.289513	9.9113	5.41929e-21	3.1261e-20	36.4973
AURKB	1.04764	5.32336	9.90904	5.51995e-21	3.18238e-20	36.4791
LOC100127888	2.76559	2.70453	9.86877	7.65991e-21	4.36828e-20	36.1546
CCNA2	1.04526	-0.392504	9.86767	7.72914e-21	4.40653e-20	36.1457
CXCL11	2.92519	-0.42191	9.86405	7.95943e-21	4.53279e-20	36.1167
DNAH5	1.95611	-3.92587	9.85487	8.57604e-21	4.87718e-20	36.0428
CPXM1	1.94971	-0.0614376	9.85115	8.83855e-21	5.0209e-20	36.0129
FOXS1	1.53867	-2.4523	9.84247	9.48425e-21	5.38026e-20	35.9431
THSD1P1	1.39618	0.717839	9.84071	9.62068e-21	5.45314e-20	35.929
KLHL31	1.57691	-3.97059	9.84039	9.64529e-21	5.46558e-20	35.9264
MMP13	3.16398	1.49299	9.83991	9.68289e-21	5.48537e-20	35.9226
PRIC285	1.10621	7.70037	9.81627	1.17287e-20	6.61147e-20	35.7328
CHAC1	1.40332	-4.39915	9.81129	1.22111e-20	6.87963e-20	35.6929
TMPRSS13	2.77819	-0.438699	9.80351	1.30045e-20	7.31662e-20	35.6306
ZNF251	1.09921	-0.455901	9.79902	1.34867e-20	7.5775e-20	35.5945
IL20RA	1.24837	3.20768	9.79465	1.39715e-20	7.84128e-20	35.5596
SPOCD1	1.90535	-0.987855	9.77159	1.68349e-20	9.39185e-20	35.375
C1orf182	1.26727	-4.88922	9.73995	2.17318e-20	1.20387e-19	35.1222
CORIN	2.51622	2.0351	9.73283	2.30153e-20	1.2712e-19	35.0654
C2	1.51488	7.80553	9.72287	2.49386e-20	1.3741e-19	34.986
KAL1	2.42594	2.41385	9.72064	2.53898e-20	1.39859e-19	34.9682
IRAK2	1.49086	4.5544	9.7116	2.73061e-20	1.49892e-19	34.8962
EPR1	1.29347	7.0974	9.7062	2.85183e-20	1.56337e-19	34.8532
PLS3	1.10989	3.72273	9.69893	3.0235e-20	1.65571e-19	34.7953
TXLNG	1.01813	-2.07307	9.68195	3.46569e-20	1.89331e-19	34.6602
PVRL4	1.74561	6.25652	9.66642	3.92569e-20	2.13835e-19	34.5369
AXIN2	1.99066	1.76378	9.65056	4.45817e-20	2.42133e-19	34.411
PCMTD2	1.00996	0.912958	9.63012	5.2512e-20	2.83703e-19	34.2489
CLDN14	2.17032	0.724834	9.6188	5.74907e-20	3.10111e-19	34.1593
GSG2	1.04787	-2.62175	9.61848	5.76384e-20	3.10826e-19	34.1567
ARHGAP11A	1.00058	6.47853	9.6053	6.40455e-20	3.44654e-19	34.0524
DNASE1L2	1.5759	-3.73413	9.60306	6.52018e-20	3.50693e-19	34.0347
PITX1	1.18928	6.36124	9.59697	6.84515e-20	3.67689e-19	33.9866
GABRE	1.97091	0.020736	9.59124	7.16612e-20	3.84227e-19	33.9412
CDC20	1.03711	6.59034	9.58996	7.2394e-20	3.87953e-19	33.9312
TCN1	4.46966	-4.24827	9.58785	7.36231e-20	3.94437e-19	33.9145
TAS2R38	1.69047	-3.08863	9.58666	7.43292e-20	3.97909e-19	33.9051
C6orf48	1.00568	4.3192	9.58624	7.45742e-20	3.99116e-19	33.9018
MGC72080	1.14633	-2.03978	9.57642	8.06549e-20	4.30985e-19	33.8242
LIPG	1.25444	0.638512	9.5758	8.10583e-20	4.33028e-19	33.8193
COL1A1	2.2835	4.19455	9.57188	8.36308e-20	4.46306e-19	33.7884
SP6	1.76598	1.46214	9.55739	9.38692e-20	4.99128e-19	33.6741
LOC100130015	1.36512	2.16456	9.55196	9.80183e-20	5.20921e-19	33.6313
CCDC138	1.07743	-1.77319	9.52793	1.18671e-19	6.2727e-19	33.4421
TM4SF19	2.13889	1.01242	9.51859	1.27824e-19	6.74262e-19	33.3686
C13orf27	1.17922	-0.67908	9.51463	1.31909e-19	6.95274e-19	33.3374
EPHA1	1.0504	0.312176	9.50802	1.3902e-19	7.31066e-19	33.2855
C9orf116	1.33586	1.15201	9.50773	1.39332e-19	7.32517e-19	33.2833
CLCN5	1.03219	0.575494	9.50409	1.43419e-19	7.53234e-19	33.2547
KISS1	1.97912	1.19351	9.49301	1.56603e-19	8.20587e-19	33.1676
IBSP	2.97214	-8.78453	9.48848	1.62332e-19	8.49741e-19	33.1321
CYP2D7P1	1.89712	-3.45945	9.4725	1.84249e-19	9.61525e-19	33.0068
DSCR6	2.60058	1.19884	9.45728	2.07857e-19	1.08088e-18	32.8875
HES6	1.40712	7.6045	9.45526	2.11196e-19	1.09769e-18	32.8717
KDELC1	1.11119	5.47925	9.43923	2.39743e-19	1.24322e-18	32.7463
LZTS1	1.60198	-1.99587	9.43436	2.4916e-19	1.2914e-18	32.7082
ZNF860	1.05634	-1.74279	9.43428	2.49309e-19	1.29152e-18	32.7076
PODXL2	1.27994	0.585255	9.42353	2.7142e-19	1.4043e-18	32.6235
XIRP1	2.16219	-1.89467	9.39241	3.46934e-19	1.7851e-18	32.3807
FGF18	1.72644	3.61782	9.39053	3.52091e-19	1.80982e-18	32.3661
MPP3	1.46813	1.84093	9.38964	3.54593e-19	1.82177e-18	32.3591
KLK8	3.79076	0.214686	9.38288	3.73973e-19	1.91942e-18	32.3065
CCDC148	1.49398	-4.1267	9.37904	3.8546e-19	1.97689e-18	32.2765
SLCO1B3	4.22743	-4.00936	9.35312	4.72607e-19	2.41119e-18	32.0749
PMS2L3	1.01992	-2.5693	9.35157	4.784e-19	2.43953e-18	32.0629
CLDN16	1.7195	-7.56793	9.34584	5.0045e-19	2.55007e-18	32.0183
LRRC16B	1.86985	-2.35087	9.34481	5.04498e-19	2.56879e-18	32.0103
MGC16121	1.78634	-6.13607	9.34467	5.05046e-19	2.57094e-18	32.0093
PTK7	1.69362	3.71688	9.33725	5.35357e-19	2.72186e-18	31.9516
LOC84931	1.83694	-3.55472	9.31197	6.5277e-19	3.29758e-18	31.7555
SNHG7	1.07652	-0.612948	9.30425	6.93451e-19	3.49706e-18	31.6957
COL4A1	1.44768	8.57783	9.30044	7.14476e-19	3.59691e-18	31.6662
MYADML2	2.73899	0.383987	9.29844	7.25742e-19	3.65094e-18	31.6507
HSF4	1.71976	3.3609	9.28801	7.87468e-19	3.94985e-18	31.5699
FER1L4	2.61947	5.16504	9.25309	1.03451e-18	5.15374e-18	31.3001
HSD17B7P2	1.07467	4.37395	9.24615	1.09206e-18	5.43385e-18	31.2466
C2orf48	1.73413	-7.23348	9.23602	1.18184e-18	5.86918e-18	31.1684
FGF19	3.49009	-4.78882	9.22673	1.27056e-18	6.29453e-18	31.0969
C12orf70	1.11829	-5.94227	9.22236	1.31457e-18	6.50629e-18	31.0632
VASH2	1.33084	-0.961152	9.2183	1.35679e-18	6.70718e-18	31.0319
FAM92A1	1.46737	5.14589	9.20793	1.47083e-18	7.25345e-18	30.9521
SKA1	1.10336	-0.398466	9.20204	1.53981e-18	7.58999e-18	30.9068
RPS21	1.01235	3.32399	9.17235	1.93915e-18	9.51729e-18	30.6788
NEB	2.21245	-2.76469	9.14403	2.41523e-18	1.1789e-17	30.4617
RTKN2	1.00418	-4.04813	9.12103	2.88579e-18	1.40341e-17	30.2858
ZNF37B	1.05847	2.96882	9.11863	2.93994e-18	1.42857e-17	30.2674
PTTG3P	1.11567	-4.53647	9.11778	2.95931e-18	1.4373e-17	30.2609
TDGF3	2.34086	-1.42814	9.11166	3.10256e-18	1.50403e-17	30.2142
LOC151162	1.05127	5.60477	9.1017	3.35067e-18	1.62086e-17	30.1381
HECW2	1.39987	-4.37273	9.0997	3.40272e-18	1.64488e-17	30.1229
LY6G6F	1.73233	1.06755	9.0914	3.62779e-18	1.7512e-17	30.0596
POLE2	1.06202	5.78104	9.09032	3.65817e-18	1.7642e-17	30.0513
ONECUT2	2.12261	-3.65342	9.08862	3.70664e-18	1.78674e-17	30.0383
ASB9	1.73431	-2.84105	9.08757	3.73662e-18	1.80035e-17	30.0303
DSG1	1.683	-7.06644	9.08217	3.89568e-18	1.87522e-17	29.9891
CENPK	1.07216	-2.23734	9.07587	4.0895e-18	1.96622e-17	29.9411
NME1-NME2	1.29941	1.80458	9.07476	4.12457e-18	1.98215e-17	29.9327
MST1	1.72499	-4.23204	9.07353	4.16398e-18	2.00062e-17	29.9233
TP73	1.96422	-2.5931	9.06817	4.33935e-18	2.08196e-17	29.8825
COL27A1	2.1234	-2.7862	9.06189	4.55434e-18	2.18306e-17	29.8347
GAS5	1.06699	2.08526	9.04982	4.99783e-18	2.39006e-17	29.7429
KCNQ1OT1	1.45717	2.91711	9.04911	5.02497e-18	2.40193e-17	29.7375
GINS2	1.03998	7.04027	9.03792	5.4764e-18	2.61406e-17	29.6525
DKK4	3.24222	-6.34273	9.03183	5.73909e-18	2.73817e-17	29.6062
RAD51AP2	1.36956	-0.95677	9.02613	5.99555e-18	2.85522e-17	29.563
C5orf46	2.20981	-6.63624	9.01874	6.3455e-18	3.01628e-17	29.5069
DUSP2	1.26237	5.02922	9.01601	6.48031e-18	3.07751e-17	29.4861
LBX2	1.19012	2.71167	9.0093	6.82222e-18	3.23539e-17	29.4353
UCA1	3.10383	1.50862	8.99355	7.69777e-18	3.63969e-17	29.316
WDR27	1.08119	5.54023	8.97945	8.57544e-18	4.0435e-17	29.2093
LGR5	2.36804	7.91237	8.97805	8.66764e-18	4.08509e-17	29.1987
PHLDA2	1.19144	-0.3133	8.97273	9.02766e-18	4.25184e-17	29.1585
RPLP0P2	1.30131	-0.728529	8.97189	9.08621e-18	4.27844e-17	29.1521
C19orf26	1.7385	0.509362	8.97143	9.11798e-18	4.29241e-17	29.1486
SERPINB5	2.8957	7.80209	8.95714	1.01708e-17	4.77272e-17	29.0406
LRRC46	1.17277	1.93613	8.95116	1.06454e-17	4.98974e-17	28.9956
FAM53A	1.297	-1.24099	8.95061	1.06906e-17	5.00976e-17	28.9914
RPL22L1	1.58038	-0.187385	8.91916	1.35893e-17	6.32419e-17	28.7543
SLC6A20	2.89869	1.03306	8.91588	1.39329e-17	6.47741e-17	28.7296
DUSP4	2.34297	4.47615	8.90097	1.56068e-17	7.23924e-17	28.6175
MYEOV	2.49638	1.23664	8.89066	1.68801e-17	7.81043e-17	28.54
KRT15	1.57979	-1.46348	8.88323	1.78612e-17	8.25137e-17	28.4842
AGT	1.79875	2.71286	8.87098	1.96031e-17	9.02764e-17	28.3923
ADAMTS4	1.83999	-1.74614	8.87065	1.96519e-17	9.04807e-17	28.3898
NANOS3	2.40132	-6.64442	8.85823	2.15943e-17	9.92236e-17	28.2967
FAM71E1	1.10581	4.22003	8.83147	2.64467e-17	1.20978e-16	28.0965
DTNB	1.10002	-0.659842	8.82132	2.85587e-17	1.3032e-16	28.0206
COL12A1	1.78914	8.83319	8.81543	2.98592e-17	1.36073e-16	27.9766
FCN3	1.44307	-5.83327	8.81162	3.07301e-17	1.39917e-16	27.9482
KIF21B	1.17551	7.5822	8.79768	3.41441e-17	1.55152e-16	27.8441
PMEPA1	1.56718	4.7223	8.79621	3.4525e-17	1.56814e-16	27.8331
GOLT1A	1.35505	3.65534	8.78659	3.71224e-17	1.68314e-16	27.7615
LY6G6C	2.11149	-7.02052	8.78444	3.77312e-17	1.71036e-16	27.7454
SH2D5	1.75371	-7.49119	8.76146	4.48641e-17	2.02431e-16	27.5744
SNORA39	1.32272	2.26985	8.7578	4.61176e-17	2.0795e-16	27.5472
SLC35E4	1.13408	0.858748	8.75504	4.70858e-17	2.12129e-16	27.5267
YY2	1.02376	-0.00179206	8.74694	5.0043e-17	2.25056e-16	27.4665
ACSL6	3.29421	4.85665	8.73983	5.27915e-17	2.37054e-16	27.4137
ALG1L	1.53147	4.4207	8.72904	5.7247e-17	2.56499e-16	27.3337
DUSP5P	1.67064	-6.79937	8.71209	6.50118e-17	2.90719e-16	27.2081
GPR4	1.07489	-2.68126	8.68367	8.04385e-17	3.57601e-16	26.9978
GSDMA	2.09934	3.54253	8.67379	8.66092e-17	3.84534e-16	26.9248
KRT75	3.01561	-2.87835	8.67168	8.7989e-17	3.90407e-16	26.9092
UBD	2.33469	-0.47468	8.66253	9.42158e-17	4.17134e-16	26.8417
INHBE	1.30353	-6.42532	8.65407	1.00356e-16	4.42887e-16	26.7793
SLC22A11	2.93666	0.50204	8.65354	1.00755e-16	4.44551e-16	26.7754
FEZF1	3.19265	2.07153	8.64542	1.07052e-16	4.71827e-16	26.7156
PAH	3.42194	2.59882	8.64527	1.07172e-16	4.72258e-16	26.7144
CDR2L	1.14822	6.65373	8.64144	1.10279e-16	4.85321e-16	26.6862
TNFSF9	2.1644	-2.49033	8.63799	1.13149e-16	4.97633e-16	26.6609
TH	2.17671	-2.1841	8.63768	1.13413e-16	4.98578e-16	26.6586
PSIMCT-1	1.23041	-6.35499	8.63089	1.19299e-16	5.23447e-16	26.6086
TMEM211	2.5142	-2.55537	8.60518	1.44467e-16	6.30372e-16	26.4196
TDGF1	2.53825	0.275113	8.60075	1.4931e-16	6.50952e-16	26.3871
ARHGAP11B	1.0642	4.58084	8.59816	1.52214e-16	6.63329e-16	26.3681
KCNJ11	1.15681	3.54951	8.58675	1.65671e-16	7.19987e-16	26.2844
CDCA2	1.11768	6.00808	8.57583	1.79663e-16	7.79313e-16	26.2044
CCDC74A	1.12463	-3.70616	8.57541	1.80232e-16	7.81615e-16	26.2013
CXCL2	1.92614	2.44966	8.56942	1.88409e-16	8.16041e-16	26.1575
ENGASE	1.2334	8.64056	8.5692	1.8872e-16	8.17043e-16	26.1558
BMP4	1.53848	-0.0939911	8.54388	2.27663e-16	9.80473e-16	25.9706
C6orf15	3.34843	2.34836	8.5338	2.45284e-16	1.05349e-15	25.8971
RDH16	1.56143	-2.35284	8.52214	2.67363e-16	1.14664e-15	25.812
ADAMTSL5	1.18559	-3.06088	8.51244	2.87226e-16	1.22926e-15	25.7412
SYT7	1.60342	0.700363	8.50621	3.00728e-16	1.2857e-15	25.6959
PODNL1	1.44613	-1.89117	8.49302	3.31466e-16	1.41212e-15	25.5999
AMELX	1.66372	1.45852	8.49242	3.32919e-16	1.41801e-15	25.5955
PROX1	1.68694	-4.69704	8.45739	4.30864e-16	1.82384e-15	25.341
CPA4	1.63933	-7.82206	8.45014	4.54427e-16	1.92081e-15	25.2885
EDNRA	1.58377	-2.01364	8.43895	4.9333e-16	2.0831e-15	25.2074
SLC2A1	1.3262	4.02559	8.42872	5.31767e-16	2.24034e-15	25.1334
HSP90AB2P	1.22733	-3.11256	8.4264	5.40896e-16	2.27646e-15	25.1166
SLC11A1	1.87096	-2.55057	8.41674	5.80568e-16	2.43246e-15	25.0468
SIX4	1.82459	2.94903	8.41517	5.87272e-16	2.46005e-15	25.0354
NXPH4	2.67865	-4.67697	8.40822	6.1795e-16	2.58434e-15	24.9852
KRTAP5-4	1.08268	-5.72718	8.4073	6.2214e-16	2.60133e-15	24.9785
AKR1C4	2.59995	-5.25478	8.39693	6.71171e-16	2.80064e-15	24.9037
REM2	1.19745	-5.00492	8.38917	7.10346e-16	2.95929e-15	24.8477
C1orf180	1.94315	-1.96127	8.37898	7.65262e-16	3.18162e-15	24.7742
LOH3CR2A	1.1296	2.11947	8.37762	7.72871e-16	3.2113e-15	24.7645
KRT16	2.79219	-6.96247	8.37641	7.7974e-16	3.23853e-15	24.7557
SRCIN1	1.54756	5.55742	8.37536	7.8572e-16	3.26271e-15	24.7482
WT1	2.9123	-2.92539	8.37506	7.87449e-16	3.26923e-15	24.746
SLAMF9	1.78278	-0.994332	8.37173	8.0682e-16	3.3483e-15	24.7221
NOTCH3	1.35217	8.06086	8.36892	8.23554e-16	3.4136e-15	24.7018
RFX8	1.05257	-6.58036	8.34932	9.50026e-16	3.92277e-15	24.5609
MYOM3	2.21995	2.68722	8.33492	1.05507e-15	4.34602e-15	24.4574
FAM131C	1.63262	-4.20442	8.33366	1.06477e-15	4.38424e-15	24.4484
C2orf61	1.08761	-5.65678	8.33176	1.07962e-15	4.44358e-15	24.4347
HIST1H1E	1.27502	-3.69399	8.31937	1.18131e-15	4.8485e-15	24.3459
C8ORFK29	1.71017	-6.00354	8.3058	1.3037e-15	5.33334e-15	24.2487
DOK7	1.74002	2.37574	8.29238	1.43702e-15	5.85589e-15	24.1526
UNC93A	2.82438	-3.62296	8.29016	1.46027e-15	5.94829e-15	24.1368
MMP10	2.68527	-4.2525	8.28599	1.5051e-15	6.12241e-15	24.107
EPHB3	1.46084	2.09719	8.2756	1.62272e-15	6.59168e-15	24.0328
PIWIL1	3.15056	3.81467	8.25642	1.86423e-15	7.55034e-15	23.8959
IGFL4	1.65844	-7.33708	8.25552	1.87649e-15	7.59699e-15	23.8895
CNIH3	1.6429	-4.18335	8.2494	1.96129e-15	7.93093e-15	23.8459
GAS2	1.69524	-0.250564	8.24362	2.04485e-15	8.26067e-15	23.8047
CXCL5	3.47369	4.9768	8.2197	2.42998e-15	9.78187e-15	23.6346
C9orf163	1.04699	-5.84646	8.21811	2.45796e-15	9.8906e-15	23.6233
DSG3	3.44087	-3.30522	8.20951	2.615e-15	1.05081e-14	23.5622
C10orf55	1.19936	-5.77493	8.18642	3.08743e-15	1.2363e-14	23.3985
DIO2	1.70245	-2.4124	8.16407	3.62446e-15	1.44542e-14	23.2403
ELFN1	1.08973	-4.24821	8.13519	4.45745e-15	1.76834e-14	23.0364
KIFC2	1.26272	-0.673415	8.12887	4.66351e-15	1.84616e-14	22.9918
DLEU7	1.14635	-3.98166	8.12339	4.84994e-15	1.91885e-14	22.9532
CACNA1D	1.35717	4.46957	8.08888	6.20376e-15	2.43757e-14	22.7105
C1orf104	1.14671	3.65344	8.08356	6.44366e-15	2.52893e-14	22.6731
PLAGL2	1.07571	6.27418	8.06698	7.2505e-15	2.83421e-14	22.5568
KCP	1.37603	2.84345	8.04637	8.39392e-15	3.27245e-14	22.4125
LRRN4	1.5785	-1.91775	8.04519	8.46409e-15	3.29918e-14	22.4043
HOXB8	2.36088	5.91229	8.02033	1.00955e-14	3.91871e-14	22.2306
LY6G6D	4.21246	-0.530419	8.01932	1.01679e-14	3.94531e-14	22.2236
PLAC4	1.9419	-3.44215	8.00922	1.09216e-14	4.23058e-14	22.1531
C20orf151	1.24823	6.92553	7.99096	1.24259e-14	4.79159e-14	22.026
F12	1.08918	-0.751282	7.9795	1.34733e-14	5.1867e-14	21.9462
CEL	3.628	-0.655601	7.97215	1.41907e-14	5.45369e-14	21.8951
ANKRD36B	1.03118	-4.58437	7.96097	1.53532e-14	5.88722e-14	21.8175
MATN3	2.10922	-4.79079	7.95155	1.64067e-14	6.27829e-14	21.7522
TM4SF1	1.04657	-0.0818414	7.95048	1.65301e-14	6.32431e-14	21.7448
C20orf134	1.06847	2.72739	7.94619	1.70375e-14	6.51238e-14	21.715
PRSS33	2.93701	-4.2812	7.94084	1.76909e-14	6.75207e-14	21.6779
PPAPDC1A	2.35155	-4.33923	7.93286	1.87109e-14	7.13061e-14	21.6227
DUSP10	1.01266	1.66602	7.93254	1.87537e-14	7.14443e-14	21.6204
SCARNA12	1.0088	-5.77407	7.92787	1.93785e-14	7.37835e-14	21.5881
REEP6	1.38516	3.63704	7.925	1.97728e-14	7.5257e-14	21.5683
ADAMTS14	1.19166	3.31515	7.91988	2.04965e-14	7.79102e-14	21.5329
KRT6A	3.29874	-0.89354	7.90925	2.20833e-14	8.37404e-14	21.4594
CBWD3	1.01235	0.737084	7.88912	2.54284e-14	9.59994e-14	21.3205
LOC554202	2.10702	-3.13301	7.84758	3.39871e-14	1.27281e-13	21.0348
GBX2	1.51083	0.936679	7.84379	3.48976e-14	1.30619e-13	21.0087
ARHGAP33	1.05084	-1.51353	7.83825	3.62716e-14	1.35663e-13	20.9707
SLC9A5	1.06124	-2.75091	7.83512	3.70715e-14	1.3858e-13	20.9492
COL22A1	1.92822	-3.12174	7.82469	3.98632e-14	1.48771e-13	20.8777
SPDYC	1.82848	-5.88414	7.82062	4.10062e-14	1.52926e-13	20.8499
DUSP9	1.89949	-1.49006	7.81796	4.17744e-14	1.55678e-13	20.8316
ALDH3B2	2.12213	-5.79468	7.80844	4.46301e-14	1.65898e-13	20.7665
CITED1	1.75943	-1.79131	7.79099	5.03764e-14	1.86414e-13	20.6473
LCN12	1.60347	-3.39851	7.78996	5.07401e-14	1.87726e-13	20.6402
GJA3	1.69833	0.720425	7.78701	5.17866e-14	1.91495e-13	20.6201
LOC440925	1.77485	-2.07775	7.78612	5.21088e-14	1.92617e-13	20.614
NPFFR1	1.22547	-5.76081	7.78466	5.26394e-14	1.94508e-13	20.604
KRT6C	2.30235	-4.19794	7.76267	6.12973e-14	2.25768e-13	20.4541
GLYATL1	2.21681	-3.97476	7.76074	6.21183e-14	2.28612e-13	20.441
ASGR1	1.7782	4.21574	7.75731	6.3611e-14	2.33954e-13	20.4176
ARMC2	1.11983	3.40414	7.75241	6.58027e-14	2.41583e-13	20.3843
SLCO5A1	1.41797	-0.417564	7.75007	6.68733e-14	2.45425e-13	20.3684
PAX9	2.13524	-3.80792	7.74402	6.97281e-14	2.55765e-13	20.3272
PHKA1	1.18577	2.97706	7.73938	7.19964e-14	2.63803e-13	20.2957
RP1L1	1.31555	-5.54556	7.73208	7.57186e-14	2.76947e-13	20.2461
CTSL2	1.48956	1.91366	7.72658	7.8646e-14	2.87449e-13	20.2087
SLC9A7	1.7377	-0.896864	7.72081	8.18385e-14	2.98508e-13	20.1696
PDPN	1.47293	-0.00220677	7.71861	8.30839e-14	3.02753e-13	20.1547
LOC150197	1.49743	-0.118479	7.71822	8.33113e-14	3.03528e-13	20.152
GPC2	1.27381	-2.09892	7.71109	8.75044e-14	3.18409e-13	20.1037
MMP14	1.09281	4.34607	7.70657	9.02684e-14	3.27944e-13	20.0731
PGF	1.14986	-2.95383	7.68989	1.01238e-13	3.66434e-13	19.9602
TFAP2A	2.1799	-3.79612	7.68899	1.01863e-13	3.68566e-13	19.9541
FKBP10	1.44394	6.19968	7.67978	1.08517e-13	3.92229e-13	19.8918
SLC35D3	2.65202	1.02223	7.67412	1.12809e-13	4.07669e-13	19.8537
HAPLN3	1.40023	0.852823	7.66026	1.24055e-13	4.47207e-13	19.7602
GRM2	1.01051	-5.2667	7.65203	1.31248e-13	4.72559e-13	19.7047
LRRC6	1.35745	0.983556	7.65002	1.33072e-13	4.78956e-13	19.6911
COL5A2	1.52838	1.58363	7.64826	1.34679e-13	4.84569e-13	19.6793
SPON2	1.24084	2.63698	7.64533	1.37412e-13	4.94231e-13	19.6595
C1orf105	1.43528	-7.07794	7.6422	1.40379e-13	5.04636e-13	19.6385
HIST3H2A	1.18213	4.55532	7.62817	1.54516e-13	5.54291e-13	19.5441
FLJ43663	1.09212	3.54264	7.61193	1.72624e-13	6.16773e-13	19.435
COL5A3	1.48578	4.34279	7.60592	1.79839e-13	6.41768e-13	19.3948
KIAA1751	1.45322	-5.47657	7.59909	1.88415e-13	6.71555e-13	19.3489
LPO	2.04835	-6.45228	7.59835	1.89367e-13	6.74715e-13	19.344
KIAA1875	1.64559	-5.55479	7.57573	2.20872e-13	7.84244e-13	19.1926
EPYC	2.74034	-2.45759	7.56445	2.38447e-13	8.45187e-13	19.1172
ZNF280A	1.5624	1.14875	7.56406	2.39084e-13	8.47296e-13	19.1146
SPATA17	1.34534	-3.85215	7.55922	2.47063e-13	8.74519e-13	19.0823
RP1	1.71145	-6.52404	7.51396	3.35646e-13	1.17973e-12	18.7809
GJC3	1.36525	1.80045	7.51251	3.38961e-13	1.19118e-12	18.7713
P4HA3	1.80088	-3.14291	7.51162	3.40994e-13	1.19791e-12	18.7654
TUBB3	1.21696	0.400524	7.50468	3.57362e-13	1.25391e-12	18.7193
TMEM158	1.19363	1.18099	7.50246	3.62752e-13	1.27217e-12	18.7046
NUP210	1.18064	2.71367	7.49476	3.82086e-13	1.33746e-12	18.6535
CFB	1.19119	-0.149339	7.46882	4.55014e-13	1.5849e-12	18.4817
LTB4R	1.06451	-1.86529	7.46148	4.78031e-13	1.66254e-12	18.4332
FZD3	1.16525	2.57421	7.44038	5.5078e-13	1.90812e-12	18.2939
TREM1	2.09433	-3.83139	7.43972	5.53233e-13	1.91565e-12	18.2895
RAET1G	1.19326	-2.43658	7.43913	5.5541e-13	1.92254e-12	18.2857
PRR5-ARHGAP8	1.03411	-0.861628	7.43666	5.64674e-13	1.95362e-12	18.2694
KIFC3	1.107	0.0505921	7.42511	6.10132e-13	2.10663e-12	18.1933
PGC	2.25277	-5.85573	7.42404	6.1451e-13	2.12067e-12	18.1863
C9orf68	1.229	-3.94175	7.40033	7.20118e-13	2.47514e-12	18.0304
RNF39	1.26356	-5.49168	7.39963	7.23467e-13	2.48624e-12	18.0258
COL5A1	1.45358	3.57202	7.39719	7.35374e-13	2.52547e-12	18.0098
TMPRSS5	2.04174	-1.54389	7.38921	7.7559e-13	2.65913e-12	17.9574
THY1	1.24305	4.79201	7.38918	7.75749e-13	2.65923e-12	17.9572
IL1A	1.91086	-4.57716	7.36618	9.04228e-13	3.08676e-12	17.8066
DNAH14	1.48128	-2.7013	7.34713	1.02641e-12	3.49225e-12	17.682
PSORS1C2	1.57163	-6.86962	7.34248	1.05857e-12	3.59807e-12	17.6517
TM7SF4	1.67829	-2.41398	7.33798	1.0907e-12	3.70363e-12	17.6223
TLX1NB	1.06972	-6.07698	7.33535	1.10991e-12	3.76634e-12	17.6052
RRN3P1	1.08821	1.2153	7.31599	1.26188e-12	4.26724e-12	17.4791
CAPN12	1.13702	-2.51751	7.30261	1.37871e-12	4.65083e-12	17.392
DPF1	1.42745	-8.07502	7.29327	1.46655e-12	4.94227e-12	17.3314
LOC100133161	1.13321	-6.94201	7.28338	1.56558e-12	5.27252e-12	17.2672
UCN	1.05161	0.291686	7.2828	1.5715e-12	5.29162e-12	17.2634
AHSA2	1.07016	6.69383	7.28242	1.57548e-12	5.30412e-12	17.261
LOC728554	1.05229	2.42902	7.27509	1.6536e-12	5.55983e-12	17.2134
GCSH	1.21847	3.56558	7.25943	1.83337e-12	6.14818e-12	17.112
SPP1	2.67099	2.62861	7.25843	1.84546e-12	6.18668e-12	17.1056
LY6E	1.34913	1.31793	7.24635	1.99811e-12	6.68642e-12	17.0275
C20orf195	1.31652	-4.53425	7.22531	2.29426e-12	7.65249e-12	16.8917
EN2	2.53059	-0.650183	7.22513	2.29705e-12	7.66056e-12	16.8906
LRRC37A3	1.13514	1.14743	7.21999	2.37576e-12	7.91406e-12	16.8575
CCR8	1.41185	2.09743	7.21646	2.43134e-12	8.09658e-12	16.8347
CDKN2A	1.66582	0.261531	7.2121	2.50192e-12	8.32485e-12	16.8066
TTC9	1.28864	-2.55741	7.21157	2.51058e-12	8.35234e-12	16.8032
ZNF469	1.54195	-0.0296918	7.20984	2.53912e-12	8.44455e-12	16.7921
DACH1	1.74015	-0.384834	7.2069	2.58859e-12	8.6049e-12	16.7732
IER3	1.05691	4.5431	7.20018	2.70505e-12	8.96876e-12	16.73
ABCC2	2.35009	-4.49928	7.1948	2.80188e-12	9.28232e-12	16.6954
MFI2	1.33748	4.85125	7.19321	2.83124e-12	9.37203e-12	16.6852
ADAMTSL2	1.21432	4.84273	7.18809	2.92752e-12	9.6767e-12	16.6524
DHDPSL	1.76814	-6.29807	7.18409	3.00514e-12	9.92208e-12	16.6267
PPM1N	1.29496	0.618316	7.17584	3.17147e-12	1.04578e-11	16.5738
INHBB	1.7255	3.86501	7.17438	3.20181e-12	1.05545e-11	16.5644
KIAA1024	1.07111	3.47718	7.16883	3.31982e-12	1.09277e-11	16.5289
BAAT	1.82162	-6.28057	7.1482	3.79753e-12	1.24721e-11	16.3969
SOX14	1.98049	-0.0327696	7.14059	3.99045e-12	1.30827e-11	16.3482
SULT1C2	1.98637	4.42709	7.13184	4.22381e-12	1.38276e-11	16.2924
SERPINE2	1.22943	7.6005	7.1266	4.37006e-12	1.42907e-11	16.259
CSF2	1.66353	-1.40148	7.12298	4.47418e-12	1.46196e-11	16.2359
SP8	1.9279	-5.10493	7.12051	4.54641e-12	1.48461e-11	16.2202
MMP8	1.80083	0.878306	7.11774	4.62887e-12	1.51082e-11	16.2025
PALM2	1.17359	-1.04343	7.10983	4.87263e-12	1.58937e-11	16.1521
NDUFA4L2	1.36602	-2.52689	7.09497	5.36484e-12	1.74687e-11	16.0577
WNT8B	1.06935	-6.20048	7.08761	5.62654e-12	1.82831e-11	16.0109
LAIR2	1.53499	-2.13961	7.08438	5.74524e-12	1.86482e-11	15.9904
CILP2	1.86722	-6.00233	7.07952	5.92864e-12	1.92286e-11	15.9596
KCNN4	1.28722	5.48152	7.07466	6.11766e-12	1.98245e-11	15.9288
LRRC43	1.36494	-5.87318	7.04677	7.32308e-12	2.36165e-11	15.7523
TNNT2	1.61837	-5.40814	7.04431	7.44013e-12	2.39865e-11	15.7367
RASSF10	1.85213	-2.67468	7.02925	8.19679e-12	2.63721e-11	15.6417
FGA	2.06747	-3.90936	7.00788	9.40215e-12	3.00945e-11	15.507
GJB3	1.32055	7.62242	6.98576	1.08331e-11	3.45668e-11	15.368
GRAMD2	1.39752	-2.57756	6.9732	1.17389e-11	3.73933e-11	15.2893
NOD2	1.23741	-0.490778	6.97078	1.19215e-11	3.79574e-11	15.2741
S100A3	1.34216	3.3665	6.96818	1.21216e-11	3.85585e-11	15.2578
H19	2.40949	6.17425	6.95533	1.31567e-11	4.17475e-11	15.1774
ITGB8	1.02409	-0.949319	6.94682	1.38899e-11	4.39858e-11	15.1242
PMFBP1	1.47354	2.04149	6.92455	1.60045e-11	5.04409e-11	14.9852
S100A5	1.21899	-7.94503	6.91902	1.65767e-11	5.21963e-11	14.9508
AKNAD1	1.28124	-2.60747	6.91238	1.729e-11	5.43924e-11	14.9095
R3HDML	1.34275	-3.59491	6.90728	1.78586e-11	5.6138e-11	14.8777
PALM3	1.88053	0.570965	6.89531	1.92669e-11	6.03432e-11	14.8033
LOC148709	1.12222	-4.97223	6.88246	2.08989e-11	6.52558e-11	14.7236
TTC16	1.1573	-7.83309	6.88031	2.11857e-11	6.61106e-11	14.7102
KLHL29	1.07153	-2.08059	6.86491	2.33507e-11	7.26018e-11	14.6148
SLC6A1	1.12788	2.56629	6.857	2.45446e-11	7.61523e-11	14.5659
C19orf51	1.55589	-4.67055	6.8282	2.94249e-11	9.07456e-11	14.3882
INPP5D	1.0064	3.02799	6.81831	3.1312e-11	9.63626e-11	14.3272
ZIC5	2.91726	-6.86216	6.78983	3.74332e-11	1.1448e-10	14.1522
SEC16B	1.05423	-1.8341	6.77367	4.14136e-11	1.26295e-10	14.0532
TMEM198	1.03663	1.57144	6.76432	4.39052e-11	1.33537e-10	13.996
CLDN9	1.62781	-5.09608	6.76396	4.40038e-11	1.33817e-10	13.9938
CHSY3	1.16204	-0.18814	6.75752	4.58063e-11	1.39113e-10	13.9544
RIPPLY1	1.06503	0.7573	6.73988	5.11276e-11	1.54816e-10	13.8468
RANBP17	1.33489	-3.90844	6.73578	5.24493e-11	1.58654e-10	13.8218
CLCN4	1.36288	0.163079	6.73441	5.29002e-11	1.59947e-10	13.8134
WFDC10B	1.17229	-6.13055	6.73071	5.41321e-11	1.63503e-10	13.7908
SLC2A12	1.26387	-1.73548	6.72604	5.57264e-11	1.68195e-10	13.7624
UCKL1AS	1.14287	-5.74882	6.71787	5.86272e-11	1.76639e-10	13.7127
PCDHGA1	1.03096	-2.01195	6.70447	6.37093e-11	1.91613e-10	13.6312
AREG	1.63511	0.36692	6.69689	6.6772e-11	2.00502e-10	13.5852
PNPLA3	1.95622	-3.91906	6.69087	6.93049e-11	2.07803e-10	13.5488
COL9A3	2.05709	-0.255657	6.68721	7.08946e-11	2.12477e-10	13.5266
TEX19	1.14194	-5.70509	6.68268	7.29078e-11	2.18383e-10	13.4991
MME	1.93792	0.183814	6.67993	7.41611e-11	2.22072e-10	13.4825
CPNE9	1.27025	-8.04021	6.67251	7.76388e-11	2.32114e-10	13.4376
TNFRSF10C	1.16461	-3.41749	6.67001	7.88446e-11	2.35581e-10	13.4225
SLC34A3	1.31538	-5.50356	6.66706	8.02977e-11	2.39783e-10	13.4046
FRMD5	1.46227	-2.37484	6.64984	8.92921e-11	2.65561e-10	13.3006
HEPHL1	2.14063	1.65286	6.64748	9.05964e-11	2.69284e-10	13.2864
ZIC2	2.92361	0.756794	6.64421	9.24412e-11	2.74648e-10	13.2667
FCHO1	1.24412	3.19074	6.63176	9.97986e-11	2.95822e-10	13.1917
LOC285419	1.00688	-5.65109	6.62814	1.02043e-10	3.02214e-10	13.1699
AQP6	1.31477	2.02774	6.62433	1.04459e-10	3.09236e-10	13.147
NXPH1	1.15016	-8.21952	6.6177	1.08802e-10	3.21629e-10	13.1071
CAMKV	2.09016	-5.81376	6.60896	1.14788e-10	3.39274e-10	13.0547
ALOXE3	1.26401	0.77306	6.59957	1.21588e-10	3.59114e-10	12.9984
HIST1H1B	1.08346	-5.49256	6.59082	1.28278e-10	3.78275e-10	12.9459
LOC100272228	1.13801	-3.04358	6.57964	1.37349e-10	4.03576e-10	12.8791
CPLX1	1.17527	-3.03559	6.52497	1.91613e-10	5.58623e-10	12.5532
KCNK9	1.62259	0.441024	6.52014	1.97318e-10	5.74728e-10	12.5245
TERC	1.01787	-7.85393	6.52013	1.97333e-10	5.74728e-10	12.5245
OSM	1.67033	-0.840214	6.51981	1.97717e-10	5.75762e-10	12.5226
TWIST1	1.42279	3.23311	6.51008	2.09731e-10	6.09451e-10	12.4649
C19orf59	1.71493	-1.37509	6.49032	2.36367e-10	6.83852e-10	12.3479
RDM1	1.07448	2.15195	6.48389	2.45736e-10	7.10158e-10	12.3099
OLFML2B	1.31691	1.0637	6.47948	2.52363e-10	7.28183e-10	12.2838
APOC2	1.6462	-2.64315	6.46386	2.77289e-10	7.97304e-10	12.1917
TRPV4	1.25286	3.60996	6.45846	2.86462e-10	8.22873e-10	12.1599
SLC13A3	2.39874	-1.74378	6.40977	3.83729e-10	1.09507e-09	11.874
HKDC1	1.07106	4.5388	6.40394	3.97361e-10	1.13287e-09	11.8399
SYT8	1.54128	0.602338	6.39062	4.30288e-10	1.22132e-09	11.7621
AMH	1.78098	-1.9136	6.38569	4.43137e-10	1.25623e-09	11.7333
PITX2	1.59052	3.43867	6.37803	4.63857e-10	1.31406e-09	11.6886
SLC25A27	1.14695	-1.21162	6.37784	4.64395e-10	1.3154e-09	11.6875
DUSP15	1.53552	-3.96879	6.36861	4.90665e-10	1.38675e-09	11.6337
FGFR4	1.01061	2.9721	6.36698	4.95445e-10	1.39949e-09	11.6242
SULF1	1.58462	5.48889	6.34725	5.57139e-10	1.5675e-09	11.5095
RPSAP52	1.00299	-0.231446	6.34407	5.67759e-10	1.59563e-09	11.4911
KCNH4	1.29483	-6.03198	6.33454	6.00803e-10	1.68527e-09	11.4358
FAM70B	1.29138	0.447841	6.32747	6.26518e-10	1.7562e-09	11.3949
NPM2	1.35079	-3.92242	6.29839	7.44112e-10	2.07619e-09	11.2268
BRSK2	2.11643	3.65522	6.28	8.29329e-10	2.30644e-09	11.1209
TSPO2	1.08759	0.393507	6.2663	8.98977e-10	2.49237e-09	11.0421
NCRNA00105	1.23655	3.83159	6.2657	9.02194e-10	2.50095e-09	11.0386
DSC3	2.53241	4.79545	6.24894	9.95535e-10	2.75375e-09	10.9425
FOXP3	1.25034	-3.99812	6.23272	1.09483e-09	3.02026e-09	10.8496
LRRC15	1.62998	-2.98354	6.23229	1.09759e-09	3.02668e-09	10.8472
HABP2	2.2166	-6.61064	6.2301	1.11176e-09	3.06368e-09	10.8347
SRMS	1.62349	-4.13249	6.2254	1.14276e-09	3.14616e-09	10.8078
SPARC	1.13631	2.90322	6.219	1.18635e-09	3.26179e-09	10.7712
MEGF6	1.32328	-1.51251	6.21762	1.19597e-09	3.28737e-09	10.7634
KREMEN2	1.24026	-3.41874	6.20065	1.32051e-09	3.61998e-09	10.6666
GZMB	1.61101	4.29132	6.19741	1.34569e-09	3.68654e-09	10.6482
BMP7	2.11558	3.74788	6.19442	1.36931e-09	3.75026e-09	10.6312
SLC22A15	1.01369	-3.69464	6.19364	1.37561e-09	3.76652e-09	10.6267
DMRT3	1.24327	-8.23584	6.17944	1.49412e-09	4.08228e-09	10.5461
SBSN	1.1557	-1.65351	6.17864	1.50115e-09	4.10094e-09	10.5415
ELF5	2.67549	-8.57234	6.17469	1.53599e-09	4.19444e-09	10.5191
C7orf52	1.289	-6.46946	6.17237	1.55684e-09	4.24856e-09	10.5059
LOC440356	1.02367	-6.38759	6.16485	1.62637e-09	4.43183e-09	10.4633
CLCN1	1.33931	1.4492	6.15965	1.6762e-09	4.56217e-09	10.4338
ITGA11	1.49801	1.72309	6.15792	1.69309e-09	4.6057e-09	10.4241
WDR72	2.39007	5.82096	6.1514	1.75836e-09	4.77817e-09	10.3871
CYP39A1	1.06027	-1.69684	6.14675	1.80634e-09	4.90531e-09	10.3609
WNT5A	1.08363	6.83775	6.12563	2.04102e-09	5.52725e-09	10.2417
C20orf165	1.05342	-2.12291	6.12366	2.06442e-09	5.58768e-09	10.2306
CLLU1	1.12587	-5.64875	6.10303	2.32522e-09	6.27208e-09	10.1145
RASL10B	1.52451	0.489681	6.10174	2.34259e-09	6.31809e-09	10.1072
DNASE1	1.00422	-0.200035	6.09422	2.44619e-09	6.59231e-09	10.065
FGB	1.95002	-6.66353	6.09272	2.46738e-09	6.64507e-09	10.0566
PRKCG	1.96051	-5.05589	6.08711	2.54824e-09	6.85565e-09	10.0252
PACSIN3	1.21927	-0.132877	6.07795	2.68601e-09	7.21589e-09	9.9738
EDAR	1.98407	0.145965	6.07682	2.7034e-09	7.25976e-09	9.9675
ERP27	1.81062	1.6654	6.02624	3.61056e-09	9.60042e-09	9.68535
KRT83	1.2526	-2.48558	6.01821	3.7798e-09	1.00374e-08	9.64069
SLC6A14	2.39931	-0.685887	6.01735	3.7982e-09	1.00837e-08	9.63595
THBS2	1.86738	-0.940025	6.01392	3.87314e-09	1.02773e-08	9.61691
SERPINF2	1.15595	0.585793	6.01169	3.92262e-09	1.04019e-08	9.60453
TPRXL	1.73904	-6.59768	6.00822	4.00096e-09	1.06055e-08	9.58526
SGIP1	1.04497	-4.74978	5.99661	4.27382e-09	1.13127e-08	9.52095
TNNT1	2.35014	2.44136	5.99236	4.37827e-09	1.15817e-08	9.49741
F2	1.46844	-5.27951	5.97969	4.70437e-09	1.24076e-08	9.4274
SSTR5	1.74012	-0.0901399	5.97698	4.77715e-09	1.25882e-08	9.41244
SLC4A8	1.10096	2.30838	5.97456	4.84318e-09	1.27525e-08	9.39906
CXCL17	1.97416	-2.5987	5.9694	4.98677e-09	1.31187e-08	9.37059
CCL26	1.37067	-2.81733	5.93394	6.09194e-09	1.59018e-08	9.17555
EVX1	1.94377	-1.34987	5.92519	6.39952e-09	1.66686e-08	9.12756
TNFSF11	1.3118	-2.76276	5.91741	6.68559e-09	1.73895e-08	9.08496
PPBP	2.53021	-1.80131	5.9119	6.8956e-09	1.79266e-08	9.05484
PAEP	1.37875	-7.19291	5.91062	6.94548e-09	1.80517e-08	9.04782
SLC26A9	1.89056	1.08537	5.90279	7.25737e-09	1.88266e-08	9.00503
CYP24A1	1.80721	-5.79569	5.90235	7.27558e-09	1.88691e-08	9.00259
IGFL1	1.62935	-6.43048	5.89641	7.52177e-09	1.94953e-08	8.97018
GRP	1.79138	-2.18211	5.89589	7.54384e-09	1.955e-08	8.96733
RDH12	1.02304	1.6333	5.88199	8.15403e-09	2.10701e-08	8.89159
DLX6AS	1.63146	-6.76506	5.87924	8.28054e-09	2.1389e-08	8.87659
FOXD4	1.00489	2.19009	5.86762	8.83568e-09	2.27714e-08	8.81341
FADS1	1.1579	1.17609	5.85165	9.65844e-09	2.48356e-08	8.72673
LAPTM4B	1.00412	3.23769	5.84705	9.90938e-09	2.54586e-08	8.70176
SYT12	1.30734	2.14132	5.84652	9.93849e-09	2.55238e-08	8.6989
RCOR2	1.11703	1.9058	5.84485	1.00313e-08	2.5759e-08	8.68985
LOC399815	1.12486	-5.67289	5.8127	1.19918e-08	3.06172e-08	8.5161
CDH11	1.1656	-0.785219	5.8101	1.21656e-08	3.10299e-08	8.5021
FAM157A	1.0864	-4.1948	5.7896	1.36259e-08	3.46042e-08	8.39179
FLJ22536	1.05323	-6.50477	5.77324	1.49129e-08	3.77429e-08	8.30399
SEC14L4	1.57775	-4.63149	5.76888	1.5275e-08	3.86106e-08	8.28065
BIRC7	1.36992	-4.03405	5.75966	1.60705e-08	4.05216e-08	8.23126
MAT1A	1.82788	1.9402	5.7551	1.64784e-08	4.15246e-08	8.20688
F2RL2	1.31279	-1.49381	5.74177	1.77294e-08	4.45732e-08	8.13571
PRDM13	1.46675	-4.35699	5.73949	1.79524e-08	4.50952e-08	8.12355
LST-3TM12	1.28892	-4.7264	5.71216	2.0849e-08	5.21796e-08	7.9781
LOC100134868	1.01089	-4.40132	5.71047	2.10431e-08	5.26333e-08	7.96909
SAA4	1.34873	-0.680014	5.70921	2.11879e-08	5.2989e-08	7.96242
CYP2W1	2.46284	2.10211	5.67493	2.55382e-08	6.34591e-08	7.78088
REG1A	3.77512	-1.86742	5.66944	2.63109e-08	6.53238e-08	7.75191
SFRP4	2.18909	5.37623	5.65693	2.81578e-08	6.97996e-08	7.68598
GIF	1.88478	-5.20581	5.63952	3.09417e-08	7.65065e-08	7.59437
BEAN	1.26117	-6.00716	5.62478	3.35055e-08	8.26169e-08	7.51703
CALCA	1.74649	-6.82485	5.62329	3.37746e-08	8.32505e-08	7.50926
PLA2G16	1.0045	3.72811	5.61983	3.44109e-08	8.47374e-08	7.49113
COL1A2	1.26019	4.2704	5.61394	3.55224e-08	8.74324e-08	7.46025
PLAC1	1.29571	-5.64081	5.61223	3.5851e-08	8.82095e-08	7.4513
HS6ST2	2.07555	-0.190403	5.59686	3.89407e-08	9.56283e-08	7.371
GUCY1B2	1.19465	-5.60229	5.59471	3.93936e-08	9.67289e-08	7.35977
GJB5	2.20322	-3.39555	5.59464	3.94077e-08	9.67521e-08	7.35943
IL1RN	1.34806	0.0843754	5.59098	4.01902e-08	9.85552e-08	7.34033
HTRA4	1.03782	-5.17845	5.5888	4.06619e-08	9.96405e-08	7.329
PLA2G3	2.19591	0.193294	5.58598	4.12824e-08	1.01077e-07	7.31429
CXCL6	1.58238	-0.723421	5.57137	4.46461e-08	1.08949e-07	7.23823
TRPM2	1.17096	7.01887	5.56251	4.68134e-08	1.14075e-07	7.1922
ATAD3C	1.2752	4.13937	5.55566	4.85576e-08	1.18143e-07	7.15669
NMU	1.89057	-1.30894	5.5478	5.06394e-08	1.23077e-07	7.11594
DUSP27	3.41989	3.43042	5.54529	5.13204e-08	1.24673e-07	7.10297
GPR84	1.1297	3.11128	5.53534	5.41169e-08	1.31233e-07	7.05147
FAM19A5	1.06711	4.34846	5.53418	5.44507e-08	1.32013e-07	7.0455
VTCN1	1.39255	-4.71839	5.52269	5.78849e-08	1.40073e-07	6.98614
IL24	1.94352	0.70466	5.52228	5.80103e-08	1.40343e-07	6.98404
RHCG	1.68901	3.23634	5.51286	6.09876e-08	1.47338e-07	6.93547
C14orf105	1.40674	-4.95896	5.51155	6.14115e-08	1.48257e-07	6.92875
SPRR2D	1.71439	-5.33704	5.50043	6.51422e-08	1.5695e-07	6.87152
SPHK1	1.12809	-0.216333	5.48496	7.06999e-08	1.70001e-07	6.79209
C21orf29	1.58658	-5.25366	5.48177	7.19027e-08	1.72731e-07	6.77572
IGF2BP3	2.02888	-4.15112	5.4796	7.27317e-08	1.746e-07	6.7646
FOLR1	2.0321	-4.26265	5.47461	7.46747e-08	1.79055e-07	6.73903
TBX20	1.35011	-2.78063	5.47409	7.48792e-08	1.79504e-07	6.73637
AQP9	1.7484	-3.60927	5.47166	7.58454e-08	1.81777e-07	6.72394
VSIG8	1.20705	-4.81298	5.4625	7.95988e-08	1.9044e-07	6.67709
CCL20	1.25211	2.62318	5.45323	8.35768e-08	1.99701e-07	6.62979
POU4F1	1.31711	-1.06151	5.44349	8.79708e-08	2.09785e-07	6.5801
DLX6	1.81566	-6.70268	5.42964	9.46021e-08	2.25154e-07	6.50964
LY6D	1.6726	-1.177	5.42101	9.89787e-08	2.35053e-07	6.46579
CHST4	2.13384	-2.28423	5.41651	1.01335e-07	2.40482e-07	6.44298
IGFL2	1.80759	2.68942	5.41313	1.03147e-07	2.44668e-07	6.4258
ITGBL1	1.82223	0.14729	5.40025	1.10328e-07	2.6122e-07	6.36056
F7	1.66248	-0.0979383	5.38921	1.16864e-07	2.76344e-07	6.30478
REG3A	3.31618	-3.18369	5.35928	1.36542e-07	3.21653e-07	6.15399
EGR4	1.19368	-2.05622	5.35352	1.40678e-07	3.31054e-07	6.12508
ODAM	1.99485	-3.14862	5.3535	1.40696e-07	3.31059e-07	6.12495
LGALS7	1.00605	0.863745	5.33862	1.51965e-07	3.56798e-07	6.05032
FGF20	1.4865	-6.18468	5.33771	1.5268e-07	3.58396e-07	6.04577
SAA2	1.81349	2.16301	5.32715	1.6124e-07	3.77711e-07	5.99294
NR0B2	1.52593	-1.43537	5.30751	1.78416e-07	4.16662e-07	5.89492
KIF12	1.05758	7.48055	5.30283	1.82767e-07	4.26338e-07	5.87159
SIX2	1.58136	-6.14886	5.30078	1.84698e-07	4.30599e-07	5.86142
LYPD3	1.0727	-3.82135	5.28407	2.01248e-07	4.67696e-07	5.77834
NPC1L1	1.90154	-4.33443	5.28277	2.02591e-07	4.70711e-07	5.7719
CELP	2.20229	-1.59558	5.28077	2.04683e-07	4.75464e-07	5.76196
SLCO1B1	1.03437	0.798229	5.26245	2.24809e-07	5.20566e-07	5.67118
SPRR1A	1.68561	-6.41422	5.25346	2.35365e-07	5.44394e-07	5.62678
GPR81	1.69028	2.50471	5.24831	2.41636e-07	5.58083e-07	5.60133
LCN2	1.60427	3.66131	5.24031	2.51687e-07	5.80187e-07	5.5619
NEUROG2	1.48503	-7.04597	5.22392	2.73577e-07	6.29444e-07	5.48123
KCNJ15	1.27766	-5.08096	5.21938	2.79951e-07	6.43534e-07	5.45895
VGF	1.34709	1.28642	5.21761	2.82482e-07	6.49278e-07	5.45024
DMRTA2	1.86948	0.020345	5.21514	2.86046e-07	6.56956e-07	5.43812
SPRR2A	1.63929	-6.17546	5.20975	2.93968e-07	6.7432e-07	5.41169
SERPINB7	1.4649	-7.74082	5.20649	2.98865e-07	6.84865e-07	5.39572
AADAC	1.36567	-6.65207	5.17507	3.50299e-07	7.9907e-07	5.24218
WISP3	2.02809	-5.88798	5.17416	3.51909e-07	8.02566e-07	5.23774
IRX3	1.3934	-5.61213	5.16915	3.60902e-07	8.22252e-07	5.21335
C3orf67	1.35873	0.214651	5.166	3.66668e-07	8.34927e-07	5.19803
SPRR1B	1.61348	-4.71338	5.14908	3.99233e-07	9.07268e-07	5.11578
GOLGA8B	1.20005	-1.70379	5.13728	4.23565e-07	9.60754e-07	5.05861
CSMD2	1.15341	-0.900488	5.13595	4.26396e-07	9.66749e-07	5.05218
SERPIND1	1.68675	0.585056	5.13153	4.35956e-07	9.87988e-07	5.03075
BEST3	1.22895	-1.50198	5.12971	4.39931e-07	9.96556e-07	5.02198
IL17A	1.21319	-2.00619	5.12866	4.42259e-07	1.00161e-06	5.01688
ISM2	1.79024	-1.36471	5.1194	4.63227e-07	1.04805e-06	4.97213
AKAP4	1.04305	-8.06766	5.11029	4.84784e-07	1.09441e-06	4.92819
FLJ45445	1.16438	3.17684	5.09725	5.17332e-07	1.16533e-06	4.86543
VCAN	1.08958	1.27454	5.08318	5.54834e-07	1.24721e-06	4.79784
CSF3	1.54994	-4.29615	5.07883	5.66939e-07	1.27288e-06	4.777
PADI1	1.2953	-6.43791	5.07369	5.81581e-07	1.3049e-06	4.75238
NCRNA00176	1.05559	-2.88982	5.062	6.16274e-07	1.37973e-06	4.69644
GOLGA6L6	1.10058	-5.0621	5.05425	6.40367e-07	1.43195e-06	4.65942
PHGDH	1.12567	1.65617	5.04554	6.68538e-07	1.49202e-06	4.61787
VENTX	1.58554	-1.9313	5.03163	7.16006e-07	1.59397e-06	4.55167
MYCN	1.14858	-6.34442	5.00195	8.28421e-07	1.83607e-06	4.41097
VGLL1	1.2049	-7.14229	4.99919	8.39707e-07	1.86008e-06	4.39792
MS4A15	1.29603	-4.45063	4.98122	9.16879e-07	2.02512e-06	4.31312
EREG	1.91124	0.235947	4.97758	9.33327e-07	2.06057e-06	4.29598
C17orf77	1.91538	-5.41572	4.97747	9.33837e-07	2.06147e-06	4.29545
BAMBI	1.14917	2.53013	4.96118	1.01106e-06	2.22716e-06	4.21884
LOC221442	1.01682	3.08012	4.95407	1.04664e-06	2.30257e-06	4.1855
EPHX3	1.005	-3.92392	4.93103	1.17052e-06	2.563e-06	4.07769
PRSS1	1.94544	1.63041	4.92806	1.18744e-06	2.59886e-06	4.06385
UPK2	1.12659	0.757799	4.91273	1.27881e-06	2.79209e-06	3.99243
IL17C	1.01828	-0.590157	4.90758	1.31102e-06	2.85968e-06	3.96846
FLJ16779	1.215	-5.19444	4.90475	1.32904e-06	2.89744e-06	3.95532
ORM2	1.10418	-7.36906	4.89904	1.36617e-06	2.97523e-06	3.92877
HOXC11	1.80131	1.09688	4.88996	1.42722e-06	3.10422e-06	3.88667
FOXD1	1.7717	-5.52398	4.87091	1.56397e-06	3.3934e-06	3.79855
CYP4X1	1.5479	2.57682	4.84646	1.75819e-06	3.79913e-06	3.68587
SLC28A3	1.62309	-3.75939	4.82787	1.92114e-06	4.13993e-06	3.60056
IFI6	1.02975	4.923	4.80614	2.13013e-06	4.57205e-06	3.50121
ADAMTS2	1.2767	-2.98273	4.80035	2.18942e-06	4.69293e-06	3.47481
FXYD4	1.02061	-5.70671	4.79331	2.26369e-06	4.84505e-06	3.44272
CXCL10	1.36557	-1.25412	4.77567	2.46052e-06	5.25373e-06	3.36255
MSLN	1.71927	5.05645	4.7752	2.46591e-06	5.26467e-06	3.36045
MYBPHL	1.21972	0.681208	4.76534	2.5833e-06	5.50844e-06	3.31573
SBK1	1.15106	-3.9739	4.74976	2.77969e-06	5.90634e-06	3.2453
ROBO2	1.31603	-3.72575	4.72779	3.0813e-06	6.5263e-06	3.14631
AMBP	1.29557	-6.47063	4.70712	3.39367e-06	7.16276e-06	3.05355
RNF182	1.49235	1.37364	4.70648	3.40375e-06	7.1818e-06	3.05071
UPK1A	1.0343	-9.88938	4.67914	3.86527e-06	8.12387e-06	2.9286
MYH4	1.05584	-0.558435	4.64728	4.47922e-06	9.37776e-06	2.78711
KLK11	1.62687	-3.13323	4.63416	4.75833e-06	9.93779e-06	2.72912
APCDD1	1.27156	7.4522	4.62569	4.94744e-06	1.03191e-05	2.69173
TNFRSF11B	1.10232	0.111645	4.6252	4.95857e-06	1.03413e-05	2.68958
C11orf41	1.48646	1.41711	4.61663	5.15765e-06	1.07404e-05	2.65182
CADPS	1.38173	6.07716	4.6113	5.2853e-06	1.09948e-05	2.62837
HECW1	1.03889	2.17669	4.60898	5.34186e-06	1.11023e-05	2.61817
KIAA1984	1.04421	1.4933	4.59564	5.67804e-06	1.17795e-05	2.55965
CCL24	1.18271	-1.08628	4.59247	5.76086e-06	1.19436e-05	2.54576
NBPF16	1.0231	0.340944	4.58178	6.04889e-06	1.25185e-05	2.499
MMP12	1.24763	0.551343	4.56143	6.63587e-06	1.36919e-05	2.41024
DLL3	1.04598	-7.64386	4.53705	7.41129e-06	1.52367e-05	2.30437
LOC400696	1.07762	0.951492	4.53357	7.52878e-06	1.54752e-05	2.28931
HULC	2.28892	-2.79539	4.53145	7.60114e-06	1.56161e-05	2.28015
SPACA3	1.28081	-5.60536	4.5091	8.40709e-06	1.71961e-05	2.18365
PADI3	1.59983	-4.94367	4.50468	8.57615e-06	1.75315e-05	2.16459
FAM3B	1.96184	-0.586141	4.5042	8.59441e-06	1.7567e-05	2.16256
MGC45800	1.05321	-6.63269	4.50303	8.64003e-06	1.76585e-05	2.15749
NODAL	1.01885	1.52874	4.46324	1.0325e-05	2.09624e-05	1.98702
C2CD4B	1.10971	-3.35793	4.42747	1.21052e-05	2.44533e-05	1.83492
REG1B	2.66075	0.779157	4.40244	1.35218e-05	2.72239e-05	1.72916
COL8A1	1.27778	2.02847	4.37848	1.50254e-05	3.01418e-05	1.62844
SOX1	1.75653	0.526956	4.36277	1.60967e-05	3.22155e-05	1.56267
AQP5	1.65854	-6.6674	4.34809	1.71639e-05	3.42944e-05	1.5014
TCAM1P	1.00462	-6.55582	4.34617	1.73081e-05	3.45757e-05	1.49342
C19orf41	1.09969	-3.5345	4.34257	1.75825e-05	3.51103e-05	1.4784
NPSR1	2.01472	-4.63897	4.33918	1.78443e-05	3.56088e-05	1.4643
SPRR3	1.3248	-5.56963	4.32278	1.91641e-05	3.81571e-05	1.39622
GPR143	1.46379	0.999816	4.31473	1.98454e-05	3.94831e-05	1.3629
TRY6	1.64606	-9.23935	4.30477	2.07209e-05	4.1181e-05	1.32172
CYP26A1	1.00793	-3.17959	4.29979	2.11719e-05	4.20245e-05	1.30119
TDO2	1.11513	-0.283895	4.29288	2.18145e-05	4.32539e-05	1.27268
CST6	1.05748	-6.05082	4.19952	3.25307e-05	6.34541e-05	0.892065
NPW	1.11458	-4.69147	4.18852	3.40834e-05	6.63316e-05	0.847703
GPR109B	1.30226	-4.04323	4.18595	3.4456e-05	6.69806e-05	0.837359
GRPR	1.15469	-3.01443	4.18546	3.45276e-05	6.71006e-05	0.835386
TMED7-TICAM2	1.07647	-2.03137	4.17921	3.54512e-05	6.8837e-05	0.810274
ZDHHC8P1	1.11008	3.65139	4.15182	3.97877e-05	7.69298e-05	0.700548
ORM1	1.33054	1.20194	4.12727	4.40985e-05	8.4905e-05	0.602792
DLX5	1.07348	-6.59351	4.09482	5.04831e-05	9.68101e-05	0.474382
SMTNL2	1.11049	-6.43302	4.08709	5.21306e-05	9.98079e-05	0.443898
MMP9	1.0692	2.57957	4.06894	5.61976e-05	0.000107344	0.372608
KLRG2	1.12273	-3.11883	4.06171	5.78993e-05	0.00011043	0.344308
LBP	1.05674	-3.82691	4.00479	7.31243e-05	0.000138236	0.122997
CPN1	1.22115	-6.3683	3.97117	8.38268e-05	0.0001578	-0.00634843
TBX4	1.05846	1.20494	3.96224	8.691e-05	0.000163409	-0.0405341
CALML3	1.07149	-4.65479	3.94435	9.34131e-05	0.000175133	-0.108806
LOC100133545	1.24442	-5.05018	3.94403	9.35343e-05	0.000175334	-0.110032
SERPINB2	1.17321	-5.49274	3.86317	0.000129162	0.000238548	-0.415003
LOC84740	1.52046	1.73347	3.85473	0.000133547	0.000246269	-0.44651
SLC38A3	1.17312	-4.4644	3.85143	0.000135296	0.000249249	-0.458791
ABCA12	1.42376	-3.22858	3.84848	0.000136881	0.000252077	-0.469776
SERPINA7	1.18824	1.84746	3.7561	0.000196349	0.000356951	-0.809771
LGR6	1.13043	-1.99177	3.751	0.000200256	0.000363731	-0.828313
EPHB1	1.08086	3.78602	3.74263	0.000206825	0.000375139	-0.858682
C5orf38	1.25169	1.3623	3.72605	0.000220452	0.000398616	-0.918697
SLC38A5	1.09387	-1.94015	3.72316	0.000222911	0.000402742	-0.929125
IGF2BP1	1.52608	0.237848	3.72265	0.000223345	0.000403456	-0.930957
TRIM72	1.18204	-3.83218	3.71668	0.000228516	0.000412326	-0.952477
HOTAIR	1.07569	-6.68008	3.70452	0.000239409	0.000431185	-0.996246
KLK12	1.37587	-4.05529	3.65055	0.000293887	0.000525154	-1.18876
TCP11	1.02263	-1.37583	3.62195	0.000327278	0.000581935	-1.28968
MAGEA3	1.63027	0.706219	3.61424	0.000336879	0.000598332	-1.31678
MUC6	1.50798	-3.65463	3.60658	0.000346675	0.000614934	-1.34364
MAGEA6	1.69798	-1.87307	3.53485	0.000452278	0.000793748	-1.59249
TNNC1	1.02122	1.33793	3.52966	0.000460997	0.000808013	-1.61033
FAM83A	1.03821	2.49698	3.47477	0.000563213	0.000979066	-1.79732
WNT11	1.11505	-4.56636	3.41862	0.000689391	0.00118805	-1.98571
CACNG4	1.35631	-4.84826	3.40632	0.000720352	0.00123922	-2.0266
MAGEA11	1.25001	-6.07024	3.39031	0.000762604	0.00130905	-2.07963
NXF2	1.18106	-7.66508	3.34904	0.000882361	0.00150543	-2.21517
B4GALNT4	1.28083	0.375186	3.31113	0.00100757	0.001707	-2.3383
NKX2-1	1.00129	-3.30383	3.25565	0.00122081	0.00204782	-2.5161
GRM8	1.13626	-2.1643	3.25136	0.00123891	0.00207649	-2.52972
DLX3	1.13742	0.107068	3.24071	0.00128499	0.00215161	-2.56349
DRD2	1.16242	2.44891	3.21056	0.00142412	0.00237469	-2.65847
DKK1	1.07038	-6.01162	3.16319	0.00167114	0.00276749	-2.80602
SAA1	1.13104	1.45294	3.15889	0.00169543	0.00280591	-2.81932
MAGEA2	1.19874	-6.89741	3.15537	0.00171554	0.00283621	-2.83018
GABRP	1.19305	-1.72333	3.04836	0.00244291	0.0039678	-3.155
MAGEA12	1.06729	-3.41565	3.02238	0.00265785	0.00430192	-3.23225
GNG4	1.20105	-2.34809	2.99106	0.00293989	0.00473528	-3.32451
DEFA6	1.54949	3.13454	2.95756	0.00327176	0.00524308	-3.42219
CKMT2	1.32271	-1.91552	2.85338	0.00453452	0.00714675	-3.7192
DUOXA2	1.29228	-1.09318	2.84231	0.00469202	0.00738026	-3.75017
PRAME	1.05606	1.86342	2.71305	0.00693444	0.0106928	-4.10305
CLDN18	1.20569	-6.28029	2.5774	0.0102867	0.0155387	-4.45629
TSIX	1.0411	0.37882	2.15407	0.0317896	0.0451498	-5.4453

## Sheet: 3218 down-regulated genes
gene	logFC	AveExpr	t	P.Value	adj.P.Val	B
OTOP2	-9.36776	-4.18708	-44.3297	1.83737e-162	1.88606e-158	360.586
AADACL2	-2.71507	-0.292657	-41.2691	1.22124e-151	8.35735e-148	335.857
DHRS7C	-2.84147	-7.46657	-39.0511	1.71886e-143	7.05764e-140	317.222
OTOP3	-4.49261	0.540005	-38.7439	2.42377e-142	8.29334e-139	314.593
LGI1	-4.63561	-5.51163	-34.2939	4.03778e-125	9.21062e-122	275.168
DAO	-4.92314	0.324108	-32.8612	2.39608e-119	4.91916e-116	261.942
SLC17A8	-4.33533	-7.89994	-32.1629	1.71165e-116	3.19456e-113	255.403
UGP2	-1.99841	0.378789	-31.8347	3.8353e-115	6.56156e-112	252.308
BEST4	-6.84513	-5.82027	-31.7685	7.19224e-115	1.13582e-111	251.682
KRT24	-5.34936	-6.75001	-31.5312	6.87684e-114	1.00844e-110	249.435
VSTM2A	-5.46209	-7.61794	-31.3105	5.64791e-113	7.7301e-110	247.339
FAM180B	-3.37255	-7.26551	-30.8012	7.45259e-111	9.5626e-108	242.479
TMEFF2	-3.49523	-2.44835	-30.5172	1.14996e-109	1.38874e-106	239.754
KHDRBS2	-2.43105	0.0164317	-29.7042	3.05289e-106	3.48199e-103	231.905
CMTM5	-3.50979	-8.7757	-29.1469	7.08785e-104	6.92921e-101	226.48
CA7	-7.68641	-1.61119	-29.0513	1.81171e-103	1.69065e-100	225.546
GRIK1	-2.66867	-4.94314	-28.9072	7.46486e-103	6.6632e-100	224.136
CHAT	-2.35856	-7.13325	-28.9019	7.86482e-103	6.7277e-100	224.084
RXRG	-4.10928	-3.41647	-28.8	2.14323e-102	1.76002e-99	223.085
PCSK2	-5.56894	-2.57724	-28.7595	3.19193e-102	2.5204e-99	222.689
FAM135B	-4.65071	-5.72569	-28.6917	6.22585e-102	4.58873e-99	222.023
ELANE	-2.88856	-5.23906	-28.1187	1.79823e-99	1.1909e-96	216.381
GLP2R	-4.64541	-6.67566	-28.031	4.29174e-99	2.75342e-96	215.514
P2RX2	-3.30978	-9.02095	-27.8942	1.67154e-98	1.00932e-95	214.16
RERGL	-5.25274	1.08312	-27.4763	1.07406e-96	6.30014e-94	210.014
SGCG	-3.3066	-6.37653	-27.367	3.20111e-96	1.82552e-93	208.926
GUCA2B	-8.58973	-3.686	-27.3455	3.9688e-96	2.20215e-93	208.712
CLEC3B	-4.32543	-0.368746	-26.7954	9.85594e-94	5.3248e-91	203.219
GLTP	-1.55906	6.61766	-26.7845	1.09941e-93	5.78738e-91	203.11
SLC25A34	-4.31255	-4.03044	-26.746	1.61877e-93	8.30833e-91	202.725
MUSK	-3.70003	-6.65025	-26.6792	3.17031e-93	1.58747e-90	202.055
PMP2	-3.8905	-8.39719	-26.2647	2.06911e-91	9.87882e-89	197.892
MMP27	-1.90375	-2.83224	-25.8248	1.77497e-89	7.92178e-87	193.457
FEV	-4.58792	-8.25437	-25.7187	5.20276e-89	2.27261e-86	192.386
CDH10	-2.18203	-7.8434	-25.6432	1.12047e-88	4.69453e-86	191.622
STMN4	-3.46143	-4.96229	-25.556	2.71672e-88	1.11548e-85	190.739
NPY2R	-4.02724	-8.03371	-25.4431	8.56167e-88	3.38021e-85	189.596
FIGF	-4.47156	-2.62637	-25.4263	1.01561e-87	3.93406e-85	189.426
PYY	-8.63435	-6.41491	-25.1983	1.03416e-86	3.7248e-84	187.114
XKR4	-3.12219	-9.56257	-25.056	4.41423e-86	1.536e-83	185.668
ADH1A	-4.28359	-3.82819	-24.9507	1.29357e-85	4.35361e-83	184.597
SULT1A2	-4.27079	-1.53012	-24.9096	1.96677e-85	6.51253e-83	184.179
FAM151A	-4.25772	-5.81263	-24.6788	2.08161e-84	6.6774e-82	181.828
GSG1L	-2.39273	-2.07192	-24.5632	6.79722e-84	2.11435e-81	180.649
TMIGD1	-8.8308	-5.10137	-24.3161	8.54892e-83	2.61954e-80	178.127
SST	-6.21055	-2.55191	-24.2691	1.38453e-82	4.18006e-80	177.646
SLC30A10	-6.28578	1.74286	-24.1299	5.77671e-82	1.71878e-79	176.223
CNGB1	-2.75387	-4.20659	-24.1037	7.56361e-82	2.2183e-79	175.954
MYOT	-4.24779	-6.34928	-24.0462	1.36437e-81	3.89036e-79	175.367
NGB	-3.79611	-4.22971	-23.9971	2.26008e-81	6.35608e-79	174.864
ENPP6	-3.6487	-0.708906	-23.9931	2.35455e-81	6.53228e-79	174.823
SCGN	-6.18676	-5.82074	-23.9491	3.70108e-81	1.01311e-78	174.372
KIAA1737	-1.29365	-0.550735	-23.9216	4.91171e-81	1.32681e-78	174.09
AVPR1B	-1.71136	-6.39635	-23.7777	2.15721e-80	5.6779e-78	172.616
ASPA	-4.03779	-8.96899	-23.7626	2.52212e-80	6.55431e-78	172.46
TAT	-3.39335	-9.89408	-23.6184	1.11277e-79	2.82039e-77	170.981
ZNF575	-2.17989	-2.87424	-23.4936	4.02339e-79	9.95184e-77	169.7
PRKG2	-4.27238	-2.33526	-23.4698	5.14144e-79	1.25659e-76	169.456
ANGPTL7	-4.75971	-5.76647	-23.4586	5.77144e-79	1.39397e-76	169.341
ETFDH	-1.88257	-3.11261	-23.4556	5.95499e-79	1.42158e-76	169.31
TMEM72	-5.04651	-2.68541	-23.3333	2.10147e-78	4.95898e-76	168.053
TEX11	-3.96738	-5.65383	-23.3295	2.18482e-78	5.0971e-76	168.015
CADM2	-3.84069	-5.55864	-23.1971	8.57336e-78	1.95568e-75	166.652
MAS1L	-1.59424	-7.05265	-23.1735	1.09286e-77	2.46554e-75	166.41
CDKN2BAS	-6.57108	-3.30583	-23.1716	1.11478e-77	2.48765e-75	166.391
C2orf88	-4.22465	-0.825591	-23.1437	1.48739e-77	3.28346e-75	166.103
SYT10	-2.53077	0.563962	-23.0566	3.65558e-77	7.98393e-75	165.207
SPHKAP	-2.06789	-7.51769	-23.0519	3.83809e-77	8.29431e-75	165.159
PEX26	-1.89017	3.40318	-23.0369	4.48193e-77	9.5848e-75	165.004
ARPP21	-2.02113	-7.51147	-23.0279	4.91755e-77	1.0408e-74	164.912
PLP1	-6.56913	1.78112	-22.9041	1.76775e-76	3.67554e-74	163.637
PLCD1	-2.33777	5.95393	-22.9038	1.77242e-76	3.67554e-74	163.634
PHLPP2	-2.39121	-0.029124	-22.8788	2.29634e-76	4.71439e-74	163.376
MS4A10	-3.69516	-0.0121573	-22.8048	4.93602e-76	1.00333e-73	162.614
CMA1	-4.39368	-5.60173	-22.8012	5.12361e-76	1.03125e-73	162.577
HIGD1A	-1.8425	6.00195	-22.7829	6.19001e-76	1.2338e-73	162.388
ABCB11	-4.20386	0.461106	-22.6908	1.60487e-75	3.05074e-73	161.439
AMPD1	-4.74254	-5.2456	-22.6225	3.25368e-75	6.12825e-73	160.735
ABCG2	-5.21739	-3.89424	-22.6142	3.54607e-75	6.61826e-73	160.649
CTNND2	-3.76065	0.485014	-22.6088	3.74791e-75	6.93194e-73	160.594
APPL2	-1.70655	3.5289	-22.6021	4.0181e-75	7.36532e-73	160.524
HPSE2	-3.6825	-6.04714	-22.5388	7.74001e-75	1.40622e-72	159.871
GCG	-7.69492	1.95861	-22.4906	1.27414e-74	2.29457e-72	159.374
PHOX2B	-4.30069	-6.0015	-22.3713	4.38532e-74	7.62971e-72	158.143
RETSAT	-1.84294	2.20329	-22.3239	7.1638e-74	1.21548e-71	157.654
CLDN23	-3.26868	1.71076	-22.251	1.52499e-73	2.56623e-71	156.901
SPPL2A	-1.78637	2.14111	-22.2463	1.6005e-73	2.67141e-71	156.853
SLC30A8	-2.11664	-5.82888	-22.2291	1.91319e-73	3.16756e-71	156.675
SH2D7	-4.12079	-3.93529	-22.0923	7.90019e-73	1.26712e-70	155.262
MIER3	-1.79359	3.45513	-22.06	1.1047e-72	1.75809e-70	154.928
GCNT2	-4.24346	-3.73349	-21.9635	3.00507e-72	4.74569e-70	153.931
PDCD4	-1.8854	2.69636	-21.951	3.41999e-72	5.35972e-70	153.802
MYOC	-5.62912	-3.46058	-21.9478	3.53514e-72	5.49821e-70	153.769
GPR119	-1.53798	-6.75694	-21.9104	5.2119e-72	7.98509e-70	153.382
ACADS	-2.43224	0.380307	-21.8272	1.2358e-71	1.86551e-69	152.522
ANGPTL5	-2.0784	-7.31235	-21.6777	5.83137e-71	8.67522e-69	150.976
LRRC7	-2.90609	-6.76085	-21.6583	7.13306e-71	1.04601e-68	150.775
KCNIP4	-2.36938	-2.08242	-21.5899	1.45137e-70	2.11323e-68	150.067
CASR	-2.549	0.236885	-21.5696	1.79085e-70	2.58917e-68	149.858
ST8SIA3	-2.92814	-8.11179	-21.5417	2.39305e-70	3.43562e-68	149.569
FUCA1	-1.84639	0.646207	-21.4958	3.85396e-70	5.49457e-68	149.094
NRXN1	-5.35594	-6.32989	-21.4648	5.31954e-70	7.53174e-68	148.773
CA2	-5.96117	2.86359	-21.3266	2.23403e-69	3.09896e-67	147.343
MAGEE2	-2.00376	-7.7079	-21.3175	2.45648e-69	3.38466e-67	147.248
SMPDL3A	-2.81673	5.94444	-21.2376	5.63217e-69	7.60713e-67	146.421
SLC22A5	-1.8478	-0.180753	-21.2337	5.863e-69	7.86715e-67	146.381
RSPO2	-4.95196	0.234577	-21.2188	6.84469e-69	9.00779e-67	146.227
LOC572558	-3.9379	0.843828	-21.217	6.97385e-69	9.11931e-67	146.209
DHRS11	-2.80515	6.67579	-21.2139	7.20079e-69	9.35647e-67	146.177
PKIB	-4.72456	2.02207	-21.2001	8.31124e-69	1.07314e-66	146.034
USP2	-4.21962	1.50696	-21.156	1.31396e-68	1.6755e-66	145.577
HMGCLL1	-2.6001	0.336727	-21.1323	1.68209e-68	2.13168e-66	145.331
GFRA2	-4.2683	0.653226	-21.0452	4.15551e-68	5.20199e-66	144.43
SPIB	-5.62044	3.94567	-21.0164	5.60464e-68	6.97353e-66	144.132
GALR1	-1.84212	-7.12765	-20.9017	1.84563e-67	2.25541e-65	142.944
KCTD4	-2.97167	-3.22212	-20.8252	4.09093e-67	4.91151e-65	142.151
MGAT4C	-1.88839	-7.75466	-20.7368	1.02453e-66	1.21581e-64	141.237
SLC17A7	-3.19376	1.48928	-20.7039	1.44217e-66	1.70159e-64	140.896
KIAA0408	-5.25109	-7.69653	-20.6428	2.72101e-66	3.19214e-64	140.263
ROPN1	-2.64783	-2.24115	-20.6262	3.23309e-66	3.77133e-64	140.091
ENDOD1	-1.71744	-1.29253	-20.6131	3.70497e-66	4.29734e-64	139.956
PHOX2A	-3.03181	-7.25178	-20.6103	3.81425e-66	4.39924e-64	139.927
CNTN2	-4.20025	-4.19587	-20.5873	4.84651e-66	5.52771e-64	139.688
CCL23	-3.99975	-4.50441	-20.5849	4.96859e-66	5.63564e-64	139.663
MAB21L1	-3.2274	-5.91933	-20.5549	6.78689e-66	7.61392e-64	139.353
CA1	-10.4787	3.28881	-20.5169	1.00662e-65	1.11708e-63	138.96
PKHD1L1	-4.09007	-7.86768	-20.5113	1.06794e-65	1.17875e-63	138.901
CNNM2	-1.66686	5.89679	-20.4996	1.20527e-65	1.32322e-63	138.78
PPAP2A	-2.07089	7.23812	-20.4636	1.75204e-65	1.90314e-63	138.408
HTR3E	-3.58738	-6.94746	-20.4225	2.68476e-65	2.90096e-63	137.982
BAI3	-3.63528	-7.70332	-20.3444	6.0482e-65	6.36767e-63	137.173
GNA11	-1.78674	7.14815	-20.3351	6.66271e-65	6.94342e-63	137.077
MOBP	-2.52411	-5.36561	-20.2404	1.78114e-64	1.80132e-62	136.097
LRRC3B	-1.98805	-9.45801	-20.2106	2.42768e-64	2.44315e-62	135.788
ADCYAP1R1	-2.43453	-7.81473	-20.1723	3.61499e-64	3.5853e-62	135.392
PRDX6	-1.36821	9.2602	-20.1613	4.05556e-64	4.00291e-62	135.277
CITED2	-1.89532	6.78574	-20.1458	4.76255e-64	4.67823e-62	135.117
GRAMD3	-1.53886	7.10503	-20.1426	4.92415e-64	4.81394e-62	135.084
GUCA2A	-7.03838	0.0452172	-20.1215	6.12807e-64	5.96252e-62	134.866
DMRTA1	-3.80177	-8.22643	-20.0808	9.35668e-64	9.06097e-62	134.444
MAL	-4.13336	-5.0203	-20.0496	1.29296e-63	1.24622e-61	134.122
MAMDC2	-5.84666	-1.11274	-20.0488	1.30473e-63	1.25168e-61	134.113
ELAVL3	-2.71368	-8.20389	-20.0434	1.38027e-63	1.318e-61	134.057
AQP8	-9.0973	-2.86126	-20.0426	1.39111e-63	1.3222e-61	134.049
MXI1	-1.58548	-1.93441	-20.0028	2.10448e-63	1.98188e-61	133.636
PABPC1L2B	-1.10614	-0.825897	-19.9813	2.62964e-63	2.45468e-61	133.414
LYVE1	-4.85565	3.80792	-19.9765	2.76352e-63	2.5672e-61	133.365
SLC25A23	-1.69249	3.51299	-19.9512	3.59648e-63	3.32594e-61	133.102
LOC284276	-1.98465	-6.54406	-19.9112	5.44575e-63	4.99113e-61	132.689
C2orf40	-4.83233	-1.75078	-19.8439	1.09602e-62	9.95636e-61	131.992
ASTN1	-3.55147	-1.60552	-19.8216	1.38163e-62	1.24955e-60	131.761
SLC6A19	-6.802	-5.27309	-19.7954	1.81334e-62	1.62567e-60	131.491
GNG3	-2.73393	-7.11787	-19.7189	4.01235e-62	3.56595e-60	130.699
DUSP21	-1.13839	-5.56802	-19.6908	5.36811e-62	4.75032e-60	130.409
BMP3	-6.55089	0.134414	-19.6401	9.09339e-62	7.97809e-60	129.884
CCNYL1	-1.35614	1.32209	-19.5941	1.46566e-61	1.26429e-59	129.408
ZBTB7B	-1.39079	4.79934	-19.5096	3.52152e-61	2.97445e-59	128.535
ABCA8	-6.30621	-5.64267	-19.5092	3.53515e-61	2.97445e-59	128.531
HS3ST6	-2.88844	-7.61386	-19.4908	4.2795e-61	3.57147e-59	128.341
CLEC9A	-2.89635	-0.192263	-19.455	6.20414e-61	5.15672e-59	127.971
GPR12	-1.66142	-7.2602	-19.4312	7.94099e-61	6.57373e-59	127.725
GBA3	-5.43911	-5.28588	-19.4048	1.04456e-60	8.57797e-59	127.452
NAAA	-2.21642	-1.92576	-19.3509	1.827e-60	1.48843e-58	126.895
MT1M	-5.83134	-0.699278	-19.3445	1.95254e-60	1.57817e-58	126.829
SYT9	-1.88383	-5.13045	-19.3281	2.31391e-60	1.86292e-58	126.659
DPP6	-4.742	-5.08818	-19.3244	2.4053e-60	1.92894e-58	126.621
NRG2	-2.75986	0.311369	-19.2915	3.38126e-60	2.69059e-58	126.281
TP53INP2	-2.62577	3.24098	-19.2866	3.55992e-60	2.82182e-58	126.23
TMEM100	-4.30203	-5.07213	-19.2475	5.33977e-60	4.16827e-58	125.826
SLC25A20	-1.65486	-1.34526	-19.2334	6.17634e-60	4.78491e-58	125.681
ZER1	-1.20419	4.35417	-19.2275	6.56505e-60	5.06693e-58	125.62
PIRT	-4.55751	1.72104	-19.2027	8.49058e-60	6.50416e-58	125.364
SCARA5	-6.1893	-0.0346199	-19.1985	8.86979e-60	6.74532e-58	125.321
CRHBP	-2.4406	0.896577	-19.1985	8.8711e-60	6.74532e-58	125.32
GABRG1	-1.2819	-2.78623	-19.1437	1.56478e-59	1.17244e-57	124.755
CLDN8	-7.49322	-3.43301	-19.1337	1.7363e-59	1.29623e-57	124.651
ADHFE1	-3.38077	-5.35002	-19.114	2.12916e-59	1.58375e-57	124.448
NCRNA00092	-2.62251	-6.27318	-19.0558	3.89259e-59	2.87464e-57	123.847
FOXD3	-3.08458	0.182398	-19.0534	3.99001e-59	2.93602e-57	123.822
PRIMA1	-5.53383	1.49478	-19.0446	4.3705e-59	3.20451e-57	123.732
KIAA2022	-3.81633	-7.26164	-19.0256	5.32462e-59	3.8902e-57	123.535
PLD5	-1.79297	-8.07372	-19.0111	6.18555e-59	4.48725e-57	123.386
PI16	-5.85254	2.49283	-18.9868	7.95677e-59	5.73167e-57	123.135
SPOCK3	-3.29799	-8.52149	-18.9684	9.62781e-59	6.86316e-57	122.945
SCN11A	-3.32433	-0.820299	-18.9352	1.35714e-58	9.60762e-57	122.603
OLFM3	-2.96939	-6.20892	-18.9153	1.66855e-58	1.17716e-56	122.397
SLC27A6	-2.9493	-4.47548	-18.8552	3.10825e-58	2.1779e-56	121.777
KRTAP13-2	-3.96559	-6.84092	-18.8389	3.67725e-58	2.56782e-56	121.61
SLC7A14	-3.91779	-5.85889	-18.8322	3.94294e-58	2.73475e-56	121.54
NAP1L2	-3.88861	-4.24156	-18.8227	4.35101e-58	3.00761e-56	121.442
IL6R	-3.16557	-1.9149	-18.808	5.0638e-58	3.48859e-56	121.291
RNF152	-3.08297	-5.68213	-18.789	6.16554e-58	4.21929e-56	121.095
UGDH	-1.79757	8.70799	-18.7805	6.73069e-58	4.59073e-56	121.008
FAM107A	-3.73231	-3.29929	-18.7796	6.79481e-58	4.61912e-56	120.998
TPH1	-4.03531	-0.817259	-18.7454	9.67685e-58	6.55662e-56	120.646
CADM3	-5.88921	-3.44557	-18.7445	9.77122e-58	6.59878e-56	120.636
SCN7A	-5.69504	2.01858	-18.7254	1.1905e-57	8.01342e-56	120.439
ELAVL4	-3.24557	0.996569	-18.7188	1.27463e-57	8.55171e-56	120.371
MT1F	-3.46249	-3.70297	-18.7179	1.28619e-57	8.60111e-56	120.362
HSD3B2	-5.24882	-4.24231	-18.709	1.41016e-57	9.33887e-56	120.271
MIER1	-1.24891	-0.471561	-18.7025	1.50892e-57	9.96078e-56	120.203
FAM5C	-5.5328	-2.18741	-18.6905	1.70796e-57	1.12386e-55	120.08
FRMPD4	-2.80326	0.445616	-18.6899	1.71904e-57	1.12754e-55	120.073
ETHE1	-1.92218	7.07424	-18.6854	1.80048e-57	1.17719e-55	120.027
ENTPD5	-2.60081	0.75022	-18.6442	2.75756e-57	1.78589e-55	119.603
DHDDS	-1.28066	0.540931	-18.6173	3.641e-57	2.34325e-55	119.326
TDP2	-1.89475	8.91428	-18.6161	3.68596e-57	2.36477e-55	119.314
FBLIM1	-1.23805	7.08921	-18.613	3.8047e-57	2.43335e-55	119.282
FAM82A1	-1.99606	4.90045	-18.5848	5.09386e-57	3.23768e-55	118.991
SLC16A12	-2.32258	-8.75168	-18.5507	7.2448e-57	4.56245e-55	118.64
SPINK2	-3.29098	-5.73202	-18.5272	9.23368e-57	5.77949e-55	118.399
HMP19	-4.56709	-5.2814	-18.5187	1.0088e-56	6.27599e-55	118.311
ALPI	-5.34668	-1.92607	-18.4431	2.20145e-56	1.34511e-54	117.533
PLAC9	-3.99752	0.64078	-18.4385	2.30898e-56	1.40663e-54	117.486
KLF4	-2.86728	3.95082	-18.4373	2.33864e-56	1.42048e-54	117.473
PXMP2	-1.73019	1.72459	-18.3985	3.48867e-56	2.11275e-54	117.074
CNTFR	-5.64377	-0.890282	-18.3963	3.56907e-56	2.15509e-54	117.052
STIM1	-1.08004	-0.368273	-18.3946	3.63192e-56	2.18661e-54	117.034
RASGEF1C	-2.84304	-2.81755	-18.3902	3.80364e-56	2.27664e-54	116.988
NCOA4	-1.07114	0.913051	-18.3817	4.14907e-56	2.46186e-54	116.902
SLC36A1	-1.80262	3.76315	-18.3572	5.34351e-56	3.14333e-54	116.65
CD177	-7.51577	-2.36073	-18.3445	6.09243e-56	3.57365e-54	116.519
CDKN2B	-3.30973	-2.45888	-18.3422	6.2411e-56	3.65042e-54	116.495
SOX10	-4.84018	-4.091	-18.3417	6.27193e-56	3.65803e-54	116.49
ERVFRDE1	-2.21166	-4.50771	-18.3399	6.38967e-56	3.71615e-54	116.472
SLC5A7	-3.45652	-8.01145	-18.3265	7.34034e-56	4.25698e-54	116.333
AHCYL2	-2.89615	6.76266	-18.3213	7.74337e-56	4.46549e-54	116.28
HPGDS	-3.69125	-5.6519	-18.2318	1.94958e-55	1.1149e-53	115.36
CD160	-2.41217	-5.97711	-18.2088	2.47077e-55	1.40902e-53	115.124
FGFBP2	-3.01235	-4.22482	-18.206	2.54407e-55	1.44681e-53	115.095
STBD1	-1.7623	3.72183	-18.1992	2.72754e-55	1.54686e-53	115.026
RALYL	-1.70726	0.00906572	-18.17	3.68667e-55	2.07932e-53	114.726
C16orf89	-4.73406	-3.71996	-18.1628	3.97121e-55	2.22756e-53	114.652
LIFR	-3.74159	3.04981	-18.1498	4.54116e-55	2.51973e-53	114.518
MPZ	-3.0703	1.34433	-18.1448	4.78114e-55	2.64574e-53	114.467
TEF	-1.76774	-2.11803	-18.1339	5.34822e-55	2.9358e-53	114.355
RAP1A	-1.1279	4.01155	-18.1208	6.1238e-55	3.35258e-53	114.22
C4orf34	-1.93411	5.26848	-18.1023	7.40543e-55	4.02205e-53	114.031
AP3S2	-1.06773	7.40011	-18.0819	9.13875e-55	4.95036e-53	113.821
CPT2	-1.36511	4.6898	-18.0811	9.21461e-55	4.97832e-53	113.813
PCDH11X	-1.98922	0.142496	-18.0761	9.70371e-55	5.2288e-53	113.762
SLC2A13	-1.81609	-1.70331	-18.0546	1.21133e-54	6.47619e-53	113.541
SEMA3E	-4.73213	-5.52837	-18.0195	1.73916e-54	9.22611e-53	113.18
METTL7A	-2.68453	1.03033	-18.0072	1.97347e-54	1.04421e-52	113.055
ATP6V0D1	-1.13565	0.925022	-18.0014	2.09558e-54	1.10597e-52	112.995
FXYD1	-4.55842	-3.69169	-17.9913	2.32424e-54	1.22038e-52	112.892
SCN9A	-4.24119	-4.1276	-17.9857	2.46306e-54	1.28996e-52	112.834
CHST9	-3.03425	-7.4248	-17.9575	3.2925e-54	1.71998e-52	112.545
SLC26A2	-4.7204	0.392677	-17.9444	3.76657e-54	1.95272e-52	112.411
ZNF536	-3.63416	0.0985416	-17.9372	4.05494e-54	2.09693e-52	112.337
CBLN2	-3.33715	-5.1726	-17.9226	4.71392e-54	2.41942e-52	112.187
GPD1L	-1.49886	-0.139125	-17.883	7.08196e-54	3.59883e-52	111.782
PDE6A	-4.51812	-5.67449	-17.8567	9.28826e-54	4.68521e-52	111.512
SLC4A10	-4.11268	-6.85075	-17.8537	9.57348e-54	4.80547e-52	111.482
NPY6R	-4.51935	-4.16067	-17.8406	1.09635e-53	5.48979e-52	111.346
LOC728606	-2.73716	-5.55745	-17.8179	1.38458e-53	6.88267e-52	111.114
CDH19	-4.40506	-4.96953	-17.8161	1.41047e-53	6.99444e-52	111.096
UNC5D	-2.55008	0.723489	-17.8153	1.42125e-53	7.03092e-52	111.088
C1orf177	-2.35291	-5.09313	-17.8098	1.5046e-53	7.40755e-52	111.031
MYT1L	-1.96215	-4.35781	-17.7848	1.94399e-53	9.54789e-52	110.776
CLEC4M	-1.9447	-6.6834	-17.7795	2.05278e-53	1.00582e-51	110.722
PINK1	-1.49901	8.10019	-17.7773	2.10062e-53	1.0268e-51	110.699
AGPAT9	-2.85406	-1.07051	-17.7768	2.11135e-53	1.0296e-51	110.694
TMEM220	-3.28669	-4.16386	-17.7757	2.13586e-53	1.03908e-51	110.682
ANKS1B	-2.91434	0.288259	-17.7705	2.25357e-53	1.09375e-51	110.629
BEX1	-3.5403	-2.63793	-17.7657	2.36746e-53	1.14632e-51	110.58
AQPEP	-2.85119	-4.7907	-17.7327	3.3237e-53	1.59802e-51	110.242
CHP	-1.44928	0.823888	-17.7303	3.40617e-53	1.63385e-51	110.217
NLGN1	-3.49053	-2.78719	-17.7116	4.12766e-53	1.96615e-51	110.026
GNA13	-1.02671	4.91537	-17.6974	4.77462e-53	2.25859e-51	109.881
GABRG2	-2.85399	-8.94335	-17.6969	4.79801e-53	2.25942e-51	109.876
MS4A12	-8.32719	1.45332	-17.6969	4.79838e-53	2.25942e-51	109.876
CDKL1	-2.15422	1.12864	-17.6404	8.56937e-53	4.0075e-51	109.298
MPND	-1.16576	-0.9404	-17.5951	1.36483e-52	6.33626e-51	108.835
CNR1	-4.45651	-7.32782	-17.5949	1.36725e-52	6.33626e-51	108.833
ZZEF1	-1.67278	5.95616	-17.5818	1.56387e-52	7.23113e-51	108.699
SLC4A4	-6.28733	1.01251	-17.5495	2.17971e-52	1.00335e-50	108.368
RILP	-1.85699	-3.62417	-17.5439	2.30739e-52	1.05738e-50	108.312
B3GALT1	-4.2788	-3.97323	-17.5164	3.06012e-52	1.3961e-50	108.031
ATCAY	-3.21912	0.852968	-17.5064	3.39059e-52	1.54343e-50	107.928
CPEB1	-3.36768	-6.43022	-17.4975	3.71482e-52	1.68728e-50	107.837
CASP7	-1.64735	8.8114	-17.4935	3.87134e-52	1.75063e-50	107.796
NR3C2	-3.09719	-1.61211	-17.4911	3.9661e-52	1.78954e-50	107.772
KCNE2	-2.21101	-5.15157	-17.4393	6.74387e-52	3.01637e-50	107.244
RDH5	-2.55802	4.9254	-17.4089	9.21342e-52	4.10307e-50	106.933
TMEM37	-3.20096	0.905194	-17.385	1.17716e-51	5.21967e-50	106.689
C14orf176	-3.01167	-2.12576	-17.3795	1.24474e-51	5.48381e-50	106.633
PDK4	-3.33478	-1.55159	-17.3703	1.36783e-51	6.01317e-50	106.539
CAV3	-1.25044	-0.998297	-17.3656	1.43481e-51	6.29417e-50	106.492
CA4	-8.35023	0.19714	-17.3604	1.51391e-51	6.61287e-50	106.438
GNG7	-3.0498	-4.63759	-17.3538	1.61911e-51	7.04246e-50	106.371
UNC5C	-3.39209	-2.70855	-17.3466	1.74354e-51	7.56763e-50	106.297
ATP6V1G2	-2.37908	-1.90333	-17.3296	2.07482e-51	8.94877e-50	106.124
ABHD3	-1.95691	1.89596	-17.3294	2.0799e-51	8.95185e-50	106.122
PTPN21	-1.49567	5.87632	-17.3253	2.16835e-51	9.313e-50	106.08
IGSF11	-2.924	-8.3488	-17.3206	2.27469e-51	9.72906e-50	106.033
SLC22A18AS	-2.62167	-2.70881	-17.3203	2.28149e-51	9.73784e-50	106.03
WISP2	-5.12318	1.44126	-17.317	2.36092e-51	1.0056e-49	105.996
SMPD1	-1.86657	6.31072	-17.3069	2.61715e-51	1.11242e-49	105.893
TNFRSF13B	-3.84131	-6.84464	-17.3065	2.62792e-51	1.11469e-49	105.889
MT1H	-4.96109	-2.78901	-17.2947	2.96559e-51	1.25533e-49	105.768
PRPH	-4.94067	2.25067	-17.2939	2.98999e-51	1.26306e-49	105.76
CFD	-3.9561	2.81207	-17.2828	3.34829e-51	1.40862e-49	105.648
TRAK2	-1.0362	1.16026	-17.277	3.55335e-51	1.49183e-49	105.588
P2RY4	-2.54546	-6.38682	-17.2701	3.8131e-51	1.59761e-49	105.518
CHAD	-3.5757	-1.15286	-17.267	3.93673e-51	1.64605e-49	105.486
CALY	-3.01354	-9.02918	-17.2566	4.37968e-51	1.82383e-49	105.38
RIMS4	-3.68204	-6.81261	-17.2514	4.61696e-51	1.91875e-49	105.328
CHGA	-7.86122	2.41487	-17.2463	4.86586e-51	2.0181e-49	105.275
TMEM82	-4.26545	2.44283	-17.2435	5.00704e-51	2.06902e-49	105.247
BCHE	-4.70473	-6.71618	-17.2307	5.70797e-51	2.34369e-49	105.116
ATP1A2	-5.60681	-3.68022	-17.224	6.11486e-51	2.50076e-49	105.048
NEFM	-3.31573	-0.097432	-17.2085	7.16024e-51	2.92246e-49	104.891
PPP2R3A	-2.19227	-2.07434	-17.2077	7.22225e-51	2.94192e-49	104.882
GRIK3	-3.64942	-4.60778	-17.1814	9.45115e-51	3.82706e-49	104.614
COL19A1	-2.60762	-0.372255	-17.1753	1.00599e-50	4.06554e-49	104.552
CDC14A	-1.9235	-2.40662	-17.1671	1.09375e-50	4.41154e-49	104.469
GSTM5	-3.47512	3.30871	-17.1667	1.09825e-50	4.42098e-49	104.465
GPR44	-3.19143	-3.95896	-17.1598	1.17783e-50	4.73208e-49	104.395
ABCC13	-4.11683	2.80591	-17.1495	1.30908e-50	5.24911e-49	104.29
RIOK3	-1.48469	6.03076	-17.1283	1.62504e-50	6.46551e-49	104.074
C6orf72	-1.05561	7.03325	-17.1221	1.73226e-50	6.87879e-49	104.011
SFRP1	-5.70935	3.06564	-17.1219	1.73584e-50	6.8797e-49	104.009
KLB	-2.56552	2.00827	-17.1164	1.83609e-50	7.26299e-49	103.953
PLAC2	-3.66173	2.73897	-17.1043	2.07828e-50	8.20522e-49	103.829
PLCE1	-2.30294	1.34626	-17.0883	2.44592e-50	9.63814e-49	103.667
P2RX4	-1.51196	-1.48773	-17.0857	2.51178e-50	9.87872e-49	103.641
GPR15	-4.72322	-4.07565	-17.0687	2.98853e-50	1.16866e-48	103.468
CCR10	-2.58798	1.79375	-17.0673	3.03102e-50	1.18302e-48	103.453
MUSTN1	-2.91562	-3.27544	-17.0496	3.63086e-50	1.40962e-48	103.274
INSL5	-5.62851	-5.13236	-17.0496	3.6322e-50	1.40962e-48	103.273
ACOX1	-1.42388	2.88838	-17.0193	4.94924e-50	1.91352e-48	102.965
SLCO4C1	-3.91679	-5.62879	-16.9895	6.70475e-50	2.57769e-48	102.663
HSD11B2	-2.64986	1.25646	-16.9615	8.92427e-50	3.4182e-48	102.378
CLCA4	-8.89311	-1.18927	-16.9596	9.09967e-50	3.47889e-48	102.359
ATP2B3	-2.25301	-2.45405	-16.9488	1.01603e-49	3.86996e-48	102.249
GPT	-4.15393	5.88528	-16.9392	1.11962e-49	4.24092e-48	102.152
CPEB3	-1.40572	-2.33457	-16.9359	1.15773e-49	4.36916e-48	102.119
LRRC1	-1.108	-0.818108	-16.9355	1.16251e-49	4.37914e-48	102.115
SQRDL	-1.72894	0.358279	-16.9225	1.32783e-49	4.99273e-48	101.982
ACO2	-1.13115	9.7832	-16.914	1.44786e-49	5.41431e-48	101.896
C1orf186	-3.10672	-0.546715	-16.9091	1.52223e-49	5.68207e-48	101.846
P2RY14	-2.97519	-2.91445	-16.9083	1.53535e-49	5.72065e-48	101.838
VIT	-3.473	-2.00666	-16.8972	1.71871e-49	6.38068e-48	101.725
MEP1B	-4.81827	-3.04497	-16.8828	1.99054e-49	7.34997e-48	101.579
ADRA1A	-1.91828	-7.81527	-16.8596	2.51985e-49	9.28771e-48	101.344
UGT1A8	-5.38836	4.13388	-16.8585	2.54795e-49	9.37445e-48	101.333
HTR7	-2.69406	-2.53674	-16.841	3.04474e-49	1.11424e-47	101.156
PYGM	-3.98096	1.15694	-16.8333	3.29399e-49	1.20117e-47	101.077
NAALADL1	-3.1943	-2.48045	-16.8296	3.42007e-49	1.24493e-47	101.04
ST6GALNAC6	-2.80193	3.45041	-16.8244	3.60552e-49	1.31011e-47	100.987
ANPEP	-4.79701	-1.38369	-16.8229	3.66367e-49	1.32889e-47	100.972
ASPG	-4.71	-5.21567	-16.7978	4.73068e-49	1.70987e-47	100.717
TAGLN3	-3.61811	-5.07767	-16.7944	4.89374e-49	1.76366e-47	100.683
CNNM4	-1.5522	2.22166	-16.7911	5.06487e-49	1.82105e-47	100.649
SORCS1	-4.33936	-2.83672	-16.7811	5.60266e-49	2.01088e-47	100.549
EIF4E3	-2.12018	4.43	-16.7781	5.7761e-49	2.06952e-47	100.518
TESK2	-1.49663	4.6258	-16.7596	6.97523e-49	2.48614e-47	100.33
SUCLG2	-1.24813	1.61443	-16.7581	7.08527e-49	2.52098e-47	100.315
ABHD5	-1.12815	1.11346	-16.7212	1.03084e-48	3.64255e-47	99.9414
NDRG2	-1.67892	5.87873	-16.7191	1.05321e-48	3.71519e-47	99.92
LGALS4	-2.13056	5.0656	-16.694	1.35873e-48	4.74401e-47	99.6663
PIK3C2G	-1.4615	-4.79072	-16.6758	1.63543e-48	5.69073e-47	99.4818
OSTBETA	-4.8	2.59124	-16.6681	1.76927e-48	6.13565e-47	99.4034
ANK3	-1.66411	0.411804	-16.6669	1.79017e-48	6.19767e-47	99.3917
ADH1B	-6.77682	-4.89934	-16.6631	1.86162e-48	6.43374e-47	99.3528
RPH3A	-2.10524	-7.92991	-16.6488	2.15083e-48	7.38403e-47	99.209
TMCC3	-2.41922	3.40781	-16.6452	2.23238e-48	7.65121e-47	99.1719
ITM2C	-2.65816	4.58718	-16.6417	2.3122e-48	7.91156e-47	99.1369
TNXB	-4.30214	2.51652	-16.6346	2.48629e-48	8.49309e-47	99.0646
C1orf210	-1.64069	3.72616	-16.5833	4.18631e-48	1.41823e-46	98.5458
PKNOX2	-3.04278	-0.215172	-16.5567	5.48424e-48	1.85183e-46	98.2769
GRIN2A	-3.0882	-5.54341	-16.5561	5.5125e-48	1.85832e-46	98.2718
ZG16	-8.89706	-1.30074	-16.552	5.74894e-48	1.92538e-46	98.2299
SULT1A1	-2.60701	7.18898	-16.5488	5.94138e-48	1.98659e-46	98.1972
NPY	-3.16439	-7.4201	-16.5359	6.77115e-48	2.26035e-46	98.067
C10orf54	-1.81268	-0.586279	-16.5079	8.99408e-48	2.9782e-46	97.7843
NBEAL1	-2.09606	-4.16754	-16.4743	1.26494e-47	4.16172e-46	97.4447
NKX2-3	-3.14732	0.182173	-16.4674	1.35626e-47	4.44793e-46	97.3753
HSD17B2	-4.25829	4.12407	-16.4329	1.92425e-47	6.27061e-46	97.027
GLRA4	-2.45894	-0.69794	-16.419	2.21352e-47	7.19044e-46	96.8875
CNGA3	-3.68877	-5.60848	-16.4085	2.46179e-47	7.98429e-46	96.7817
C11orf86	-5.40489	-4.35171	-16.405	2.55132e-47	8.26162e-46	96.7461
NEDD4L	-1.40443	4.71006	-16.4004	2.67193e-47	8.63853e-46	96.7001
SNTG2	-1.50098	-5.35401	-16.3923	2.90246e-47	9.3544e-46	96.6177
LOC389493	-2.16107	0.320176	-16.3892	2.99347e-47	9.61753e-46	96.5869
PJA2	-1.35965	2.46489	-16.3873	3.05078e-47	9.78634e-46	96.5681
LOC282997	-1.42907	-1.84728	-16.3655	3.80785e-47	1.21202e-45	96.3473
P2RY12	-3.02458	-5.49785	-16.3649	3.82948e-47	1.21702e-45	96.3417
NBPF1	-1.55199	1.58361	-16.3605	4.00416e-47	1.27056e-45	96.2973
ATP8B1	-1.65831	1.49607	-16.3576	4.12279e-47	1.30417e-45	96.2682
PACSIN2	-1.24148	0.234526	-16.3546	4.24978e-47	1.34066e-45	96.238
MYOM1	-3.57768	1.59315	-16.3546	4.25119e-47	1.34066e-45	96.2377
SSTR2	-2.81193	-5.91446	-16.3522	4.35641e-47	1.37174e-45	96.2133
C9orf4	-1.49709	-6.6566	-16.3334	5.26475e-47	1.65016e-45	96.0248
CHODL	-3.57062	-5.96448	-16.3173	6.20128e-47	1.93484e-45	95.8617
MGST3	-1.07096	7.63085	-16.2999	7.39351e-47	2.28942e-45	95.6867
RHAG	-1.12358	-9.05863	-16.2986	7.48888e-47	2.31546e-45	95.6739
LOC283267	-1.15113	-0.3	-16.288	8.33905e-47	2.57445e-45	95.5668
BCAR3	-1.53728	-1.31628	-16.2605	1.10041e-46	3.38703e-45	95.2907
ANGPTL1	-5.06205	-3.97675	-16.2603	1.10341e-46	3.39116e-45	95.288
MTM1	-1.37629	6.70066	-16.2346	1.42949e-46	4.3737e-45	95.0302
DUSP26	-2.9889	-4.24504	-16.203	1.9678e-46	5.98503e-45	94.712
PGM1	-1.69864	0.712915	-16.2016	1.99548e-46	6.06022e-45	94.6981
NRSN1	-2.61046	-4.58353	-16.1859	2.33827e-46	7.08034e-45	94.5402
SRI	-1.60373	9.33265	-16.1848	2.36375e-46	7.14694e-45	94.5294
LCN6	-1.71967	-6.85064	-16.17	2.74556e-46	8.26486e-45	94.3804
C1orf150	-2.58728	-2.61137	-16.1681	2.80005e-46	8.41655e-45	94.3608
ADAMDEC1	-4.27302	-0.950356	-16.1644	2.9047e-46	8.70562e-45	94.3243
AFF3	-3.43349	-4.48656	-16.1639	2.92036e-46	8.73978e-45	94.3189
CTSG	-4.69164	1.57215	-16.1634	2.93573e-46	8.77302e-45	94.3137
GDPD2	-4.37239	-3.97478	-16.1589	3.0722e-46	9.1675e-45	94.2684
FAM23A	-4.45613	5.25507	-16.1579	3.10164e-46	9.24189e-45	94.2589
LRRN2	-4.09269	2.21875	-16.1393	3.74237e-46	1.10548e-44	94.072
SCG3	-3.97059	-7.22885	-16.1378	3.79976e-46	1.11921e-44	94.0568
RBM47	-1.23503	4.31938	-16.1309	4.07317e-46	1.19631e-44	93.9876
KCNB1	-3.27027	0.524818	-16.1202	4.53925e-46	1.3313e-44	93.8798
GPR112	-1.31805	-6.9835	-16.1071	5.17845e-46	1.51444e-44	93.7486
GFRA3	-3.8829	-8.25614	-16.1063	5.22113e-46	1.52475e-44	93.7404
RYR3	-2.35332	-3.94769	-16.1038	5.35568e-46	1.56182e-44	93.7151
BAALC	-3.01305	-6.35184	-16.1018	5.46497e-46	1.59143e-44	93.695
HSD17B11	-1.31393	4.44909	-16.0861	6.40308e-46	1.86197e-44	93.5372
CCDC69	-2.74688	1.15717	-16.0809	6.7485e-46	1.95964e-44	93.4849
SH2D6	-3.58235	-6.93987	-16.0592	8.39606e-46	2.42094e-44	93.2674
ACAA2	-1.76749	4.93914	-16.031	1.11531e-45	3.20241e-44	92.9847
SLC30A4	-1.97183	-2.62602	-16.0242	1.19399e-45	3.42355e-44	92.9169
RAB27A	-1.72988	-1.05778	-16.0239	1.19833e-45	3.43119e-44	92.9133
TCP11L1	-1.22135	0.476441	-16.0231	1.20706e-45	3.45138e-44	92.906
LDHD	-3.69858	4.34984	-16.0087	1.39542e-45	3.96786e-44	92.7617
FGL2	-3.21151	0.60392	-15.9889	1.70404e-45	4.83872e-44	92.5627
TMEM59L	-3.48834	1.20959	-15.9814	1.83726e-45	5.2098e-44	92.4878
SNAP91	-3.05928	-2.51899	-15.9774	1.91267e-45	5.41615e-44	92.4477
PDE8A	-1.1379	0.060699	-15.9746	1.96731e-45	5.56319e-44	92.4197
P2RY1	-3.11096	3.06509	-15.9659	2.1488e-45	6.05142e-44	92.3318
CUX2	-2.06301	-8.65587	-15.9618	2.23855e-45	6.29554e-44	92.2911
EFHC2	-3.08001	-8.02118	-15.9379	2.8476e-45	7.96476e-44	92.0515
FUT9	-2.05892	-8.4266	-15.9352	2.92652e-45	8.17436e-44	92.0243
FAM19A2	-2.20812	-2.20315	-15.9298	3.08975e-45	8.61855e-44	91.9703
PDE2A	-2.96876	-3.1368	-15.9227	3.31554e-45	9.23582e-44	91.9
GSN	-2.08729	1.69861	-15.916	3.54661e-45	9.82616e-44	91.833
VAMP2	-1.3387	0.12437	-15.8997	4.17935e-45	1.15636e-43	91.6695
C6orf186	-2.96694	-7.06442	-15.8977	4.26471e-45	1.17839e-43	91.6494
TRPM6	-5.02853	0.510262	-15.896	4.33798e-45	1.19703e-43	91.6325
SEMA6D	-3.47767	0.685314	-15.882	4.99497e-45	1.37462e-43	91.4921
CYTSA	-1.09136	-0.401759	-15.8801	5.09042e-45	1.39901e-43	91.4732
SCNN1B	-5.79968	4.53429	-15.873	5.46384e-45	1.49963e-43	91.4027
JPH4	-2.66211	-1.96256	-15.8662	5.85248e-45	1.59988e-43	91.3343
CRYBA2	-3.30829	-0.238649	-15.8632	6.03368e-45	1.64723e-43	91.304
RNF112	-2.59534	-3.46127	-15.8473	7.07791e-45	1.92463e-43	91.1451
CPM	-2.93685	-0.983554	-15.8443	7.29016e-45	1.97711e-43	91.1156
VWC2	-2.08241	0.0227695	-15.8363	7.90287e-45	2.14045e-43	91.0353
CCBP2	-2.55519	3.15723	-15.8338	8.10761e-45	2.19012e-43	91.0098
MYL6	-1.14651	6.79688	-15.8289	8.51009e-45	2.29582e-43	90.9616
HPGD	-3.47003	3.73919	-15.8271	8.66956e-45	2.33577e-43	90.9431
GAB1	-1.20426	2.80975	-15.8082	1.04817e-44	2.81293e-43	90.7542
SCN2B	-3.70099	-5.31623	-15.8041	1.09214e-44	2.9233e-43	90.7132
TMEM196	-1.09036	-2.57411	-15.8005	1.13202e-44	3.02608e-43	90.6775
PDZD4	-3.49281	-1.03309	-15.7988	1.15127e-44	3.07354e-43	90.6608
TRPV3	-3.41417	-4.67314	-15.7986	1.15408e-44	3.07705e-43	90.6583
GNG13	-3.16502	-0.415483	-15.79	1.25802e-44	3.34549e-43	90.5725
ACSM5	-2.69441	-8.70744	-15.7844	1.33101e-44	3.53076e-43	90.5163
CXCL12	-2.97156	-2.71421	-15.7743	1.47235e-44	3.88525e-43	90.4159
NBLA00301	-4.6218	-0.602253	-15.7717	1.51127e-44	3.97774e-43	90.3899
ABCD3	-1.11421	0.615378	-15.7687	1.55759e-44	4.08916e-43	90.3598
PPY	-1.96353	-0.0885634	-15.7508	1.86485e-44	4.87091e-43	90.1806
TTC22	-2.00162	5.43172	-15.7329	2.22955e-44	5.80872e-43	90.0028
C14orf180	-2.88213	-7.7407	-15.7264	2.37953e-44	6.19162e-43	89.938
C12orf53	-2.73206	-5.28704	-15.7109	2.78148e-44	7.20099e-43	89.7826
GREM2	-4.89062	-3.23594	-15.7022	3.03403e-44	7.8252e-43	89.6961
CPT1A	-1.34548	9.29044	-15.6958	3.23628e-44	8.32592e-43	89.6318
SGK1	-2.4697	0.192844	-15.6888	3.46891e-44	8.87989e-43	89.5627
BEST2	-5.99683	1.28891	-15.6851	3.60115e-44	9.20692e-43	89.5255
EPHA6	-2.74737	-5.14658	-15.6817	3.72435e-44	9.51007e-43	89.492
FAM163B	-2.09836	-7.72987	-15.6797	3.80273e-44	9.69814e-43	89.4713
GLIPR2	-2.23259	2.82639	-15.6685	4.25026e-44	1.0826e-42	89.3605
SRPX	-3.11465	4.78581	-15.6354	5.9215e-44	1.50085e-42	89.0304
MT1X	-2.43595	6.19061	-15.6273	6.42333e-44	1.62603e-42	88.9494
FHL1	-3.39119	0.611238	-15.6262	6.49382e-44	1.64185e-42	88.9386
ALK	-2.26994	-6.944	-15.6206	6.86606e-44	1.72957e-42	88.8831
GRIA3	-2.50209	-2.44048	-15.6135	7.37169e-44	1.8524e-42	88.8123
B3GALT4	-1.67834	-1.08148	-15.6039	8.12149e-44	2.03832e-42	88.7159
SEC14L5	-2.85195	2.06044	-15.5924	9.11091e-44	2.27275e-42	88.6015
ABCA9	-3.61752	-4.62005	-15.5795	1.03564e-43	2.57406e-42	88.4739
SFRP5	-4.07082	-1.59401	-15.5739	1.09601e-43	2.71752e-42	88.4175
SLITRK3	-3.83481	-3.84074	-15.5651	1.1962e-43	2.9588e-42	88.3304
DPYSL5	-2.75335	-6.11503	-15.563	1.2219e-43	3.01874e-42	88.3093
MMP28	-3.62784	0.516071	-15.5508	1.38087e-43	3.3992e-42	88.1875
TSPAN7	-3.22111	-1.34854	-15.5489	1.4067e-43	3.45862e-42	88.1691
ABCB5	-2.84642	0.837436	-15.5451	1.46101e-43	3.58785e-42	88.1314
MT1DP	-2.19647	-5.78433	-15.5345	1.62533e-43	3.96767e-42	88.0253
SEPP1	-3.44767	6.7085	-15.5328	1.6521e-43	4.02343e-42	88.009
C1orf173	-2.02084	-4.28631	-15.5321	1.66354e-43	4.0465e-42	88.0022
HEPACAM	-2.07299	-8.02935	-15.5228	1.8255e-43	4.43521e-42	87.9097
ENHO	-2.9508	-3.86466	-15.514	1.99386e-43	4.8328e-42	87.8219
NOVA1	-3.64037	-2.46176	-15.5093	2.08971e-43	5.05916e-42	87.7751
RELL1	-1.63649	0.629055	-15.5043	2.19613e-43	5.31055e-42	87.7257
ABI3BP	-3.90106	-0.620555	-15.4802	2.79387e-43	6.72429e-42	87.486
OSTalpha	-4.25004	-2.60341	-15.473	3.00158e-43	7.20731e-42	87.4147
NR5A2	-2.60599	2.57933	-15.4636	3.29894e-43	7.90283e-42	87.3206
CASD1	-1.28196	2.74513	-15.4607	3.39532e-43	8.12423e-42	87.292
TST	-1.64371	5.15648	-15.4541	3.62598e-43	8.65597e-42	87.2265
MAPK4	-3.90763	-7.2261	-15.4389	4.21707e-43	1.00158e-41	87.0762
UNC80	-2.02697	0.269655	-15.4389	4.22001e-43	1.00158e-41	87.0755
RUNDC3B	-2.82677	2.16887	-15.4329	4.47963e-43	1.06075e-41	87.0161
MALL	-2.23809	2.29228	-15.4214	5.02405e-43	1.18693e-41	86.9019
CWH43	-6.02432	-2.88352	-15.4193	5.12724e-43	1.20991e-41	86.8817
BRP44L	-1.37255	1.82012	-15.4192	5.13353e-43	1.21001e-41	86.8805
MT1G	-4.08907	5.84373	-15.4159	5.30687e-43	1.24943e-41	86.8474
PTPRH	-2.24148	5.15353	-15.413	5.46065e-43	1.28416e-41	86.819
EPHA5	-2.10089	-6.51304	-15.4037	5.99016e-43	1.40546e-41	86.7269
BEND4	-2.73489	-6.14512	-15.3913	6.7818e-43	1.58577e-41	86.6033
CTNNA3	-2.05387	-5.92868	-15.3847	7.24461e-43	1.69206e-41	86.5376
PADI2	-4.07516	6.7411	-15.3773	7.79433e-43	1.81632e-41	86.4648
DNER	-3.48234	-6.54692	-15.3591	9.34351e-43	2.16504e-41	86.2844
MADCAM1	-4.06694	2.35449	-15.3564	9.6035e-43	2.22277e-41	86.257
SLC17A4	-4.09312	-0.0149877	-15.3547	9.7608e-43	2.25664e-41	86.2409
PTPRZ1	-3.74466	-7.05934	-15.3521	1.00257e-42	2.31266e-41	86.2142
GPM6B	-2.89417	1.02297	-15.3503	1.01981e-42	2.34716e-41	86.1972
PTGS1	-2.81347	6.66087	-15.3498	1.02519e-42	2.3569e-41	86.192
GPM6A	-5.19973	-3.6862	-15.3443	1.08352e-42	2.48822e-41	86.1369
CCL14	-3.46629	-3.53862	-15.3432	1.09545e-42	2.5128e-41	86.126
SIAE	-1.71657	1.09013	-15.3305	1.24253e-42	2.83751e-41	86.0006
BMX	-3.6092	3.0738	-15.3149	1.45144e-42	3.28535e-41	85.8459
C5orf40	-1.92662	-7.75969	-15.3119	1.49567e-42	3.38173e-41	85.8161
C20orf200	-3.23517	-5.76275	-15.308	1.55393e-42	3.50959e-41	85.778
STAB2	-3.00252	0.157691	-15.3053	1.59716e-42	3.59931e-41	85.7507
TOM1L2	-1.22218	0.956229	-15.3028	1.63678e-42	3.68454e-41	85.7263
PKD1L2	-2.18376	0.367391	-15.2997	1.68862e-42	3.79707e-41	85.6953
LITAF	-1.2074	0.376607	-15.2853	1.94855e-42	4.37199e-41	85.5528
CCDC68	-2.40349	0.813076	-15.2847	1.9608e-42	4.39468e-41	85.5465
PPAP2B	-1.53688	-0.556219	-15.27	2.26855e-42	5.06782e-41	85.4014
C17orf91	-1.96832	-1.63866	-15.2566	2.59054e-42	5.7683e-41	85.2693
B4GALNT2	-6.32769	-3.65269	-15.2461	2.8768e-42	6.37805e-41	85.165
FAM75C1	-1.02609	-6.42489	-15.2434	2.95536e-42	6.53809e-41	85.1382
WSCD1	-3.62295	1.5934	-15.2424	2.98528e-42	6.59717e-41	85.1282
ANO5	-4.49957	-6.97381	-15.2368	3.1543e-42	6.9632e-41	85.0734
LMX1A	-2.85704	-9.04686	-15.2343	3.235e-42	7.13369e-41	85.0482
LPAR1	-2.64695	3.24852	-15.2245	3.56554e-42	7.83733e-41	84.9514
PAFAH2	-1.19059	7.48538	-15.1965	4.70845e-42	1.03054e-40	84.6746
SLC10A2	-2.6725	-0.548405	-15.1891	5.06938e-42	1.10717e-40	84.6011
MT2A	-2.62243	3.80065	-15.1823	5.42272e-42	1.18058e-40	84.5341
SDHD	-1.02027	1.61268	-15.1816	5.45996e-42	1.18743e-40	84.5273
CA10	-2.27216	-8.5581	-15.1794	5.58053e-42	1.21236e-40	84.5055
HRASLS2	-3.78796	-5.48756	-15.1783	5.63812e-42	1.22358e-40	84.4953
FLJ41941	-1.40995	-0.497923	-15.1632	6.55513e-42	1.41959e-40	84.3453
TRANK1	-1.9993	-1.10663	-15.162	6.63369e-42	1.43509e-40	84.3335
HTR3C	-2.47739	-6.13435	-15.1494	7.51425e-42	1.62216e-40	84.2094
CBX7	-1.75416	-2.21955	-15.1404	8.21451e-42	1.77147e-40	84.1207
PTN	-2.8571	-0.789355	-15.1338	8.77463e-42	1.88829e-40	84.0551
NEGR1	-3.17784	-2.84942	-15.1071	1.14263e-41	2.45121e-40	83.7923
ARHGAP20	-2.98598	-7.85732	-15.1033	1.18693e-41	2.54361e-40	83.7544
FAM181B	-2.64941	-7.44824	-15.0996	1.23103e-41	2.63535e-40	83.7181
ZMAT4	-1.91084	-2.64138	-15.0825	1.45871e-41	3.11303e-40	83.5492
SDCBP2	-2.80227	7.04354	-15.0812	1.47714e-41	3.14909e-40	83.5367
STMN2	-4.34754	-3.3466	-15.0785	1.5182e-41	3.22656e-40	83.5094
CAND2	-2.16155	-4.30091	-15.0735	1.59389e-41	3.38042e-40	83.461
SECTM1	-3.32577	-0.82007	-15.0725	1.61108e-41	3.41336e-40	83.4503
C1orf115	-2.36579	7.67806	-15.0681	1.68232e-41	3.55696e-40	83.4073
NTN1	-2.95385	-3.98569	-15.0453	2.10787e-41	4.43842e-40	83.1828
CDHR5	-2.70875	10.2115	-15.0451	2.1127e-41	4.44404e-40	83.1806
DNASE1L3	-4.95921	-2.21157	-15.0361	2.30998e-41	4.85404e-40	83.0917
PLCL2	-2.88359	-0.770571	-14.9827	3.91523e-41	8.1521e-40	82.5666
SLITRK2	-2.38118	0.433944	-14.9751	4.22402e-41	8.78613e-40	82.4911
LOC401093	-2.3893	-2.14963	-14.9652	4.65411e-41	9.66116e-40	82.3946
CLEC4G	-2.83665	-6.2322	-14.9588	4.95861e-41	1.02725e-39	82.3315
EPB41L3	-3.41058	1.0238	-14.9516	5.32432e-41	1.09968e-39	82.2607
ADCY9	-1.48985	-2.37031	-14.944	5.73927e-41	1.18419e-39	82.186
CRADD	-1.09824	-2.22523	-14.9404	5.94675e-41	1.22577e-39	82.1507
ACTL6B	-1.35391	-4.10982	-14.9397	5.98992e-41	1.23305e-39	82.1435
ANK2	-3.55658	-4.29455	-14.9396	5.99408e-41	1.23305e-39	82.1428
ASB2	-3.4275	-3.53307	-14.9394	6.00778e-41	1.23463e-39	82.1405
SEZ6	-2.52681	-0.421017	-14.9286	6.68603e-41	1.36854e-39	82.034
MYPN	-2.88631	-6.52794	-14.9268	6.80248e-41	1.39098e-39	82.0169
FLVCR2	-2.33872	5.43204	-14.9252	6.91067e-41	1.4117e-39	82.0012
OGN	-5.59795	-1.52548	-14.9233	7.04563e-41	1.43784e-39	81.9819
KAT2B	-1.83322	-2.06157	-14.9211	7.19671e-41	1.46576e-39	81.9608
ZDHHC22	-2.20519	-3.00055	-14.9174	7.46516e-41	1.51893e-39	81.9243
TCEAL5	-2.1376	-6.79322	-14.8955	9.26908e-41	1.87114e-39	81.709
GFI1B	-2.94375	-6.50202	-14.8853	1.02463e-40	2.0603e-39	81.6092
SLC9A9	-2.66501	-1.31252	-14.879	1.09118e-40	2.18983e-39	81.5466
NPTX1	-4.56917	-4.49615	-14.8671	1.22635e-40	2.45389e-39	81.4304
MPPE1	-1.15441	4.96181	-14.8647	1.25604e-40	2.51086e-39	81.4066
HEPN1	-1.75249	-6.16423	-14.8642	1.26191e-40	2.52013e-39	81.4019
PEX11A	-1.23349	-0.204882	-14.8502	1.44909e-40	2.88273e-39	81.2643
SLC13A1	-1.94654	-7.21373	-14.8392	1.61558e-40	3.20461e-39	81.1561
WDR78	-2.6044	-3.31238	-14.8379	1.63587e-40	3.24173e-39	81.1436
LOC643763	-3.03937	-2.35516	-14.8377	1.63861e-40	3.24405e-39	81.142
NEFL	-4.24193	-0.171039	-14.8306	1.75757e-40	3.47286e-39	81.0722
C21orf88	-4.17247	-6.22993	-14.8199	1.954e-40	3.84987e-39	80.9668
STOX2	-2.40344	0.869594	-14.799	2.39886e-40	4.72181e-39	80.7627
GRIA4	-2.69527	-3.73788	-14.779	2.92142e-40	5.72298e-39	80.5666
ACAT1	-1.42485	-0.506781	-14.7784	2.93893e-40	5.75179e-39	80.5606
CD163L1	-3.47927	-0.204341	-14.7703	3.18442e-40	6.22587e-39	80.4808
AQP7	-2.90699	-3.38521	-14.7702	3.18723e-40	6.22587e-39	80.4799
KIF1A	-4.24341	-3.53459	-14.7533	3.76328e-40	7.33714e-39	80.3146
FMO4	-1.88758	4.23557	-14.7524	3.79656e-40	7.39501e-39	80.3058
HTR4	-3.88028	-3.24026	-14.7511	3.84687e-40	7.48591e-39	80.2927
FAM150B	-2.9007	-1.36882	-14.7354	4.48785e-40	8.70025e-39	80.1394
CCBE1	-3.9002	-6.31499	-14.7291	4.77611e-40	9.25033e-39	80.0774
MXD1	-1.81013	1.19016	-14.7249	4.97759e-40	9.63147e-39	80.0363
KRT9	-1.5653	-2.42695	-14.7221	5.11332e-40	9.8848e-39	80.0095
DPF3	-2.92039	-3.23795	-14.7143	5.52335e-40	1.06274e-38	79.9328
P2RX1	-2.91483	-6.20205	-14.7105	5.73103e-40	1.10167e-38	79.8961
SDPR	-2.92896	-2.69335	-14.7098	5.77007e-40	1.10751e-38	79.8893
DSC2	-1.62741	5.09346	-14.6955	6.64204e-40	1.26848e-38	79.7493
LPHN3	-3.09456	3.00943	-14.6902	7.00074e-40	1.33574e-38	79.6969
ANO10	-1.12596	3.1479	-14.6897	7.03421e-40	1.34088e-38	79.6922
HAPLN1	-2.97299	3.93433	-14.6886	7.10958e-40	1.35399e-38	79.6816
FAM129A	-3.03797	6.34121	-14.677	7.96578e-40	1.51144e-38	79.5684
TMEM35	-3.85344	-2.07102	-14.6709	8.46313e-40	1.60432e-38	79.5082
ADH1C	-5.86709	6.58114	-14.6657	8.90555e-40	1.68508e-38	79.4574
FMN2	-3.98812	-3.83782	-14.6607	9.35064e-40	1.76767e-38	79.4089
AGXT2L2	-1.19061	1.23235	-14.6581	9.59123e-40	1.80982e-38	79.3836
LOC339524	-2.72309	-3.17395	-14.6546	9.92757e-40	1.86984e-38	79.3493
TMEM20	-1.43793	0.346835	-14.6488	1.05058e-39	1.97694e-38	79.293
TNFRSF17	-4.31198	-4.74912	-14.647	1.0701e-39	2.01183e-38	79.2747
GNG2	-2.0563	-1.1773	-14.645	1.09111e-39	2.04945e-38	79.2553
PHGR1	-3.09844	5.37691	-14.6396	1.15071e-39	2.15941e-38	79.2024
VPS4B	-1.02516	8.15724	-14.633	1.22737e-39	2.29699e-38	79.1383
RIC3	-3.10358	1.26154	-14.6125	1.5007e-39	2.80341e-38	78.9382
LTC4S	-2.36862	1.3725	-14.5864	1.93933e-39	3.60966e-38	78.6831
GLYATL3	-1.52816	-5.47709	-14.5838	1.98795e-39	3.69344e-38	78.6584
LDB3	-3.89666	-0.759127	-14.5757	2.15355e-39	3.99028e-38	78.5788
DPT	-4.70645	-1.92097	-14.5616	2.47209e-39	4.56813e-38	78.4416
SLC8A3	-2.10711	-3.88499	-14.5545	2.64979e-39	4.8877e-38	78.3725
INA	-3.43381	0.952099	-14.5519	2.71755e-39	5.0082e-38	78.3474
MORN5	-3.40218	-8.64935	-14.5449	2.91005e-39	5.34855e-38	78.2793
CSRP1	-1.69299	2.64102	-14.5415	3.01094e-39	5.52903e-38	78.2454
C4orf19	-1.77039	0.911549	-14.5406	3.03632e-39	5.57066e-38	78.237
EMILIN3	-2.38366	-2.87961	-14.5377	3.12447e-39	5.72216e-38	78.2085
CNTN1	-4.01778	0.170132	-14.5355	3.192e-39	5.84063e-38	78.1872
2018-03-08	-1.5061	-1.98221	-14.5354	3.19519e-39	5.84124e-38	78.1863
CD300LG	-2.95695	-8.24716	-14.5273	3.45783e-39	6.29337e-38	78.1077
SSTR3	-1.71138	-7.43219	-14.5201	3.71271e-39	6.73934e-38	78.0369
PCDH10	-2.78491	-1.03293	-14.5113	4.04566e-39	7.33076e-38	77.9514
EPHA7	-4.06377	0.794923	-14.5104	4.0807e-39	7.38772e-38	77.9429
CLEC10A	-3.80791	-2.85703	-14.5072	4.21084e-39	7.61661e-38	77.9116
PGA3	-1.98249	-5.11156	-14.5063	4.25022e-39	7.67432e-38	77.9024
LILRB5	-3.48959	-4.21118	-14.506	4.2596e-39	7.6845e-38	77.9002
GPX3	-2.84173	-0.451513	-14.5017	4.44248e-39	8.00739e-38	77.8583
PBLD	-2.37419	-0.7741	-14.4952	4.73386e-39	8.5251e-38	77.7951
PDE7B	-2.56231	2.6635	-14.4881	5.07595e-39	9.11717e-38	77.7257
PCOLCE2	-4.56894	2.59277	-14.483	5.33397e-39	9.56388e-38	77.6764
EDN3	-4.32604	-3.97458	-14.4779	5.60991e-39	1.00499e-37	77.6262
TSPAN1	-2.73442	2.37861	-14.4626	6.51386e-39	1.15883e-37	77.4776
ARRDC4	-1.69299	-0.233783	-14.4549	7.02178e-39	1.24811e-37	77.4028
KLRF1	-1.85964	-0.283176	-14.449	7.43749e-39	1.31972e-37	77.3456
ABCC8	-2.58816	-6.43981	-14.4474	7.55869e-39	1.34007e-37	77.3295
CLDN5	-2.6233	-2.22625	-14.4431	7.88369e-39	1.39648e-37	77.2877
DSCAML1	-3.25974	-6.33087	-14.4317	8.81159e-39	1.55816e-37	77.1769
DCLK1	-3.44362	-5.13231	-14.4199	9.89027e-39	1.74589e-37	77.062
MOBKL2B	-1.63135	3.9118	-14.4182	1.00538e-38	1.77172e-37	77.0457
GNAO1	-3.52806	-3.64305	-14.4095	1.09411e-38	1.92313e-37	76.9616
KCTD9	-1.27478	-3.35507	-14.4084	1.10605e-38	1.94188e-37	76.9508
BTD	-1.11074	-1.31575	-14.4083	1.10667e-38	1.94188e-37	76.9502
PQLC1	-1.16534	0.152051	-14.4002	1.19823e-38	2.09894e-37	76.8711
CPNE8	-2.51109	-4.94432	-14.3855	1.38288e-38	2.41622e-37	76.7285
CNTN4	-2.85494	-3.88639	-14.3821	1.43e-38	2.49641e-37	76.6952
ATP1B2	-2.53838	-5.39802	-14.3778	1.49065e-38	2.59788e-37	76.6539
SFTA1P	-2.17263	-5.89143	-14.3766	1.50924e-38	2.62582e-37	76.6416
ACVRL1	-1.9081	8.33701	-14.373	1.56318e-38	2.71737e-37	76.6066
ARL14	-2.47714	-1.1322	-14.361	1.7564e-38	3.04809e-37	76.4907
FAM162A	-1.16632	2.79148	-14.3544	1.87332e-38	3.24276e-37	76.4266
C2orf58	-2.00924	-6.22727	-14.3464	2.02563e-38	3.48294e-37	76.3488
CELF4	-2.44297	-7.03567	-14.3463	2.02782e-38	3.48354e-37	76.3477
PLCXD3	-3.47259	1.04098	-14.3462	2.02938e-38	3.48354e-37	76.3469
FCRL4	-2.46795	-5.58215	-14.3452	2.05006e-38	3.51317e-37	76.3369
IGFBP6	-2.53843	-2.29474	-14.3382	2.19333e-38	3.74617e-37	76.2697
BEND5	-2.73029	-5.15816	-14.3302	2.37139e-38	4.04357e-37	76.192
GDPD3	-2.63806	5.5854	-14.3292	2.39554e-38	4.08137e-37	76.1819
ACACB	-1.9961	-0.734141	-14.3236	2.52858e-38	4.29733e-37	76.1281
OCEL1	-1.28996	-1.35876	-14.3212	2.59017e-38	4.39473e-37	76.1042
MARVELD3	-1.2026	2.7047	-14.3196	2.62946e-38	4.45771e-37	76.0892
TM6SF2	-3.16157	-6.36908	-14.3176	2.68224e-38	4.54343e-37	76.0694
CPNE5	-2.37912	-1.78451	-14.3157	2.73289e-38	4.62541e-37	76.0508
ACSBG1	-1.61495	1.54525	-14.3081	2.94147e-38	4.96207e-37	75.9777
NR1H4	-4.43604	-5.22967	-14.2718	4.19061e-38	7.03461e-37	75.6255
ABCA6	-3.50927	-4.85821	-14.2681	4.3402e-38	7.27976e-37	75.5907
UGT1A10	-4.51842	-1.44704	-14.2662	4.42309e-38	7.4067e-37	75.5718
DNAJC28	-1.50703	-6.0218	-14.2635	4.5412e-38	7.59828e-37	75.5456
KIAA0513	-2.20452	6.53833	-14.2582	4.78259e-38	7.99564e-37	75.4941
SLC23A1	-3.29784	3.76802	-14.2538	4.99049e-38	8.33644e-37	75.4518
IGJ	-5.70812	0.967401	-14.2376	5.84107e-38	9.73407e-37	75.2952
FAM63A	-1.15814	3.25186	-14.2376	5.84139e-38	9.73407e-37	75.2951
C1QTNF2	-1.93228	-5.12033	-14.2366	5.89887e-38	9.82188e-37	75.2854
MGC42105	-1.83226	-6.66694	-14.2091	7.70636e-38	1.27693e-36	75.0195
GNG12	-1.11375	8.26601	-14.2064	7.9083e-38	1.30828e-36	74.9938
RGS13	-3.36715	-4.77649	-14.2048	8.03195e-38	1.32766e-36	74.9783
PPP1R14A	-2.42818	0.320561	-14.1922	9.07718e-38	1.49803e-36	74.8566
ATP5A1	-1.12542	2.55095	-14.1841	9.82026e-38	1.61417e-36	74.7784
CLIC5	-2.18961	5.1185	-14.1746	1.07774e-37	1.77009e-36	74.6858
RCAN2	-2.1006	5.58983	-14.1706	1.11955e-37	1.83435e-36	74.648
TLR3	-2.3276	-0.181823	-14.1688	1.13959e-37	1.8657e-36	74.6303
RXRA	-1.00289	2.11249	-14.1636	1.1988e-37	1.96107e-36	74.5799
ASAP3	-2.08344	-3.30283	-14.1618	1.21956e-37	1.99343e-36	74.5629
SLC35D1	-1.26555	2.50624	-14.1514	1.34894e-37	2.19792e-36	74.4626
CHMP1B	-1.0003	-1.40798	-14.1427	1.4679e-37	2.38606e-36	74.3785
NCAM1	-3.16816	1.72804	-14.1356	1.57357e-37	2.55581e-36	74.3093
MAPK3	-1.15764	2.02793	-14.1349	1.58438e-37	2.57134e-36	74.3025
CCDC152	-2.77375	-0.867504	-14.1341	1.59621e-37	2.58848e-36	74.2951
MMRN1	-4.2301	4.00775	-14.1262	1.72296e-37	2.78962e-36	74.2191
C2orf7	-1.20309	3.92089	-14.1186	1.85497e-37	3.00099e-36	74.1457
DYRK2	-1.01583	-0.158526	-14.106	2.09647e-37	3.38635e-36	74.0239
C1orf201	-1.10654	-2.82697	-14.102	2.1793e-37	3.51462e-36	73.9854
LOC645323	-1.90723	-7.34707	-14.0958	2.31292e-37	3.72717e-36	73.9262
SLC9A1	-1.33848	7.1968	-14.0955	2.31995e-37	3.73558e-36	73.9232
GGTA1	-2.84927	3.62097	-14.0948	2.3362e-37	3.7588e-36	73.9162
TMEM171	-2.66187	-0.275237	-14.0861	2.54121e-37	4.08224e-36	73.8325
LAMA1	-3.16822	2.68388	-14.0723	2.90531e-37	4.65621e-36	73.6994
KCNK3	-3.43364	-7.01246	-14.0699	2.97236e-37	4.75995e-36	73.6767
ATP2B2	-1.87808	-8.40528	-14.0655	3.10409e-37	4.96316e-36	73.6335
MGLL	-1.40051	1.4496	-14.0593	3.29455e-37	5.26358e-36	73.5743
C7	-4.82565	4.18726	-14.0459	3.75115e-37	5.97913e-36	73.4452
SCN4B	-2.59498	2.37085	-14.0455	3.76624e-37	5.99852e-36	73.4412
FCER2	-3.83985	-6.55279	-14.0431	3.8548e-37	6.13006e-36	73.4181
KIAA1045	-2.31466	-3.531	-14.0421	3.89196e-37	6.17957e-36	73.4085
SLC5A11	-2.73571	-7.71437	-14.035	4.16981e-37	6.61051e-36	73.3399
C1QTNF7	-3.19569	-3.83059	-14.0306	4.34801e-37	6.88771e-36	73.2983
ATP13A4	-3.54605	-6.75316	-14.0288	4.42743e-37	7.0081e-36	73.2803
ZSWIM6	-1.03935	2.39939	-14.0265	4.52721e-37	7.14952e-36	73.2581
CEACAM1	-2.18695	2.85764	-14.0256	4.56579e-37	7.2049e-36	73.2497
PTH1R	-2.71138	-5.91241	-14.0055	5.54459e-37	8.70929e-36	73.0565
CES2	-2.26028	9.50884	-14.001	5.78905e-37	9.08633e-36	73.0136
ADCY5	-3.88511	-4.3455	-13.9998	5.85621e-37	9.17771e-36	73.0021
PTGER4	-1.87722	2.8841	-13.998	5.96079e-37	9.33448e-36	72.9845
DIRC3	-2.03192	0.869258	-13.9956	6.10341e-37	9.55053e-36	72.961
RGS9	-2.64863	0.0990891	-13.9926	6.28164e-37	9.81675e-36	72.9323
FAM189A2	-3.10725	-4.65605	-13.9893	6.48207e-37	1.01199e-35	72.9011
FCER1A	-3.16675	-0.745218	-13.9844	6.79692e-37	1.06034e-35	72.8539
GPER	-2.87393	-3.19716	-13.9778	7.24604e-37	1.12698e-35	72.7903
IL10RB	-1.09545	5.18751	-13.9737	7.53546e-37	1.17022e-35	72.7513
CCDC13	-1.69129	-5.00867	-13.9731	7.58335e-37	1.17677e-35	72.745
PAG1	-1.8378	-1.17297	-13.9592	8.67102e-37	1.34453e-35	72.6117
ZBTB16	-3.594	-5.50212	-13.9577	8.79339e-37	1.36248e-35	72.5978
WDR7	-1.20227	1.3273	-13.9536	9.15704e-37	1.41669e-35	72.5575
SYT4	-3.45598	-6.02376	-13.9417	1.02643e-36	1.58322e-35	72.4439
RBM20	-2.53177	-5.58655	-13.9374	1.07042e-36	1.64859e-35	72.4022
TMEM59	-1.05964	8.8557	-13.921	1.25339e-36	1.9275e-35	72.2452
B3GNT7	-4.21298	-0.745413	-13.9142	1.33901e-36	2.05609e-35	72.1795
HRNBP3	-3.75064	-6.09964	-13.9002	1.53164e-36	2.34312e-35	72.0458
KCNG3	-2.48965	1.48823	-13.8991	1.54847e-36	2.36709e-35	72.0349
RBPMS2	-3.34349	-2.37001	-13.8989	1.55074e-36	2.3688e-35	72.0335
KIAA1683	-2.32118	-3.81	-13.887	1.73909e-36	2.64863e-35	71.9195
MAPK10	-2.63274	-2.41212	-13.8789	1.88026e-36	2.85939e-35	71.8418
KCNS2	-1.67869	-6.08305	-13.8786	1.88724e-36	2.86576e-35	71.8381
C15orf48	-2.92061	3.58128	-13.8753	1.94746e-36	2.95502e-35	71.8069
CD1D	-2.14274	1.54696	-13.8721	2.0079e-36	3.04448e-35	71.7765
LONRF2	-4.12382	-4.51238	-13.8701	2.04744e-36	3.09756e-35	71.7571
2018-03-02	-1.15742	5.01793	-13.8658	2.13442e-36	3.22204e-35	71.7157
SYP	-2.24427	-2.4741	-13.8648	2.15385e-36	3.24898e-35	71.7067
RBKS	-1.35614	-0.348059	-13.8417	2.6916e-36	4.04825e-35	71.485
EPM2A	-1.35375	-4.278	-13.8396	2.74589e-36	4.12688e-35	71.4652
MRGPRX2	-1.04778	-5.67173	-13.8266	3.11145e-36	4.66944e-35	71.3409
GALNTL1	-3.30034	-5.77434	-13.8252	3.15542e-36	4.72852e-35	71.3269
HOXD1	-3.01983	3.233	-13.8243	3.18353e-36	4.76716e-35	71.3181
C14orf43	-1.12409	-1.57272	-13.8229	3.22576e-36	4.82689e-35	71.305
ITM2A	-2.60226	-0.738817	-13.8091	3.68127e-36	5.48451e-35	71.1736
WDR17	-2.80306	-5.75563	-13.802	3.94329e-36	5.86636e-35	71.1052
NEUROD1	-3.9153	-6.29779	-13.8007	3.99107e-36	5.93315e-35	71.0933
CEND1	-2.07114	1.48483	-13.7907	4.39586e-36	6.53017e-35	70.9972
LOC646627	-5.23638	-1.96106	-13.7815	4.79992e-36	7.11497e-35	70.9097
OAF	-1.0316	8.81583	-13.7789	4.92105e-36	7.28926e-35	70.8849
TCF21	-2.56878	-2.70611	-13.7696	5.38518e-36	7.95953e-35	70.7953
KIAA1370	-1.23363	-2.53371	-13.7664	5.55317e-36	8.20191e-35	70.7647
FOXF2	-2.47552	-0.2848	-13.7606	5.86975e-36	8.65704e-35	70.7096
LIMA1	-1.42422	1.78848	-13.7605	5.87481e-36	8.65828e-35	70.7087
INCA1	-1.38691	-5.30292	-13.7574	6.05547e-36	8.91814e-35	70.6786
PEG3	-2.83605	0.0322092	-13.7564	6.11368e-36	8.9974e-35	70.6691
CYP4B1	-2.85345	-5.47723	-13.7485	6.59371e-36	9.69691e-35	70.5939
SESN2	-1.18784	0.773572	-13.7432	6.93573e-36	1.01853e-34	70.5436
LIPC	-3.2298	-2.99079	-13.7366	7.39045e-36	1.08221e-34	70.4805
MYLK	-3.00695	2.38786	-13.733	7.65209e-36	1.11893e-34	70.4459
SIGLEC6	-2.59594	-3.44226	-13.7295	7.9117e-36	1.15524e-34	70.4127
ASB5	-3.62566	-7.98257	-13.7283	8.0037e-36	1.16785e-34	70.4012
LPP	-1.57799	2.0788	-13.7232	8.402e-36	1.22509e-34	70.3529
PDE9A	-2.86746	-1.76866	-13.72	8.66412e-36	1.26152e-34	70.3223
MPPED1	-1.08225	-4.42474	-13.7135	9.22276e-36	1.33811e-34	70.2602
PAPSS2	-2.18998	1.32456	-13.7115	9.40033e-36	1.36292e-34	70.2412
GRIA1	-2.1753	-0.687113	-13.7077	9.75313e-36	1.41307e-34	70.2046
PRKCB	-3.05616	-3.29	-13.7013	1.03663e-35	1.49768e-34	70.144
CLMN	-1.35087	3.90248	-13.6893	1.1632e-35	1.67582e-34	70.0294
C8orf46	-2.03643	-7.10076	-13.6865	1.19549e-35	1.71872e-34	70.0022
SYNPO	-1.67225	0.794433	-13.6795	1.27754e-35	1.83028e-34	69.9361
GFRA1	-3.6869	-3.81429	-13.6766	1.31343e-35	1.87907e-34	69.9086
LGI4	-2.71823	4.71339	-13.6546	1.62242e-35	2.31146e-34	69.6985
DHRS9	-4.95233	4.30017	-13.6539	1.63302e-35	2.32496e-34	69.692
PGM5P2	-2.37851	-6.08168	-13.6363	1.93215e-35	2.74892e-34	69.5247
TRIM40	-3.20664	3.13137	-13.6332	1.98997e-35	2.82728e-34	69.4954
KIAA1161	-1.35698	-0.241396	-13.6238	2.17838e-35	3.08854e-34	69.4054
GAP43	-3.58994	-4.74431	-13.6168	2.32909e-35	3.2954e-34	69.3389
CHP2	-5.5233	-1.98758	-13.6109	2.46333e-35	3.47575e-34	69.2832
C14orf139	-1.97055	-4.00757	-13.6026	2.66654e-35	3.75401e-34	69.2044
CD36	-3.35347	5.45165	-13.6026	2.66785e-35	3.75401e-34	69.2039
TMEM179	-1.18754	-8.49126	-13.6002	2.72925e-35	3.83515e-34	69.1813
CLDN7	-1.22835	5.35865	-13.595	2.86906e-35	4.02335e-34	69.1316
PLS1	-1.3535	10.169	-13.592	2.95129e-35	4.13584e-34	69.1035
ARRB1	-1.20911	-0.00263209	-13.581	3.28002e-35	4.59338e-34	68.9985
DKFZp779M0652	-1.47033	-6.32153	-13.5765	3.42226e-35	4.78929e-34	68.9562
G6PC	-2.37167	-2.89005	-13.5716	3.58626e-35	5.01197e-34	68.9097
MAGI3	-1.08663	6.03943	-13.5702	3.63421e-35	5.07553e-34	68.8965
SLC22A23	-1.56437	5.26732	-13.5637	3.87006e-35	5.39758e-34	68.834
BTNL8	-4.16861	0.956881	-13.5628	3.90383e-35	5.44099e-34	68.8253
SLC26A3	-6.96179	1.68539	-13.5553	4.19376e-35	5.83318e-34	68.7541
DIRAS2	-2.36851	0.575174	-13.5541	4.23918e-35	5.89237e-34	68.7434
SCN3A	-2.59901	-1.48872	-13.5469	4.54058e-35	6.30277e-34	68.6751
CGRRF1	-1.15127	4.62141	-13.5395	4.87196e-35	6.73998e-34	68.605
ACAA1	-1.01664	0.874659	-13.539	4.89875e-35	6.77249e-34	68.5996
FOLR2	-3.22871	0.685073	-13.5272	5.47897e-35	7.56444e-34	68.4882
DISP2	-2.32309	2.50996	-13.5159	6.10438e-35	8.41658e-34	68.3808
GRIK5	-3.20204	-2.44704	-13.5046	6.79661e-35	9.35217e-34	68.274
PDZRN4	-4.05224	-4.91458	-13.5017	6.98851e-35	9.60978e-34	68.2463
C5orf30	-1.36564	-0.562595	-13.5008	7.04991e-35	9.68772e-34	68.2376
HBB	-3.59892	0.380436	-13.4975	7.2771e-35	9.99323e-34	68.206
CFL2	-2.11241	5.39986	-13.4956	7.40632e-35	1.01639e-33	68.1885
PLSCR4	-1.6262	-0.64595	-13.4759	8.93748e-35	1.22324e-33	68.0017
PLAC8	-3.94918	0.254085	-13.4716	9.3087e-35	1.27235e-33	67.9612
TCN2	-1.90107	4.04525	-13.4681	9.63028e-35	1.31543e-33	67.9274
CAPN5	-1.51658	9.02575	-13.4657	9.84713e-35	1.34327e-33	67.9053
CHST8	-1.86053	-5.304	-13.4613	1.02712e-34	1.39925e-33	67.8634
TUBB4	-1.48265	-2.30643	-13.4603	1.03683e-34	1.41155e-33	67.854
CA14	-2.14376	-0.185738	-13.4572	1.0677e-34	1.45261e-33	67.8248
C6orf105	-4.42504	-1.41463	-13.4476	1.16985e-34	1.58319e-33	67.734
PTP4A1	-1.10905	1.23685	-13.4476	1.17062e-34	1.58319e-33	67.7333
CEACAM7	-5.74706	1.39941	-13.4428	1.22496e-34	1.6545e-33	67.6882
CCNDBP1	-1.00011	1.77037	-13.4393	1.2667e-34	1.70863e-33	67.6549
NTRK3	-2.65996	-4.88971	-13.4325	1.35063e-34	1.81945e-33	67.5911
GALNT12	-1.54035	4.86276	-13.4157	1.58523e-34	2.13269e-33	67.4318
TRIM3	-1.00895	2.52158	-13.4125	1.63408e-34	2.19409e-33	67.4017
MAOA	-2.34893	3.43315	-13.411	1.65781e-34	2.2245e-33	67.3873
LRMP	-3.16938	-1.20302	-13.4075	1.71395e-34	2.29832e-33	67.3542
TMEM90A	-1.89275	-7.16545	-13.4049	1.75649e-34	2.35076e-33	67.3298
PDE5A	-2.00795	1.31063	-13.3988	1.86165e-34	2.48827e-33	67.272
CFP	-2.37995	-4.43012	-13.3969	1.89539e-34	2.53171e-33	67.2542
TNFSF10	-1.42346	0.797049	-13.3781	2.26697e-34	3.0143e-33	67.0762
C10orf105	-2.01157	-7.71517	-13.3746	2.34378e-34	3.11442e-33	67.043
SLC35F1	-2.2683	-6.38185	-13.369	2.4709e-34	3.27909e-33	66.9905
TMEM54	-1.47244	6.92084	-13.3586	2.72828e-34	3.61832e-33	66.892
CHL1	-3.3146	3.8596	-13.357	2.76917e-34	3.67018e-33	66.8772
SCGB2A1	-3.62145	2.08647	-13.3495	2.97453e-34	3.93982e-33	66.8061
RNASEL	-1.26932	2.43592	-13.348	3.01585e-34	3.99196e-33	66.7924
SIDT2	-1.07775	7.4662	-13.3448	3.10737e-34	4.11046e-33	66.7626
SLC41A2	-1.71097	4.23059	-13.3396	3.26602e-34	4.31754e-33	66.7131
SEMA6A	-2.90967	-2.78594	-13.3327	3.4884e-34	4.59967e-33	66.6476
ADRB2	-2.43025	-4.18219	-13.3319	3.51407e-34	4.63054e-33	66.6403
CNTN3	-3.77032	2.75206	-13.3273	3.67102e-34	4.83426e-33	66.5969
MYH11	-4.52541	3.50747	-13.3265	3.6989e-34	4.86785e-33	66.5894
SNCG	-2.51782	-4.47306	-13.3256	3.72935e-34	4.90477e-33	66.5812
RCAN1	-1.28636	2.55585	-13.3246	3.76659e-34	4.95059e-33	66.5713
KIF5A	-3.29831	-1.97644	-13.3223	3.84954e-34	5.05637e-33	66.5497
HRCT1	-2.65739	-4.24248	-13.3189	3.97392e-34	5.21307e-33	66.5181
AMN	-2.67852	0.186056	-13.3097	4.33645e-34	5.68502e-33	66.4313
SYNM	-4.09501	6.42036	-13.2948	4.99331e-34	6.53363e-33	66.291
STAP1	-2.86179	1.76363	-13.2809	5.69956e-34	7.453e-33	66.1595
C8orf80	-3.11714	-2.06086	-13.2806	5.71182e-34	7.46426e-33	66.1574
PTGDR	-3.88356	-3.6908	-13.2723	6.17786e-34	8.04258e-33	66.0794
CASQ2	-4.9386	-3.00474	-13.2692	6.364e-34	8.27965e-33	66.0499
TACR2	-3.64119	-0.251987	-13.2667	6.51981e-34	8.477e-33	66.0258
FMO5	-2.30128	4.59842	-13.2529	7.42464e-34	9.63514e-33	65.8966
ZNF676	-1.66114	-6.3407	-13.2526	7.4474e-34	9.65857e-33	65.8936
LGR4	-1.28432	0.623024	-13.2509	7.56614e-34	9.80636e-33	65.8779
GRIA2	-1.27994	-0.19707	-13.2498	7.64874e-34	9.90092e-33	65.8671
F2RL1	-1.28527	-0.474928	-13.2403	8.36629e-34	1.08229e-32	65.7779
LOC283856	-1.50236	-3.09903	-13.2236	9.79539e-34	1.26478e-32	65.6211
ZNF132	-1.37464	0.189575	-13.2203	1.01056e-33	1.30402e-32	65.5901
HLF	-2.38431	-5.40613	-13.2121	1.09193e-33	1.40813e-32	65.5131
LUZP2	-2.85656	-5.34337	-13.2085	1.13018e-33	1.45562e-32	65.4789
SCUBE1	-2.8595	-0.137053	-13.2039	1.18061e-33	1.51867e-32	65.4355
FAM46C	-2.44112	-1.55938	-13.1951	1.28208e-33	1.6461e-32	65.3535
TP53I3	-1.20346	-1.63016	-13.1936	1.3004e-33	1.66858e-32	65.3394
FAM70A	-2.82491	-4.77455	-13.1792	1.49015e-33	1.90728e-32	65.204
ABHD6	-1.0445	-1.52655	-13.1784	1.50103e-33	1.92001e-32	65.1968
TUBAL3	-3.1581	0.211438	-13.1663	1.68306e-33	2.1475e-32	65.083
RICH2	-2.59348	-0.152588	-13.159	1.80315e-33	2.29645e-32	65.0145
PRRT1	-1.72808	3.07952	-13.1532	1.9043e-33	2.42076e-32	64.9602
S100B	-2.71002	3.82946	-13.1523	1.92165e-33	2.4413e-32	64.9512
SLC6A15	-2.60391	-1.6374	-13.1469	2.02127e-33	2.56627e-32	64.901
ADRB3	-2.16049	-0.955456	-13.1466	2.02678e-33	2.57168e-32	64.8982
STK17B	-1.15625	7.79863	-13.1448	2.06266e-33	2.61559e-32	64.8808
PLCD3	-1.65605	2.36278	-13.1422	2.11354e-33	2.67845e-32	64.8566
GPR142	-1.2915	-4.46109	-13.1397	2.16322e-33	2.73804e-32	64.8335
SCUBE2	-3.04686	-4.08591	-13.138	2.19837e-33	2.78081e-32	64.8175
ZNF835	-2.04439	-6.53164	-13.1344	2.2741e-33	2.87162e-32	64.7838
NEU4	-3.24335	2.8273	-13.1324	2.3175e-33	2.92429e-32	64.765
TCEAL2	-3.76202	-6.03937	-13.1312	2.34318e-33	2.95489e-32	64.754
SIGLEC11	-2.23319	0.838126	-13.1218	2.56205e-33	3.22692e-32	64.6653
MARCKS	-1.05928	2.06177	-13.1213	2.57269e-33	3.23834e-32	64.6611
LOC100128164	-1.3445	-7.74912	-13.1034	3.04491e-33	3.81637e-32	64.4936
RPL10L	-2.58366	-1.13955	-13.0965	3.25104e-33	4.06478e-32	64.4285
CORO2B	-2.70309	2.24461	-13.094	3.32715e-33	4.15742e-32	64.4055
MT1E	-3.54235	0.0321471	-13.0928	3.36637e-33	4.20387e-32	64.3938
SLCO2A1	-2.26189	6.92797	-13.0889	3.49043e-33	4.35614e-32	64.3579
HMX2	-1.94369	0.684595	-13.0853	3.61032e-33	4.50302e-32	64.3243
JAM2	-2.89546	-2.965	-13.0838	3.66244e-33	4.5625e-32	64.3101
HHLA2	-3.33133	8.22884	-13.0789	3.83569e-33	4.77252e-32	64.2641
VAT1L	-2.43784	-4.88266	-13.0515	4.966e-33	6.14909e-32	64.0074
LMOD1	-3.4753	7.04391	-13.0514	4.96924e-33	6.1494e-32	64.0067
NEURL1B	-1.50179	1.39565	-13.0502	5.02324e-33	6.21248e-32	63.996
SYNPO2	-3.73971	3.7592	-13.0487	5.09841e-33	6.30164e-32	63.9812
CD209	-3.05054	5.35503	-13.0442	5.31783e-33	6.56494e-32	63.9393
FNBP1	-1.83482	3.17682	-13.0397	5.54686e-33	6.84357e-32	63.8974
PPP1R12B	-2.30767	1.55722	-13.0349	5.80383e-33	7.15631e-32	63.8524
EFCAB1	-1.47864	0.303153	-13.0257	6.32434e-33	7.77943e-32	63.767
SYN2	-2.91305	-6.67644	-13.0214	6.584e-33	8.08913e-32	63.727
SLC2A4	-2.46544	0.506436	-13.0191	6.73262e-33	8.26679e-32	63.7048
RAVER2	-1.12433	1.13437	-13.0118	7.20584e-33	8.84256e-32	63.6373
KCNAB1	-1.7047	-3.41065	-12.9953	8.41351e-33	1.02999e-31	63.4833
CNTNAP3	-2.81698	-6.62793	-12.9892	8.91028e-33	1.08886e-31	63.4263
SLC18A3	-2.30532	-9.2095	-12.9775	9.94726e-33	1.21269e-31	63.3168
KIAA1211	-2.13163	0.811413	-12.9764	1.00469e-32	1.22411e-31	63.3069
AQP4	-1.75603	-8.86273	-12.9761	1.00789e-32	1.22728e-31	63.3038
TDRD10	-1.74216	-6.61821	-12.9741	1.02646e-32	1.24842e-31	63.2856
TMEM30B	-1.11489	1.19942	-12.973	1.03776e-32	1.26049e-31	63.2747
FRMD3	-2.95915	-2.30223	-12.9717	1.0506e-32	1.27475e-31	63.2625
UGT1A5	-1.58606	-8.08647	-12.9709	1.05855e-32	1.28364e-31	63.255
CHGB	-4.30026	-0.733328	-12.9687	1.07982e-32	1.30789e-31	63.2352
PAQR5	-2.20324	7.11456	-12.964	1.12887e-32	1.36569e-31	63.1911
PRKACB	-2.25158	5.05122	-12.9598	1.17399e-32	1.41944e-31	63.1521
IGSF10	-3.14945	1.31702	-12.9453	1.34507e-32	1.62246e-31	63.0169
LOC100130933	-1.94617	3.14868	-12.9436	1.36623e-32	1.64702e-31	63.0014
HIST1H1C	-1.95752	-0.437915	-12.931	1.53728e-32	1.84456e-31	62.8841
C7orf10	-2.47168	3.76208	-12.9308	1.54033e-32	1.84713e-31	62.8822
GLTPD1	-1.04142	5.31353	-12.9235	1.65036e-32	1.97677e-31	62.8136
RASD2	-2.51331	4.05741	-12.918	1.73731e-32	2.07964e-31	62.7626
SNAP25	-3.21365	-6.5585	-12.9173	1.7477e-32	2.08971e-31	62.7566
TAS1R1	-1.77538	0.186247	-12.9108	1.85884e-32	2.21872e-31	62.6954
NECAB1	-2.51044	-5.59499	-12.9002	2.05146e-32	2.44456e-31	62.5974
SHOX	-1.88337	-6.93617	-12.8978	2.09869e-32	2.49873e-31	62.5747
ABP1	-2.07088	6.72563	-12.8977	2.10071e-32	2.49873e-31	62.5738
PAMR1	-2.04136	-1.52434	-12.8977	2.10074e-32	2.49873e-31	62.5738
ATRNL1	-2.87255	0.637771	-12.8927	2.20047e-32	2.61585e-31	62.5277
UGT2A3	-5.23999	-0.349499	-12.8853	2.35882e-32	2.79599e-31	62.4586
TTLL6	-2.78201	-4.05478	-12.8846	2.37337e-32	2.81161e-31	62.4525
HTR3A	-2.92829	-7.33623	-12.8786	2.50992e-32	2.97166e-31	62.3969
POLD4	-1.00762	3.78615	-12.8751	2.59483e-32	3.06865e-31	62.3638
ARHGEF37	-1.68693	0.292882	-12.8748	2.60253e-32	3.07599e-31	62.3609
SEZ6L	-2.22661	-8.00495	-12.8684	2.76128e-32	3.25987e-31	62.302
HSPB8	-3.22805	-0.854188	-12.8681	2.77016e-32	3.26847e-31	62.2988
EYA2	-3.81068	-1.94699	-12.8666	2.80879e-32	3.30835e-31	62.2851
RPS6KA5	-1.42228	-1.59375	-12.8637	2.88705e-32	3.3908e-31	62.2578
LGALS2	-3.83392	5.31802	-12.8574	3.06212e-32	3.59025e-31	62.1992
KIF5C	-2.49862	-4.9985	-12.8568	3.07984e-32	3.60896e-31	62.1935
C9orf7	-1.07573	0.888505	-12.8546	3.142e-32	3.6797e-31	62.1736
CLCNKB	-1.91507	-1.72525	-12.8532	3.18357e-32	3.72593e-31	62.1606
MGAT4A	-1.20852	2.29808	-12.8532	3.1851e-32	3.72593e-31	62.1601
KCNC1	-1.72885	-7.74751	-12.8528	3.19507e-32	3.73547e-31	62.157
LCN10	-2.39917	-2.00974	-12.8477	3.3513e-32	3.91366e-31	62.1095
ADAMTSL1	-2.54421	-1.26841	-12.8415	3.55189e-32	4.14556e-31	62.0518
HCFC2	-1.24553	-1.85902	-12.8378	3.67672e-32	4.28638e-31	62.0174
VPREB3	-2.80943	-1.79495	-12.8371	3.69974e-32	4.31077e-31	62.0112
ACADM	-1.29097	4.76726	-12.8343	3.79981e-32	4.42485e-31	61.9847
DIRC2	-1.00262	-0.526376	-12.8308	3.92292e-32	4.56045e-31	61.953
HS6ST3	-2.28749	-5.27797	-12.819	4.38003e-32	5.08896e-31	61.8435
PTCHD1	-3.24146	-8.4923	-12.8129	4.6377e-32	5.38225e-31	61.7867
RELN	-3.69381	-1.3186	-12.8117	4.68987e-32	5.43972e-31	61.7755
NTNG1	-2.59142	-6.73199	-12.8051	4.98933e-32	5.78053e-31	61.714
C7orf31	-1.69033	5.5082	-12.8025	5.11214e-32	5.91947e-31	61.6899
PRSS36	-1.51968	3.04304	-12.8004	5.21185e-32	6.02473e-31	61.6707
KLF9	-1.86854	3.21325	-12.7962	5.41697e-32	6.25833e-31	61.6323
AKAP9	-1.05026	-1.63436	-12.7948	5.48995e-32	6.33907e-31	61.619
LRRC19	-3.41536	-1.22141	-12.7884	5.82778e-32	6.71782e-31	61.5596
SULT1B1	-3.2036	3.35708	-12.7697	6.93669e-32	7.97816e-31	61.3865
KCNA1	-2.35346	-5.81059	-12.7679	7.05379e-32	8.10831e-31	61.3699
SCIN	-3.10154	-4.16883	-12.7632	7.36729e-32	8.44503e-31	61.3267
BTBD3	-1.19128	0.320135	-12.7626	7.41106e-32	8.49046e-31	61.3208
GYPC	-2.05192	-2.56528	-12.7537	8.05173e-32	9.21416e-31	61.2384
JPH3	-2.25643	-1.61966	-12.7466	8.60588e-32	9.84282e-31	61.1722
SVOP	-2.44779	-7.20298	-12.7398	9.16102e-32	1.04661e-30	61.1101
GDNF	-1.6935	-3.24275	-12.739	9.2322e-32	1.05415e-30	61.1024
STYK1	-1.89909	6.46014	-12.7333	9.73436e-32	1.11026e-30	61.0498
C8orf85	-2.01112	-1.92937	-12.7328	9.7767e-32	1.11447e-30	61.0455
MOCS1	-1.85448	1.12824	-12.7297	1.00675e-31	1.14508e-30	61.0163
COL4A6	-3.10027	-7.82499	-12.7292	1.01106e-31	1.14934e-30	61.0121
CAMK2A	-1.98856	-6.91671	-12.7281	1.02221e-31	1.16137e-30	61.0012
TMOD1	-1.98668	2.04731	-12.7155	1.14916e-31	1.30174e-30	60.8849
PGM5	-3.75449	-2.43292	-12.7146	1.15835e-31	1.31097e-30	60.8769
KIAA1239	-2.67022	-5.73022	-12.7121	1.18617e-31	1.34097e-30	60.8534
LRAT	-2.42788	0.468122	-12.7113	1.19428e-31	1.3494e-30	60.8466
ERBB4	-1.54341	-0.206579	-12.7103	1.20527e-31	1.36107e-30	60.8375
SNX24	-1.55117	-2.35879	-12.6921	1.42723e-31	1.60818e-30	60.6695
CD200R1	-2.30061	-5.22316	-12.6886	1.47473e-31	1.65988e-30	60.637
ENTPD3	-3.16036	-0.21222	-12.6702	1.75052e-31	1.96598e-30	60.4666
TLL1	-2.84206	-3.90893	-12.6682	1.78217e-31	2.00043e-30	60.4488
ADAMTSL3	-3.49771	-1.84706	-12.6643	1.84834e-31	2.07244e-30	60.4126
CAPN2	-1.19497	2.6801	-12.6553	2.01031e-31	2.25159e-30	60.3291
PROKR1	-1.08227	-2.05112	-12.6445	2.22076e-31	2.48323e-30	60.2302
GPR27	-1.6804	-6.44425	-12.6424	2.26457e-31	2.52947e-30	60.2107
MCF2L2	-1.24634	1.26033	-12.6415	2.28419e-31	2.55e-30	60.2022
TLX2	-1.84613	-7.69952	-12.6313	2.51044e-31	2.79801e-30	60.1083
PDLIM2	-1.36279	0.945108	-12.6287	2.57139e-31	2.86438e-30	60.0845
BCAS1	-3.02604	7.87258	-12.6196	2.79774e-31	3.10978e-30	60.0006
PGR	-2.76266	3.22247	-12.6132	2.96939e-31	3.297e-30	59.9415
AKR1B10	-4.47015	2.15601	-12.611	3.0289e-31	3.35945e-30	59.9217
BMP2	-2.19391	0.0060908	-12.6064	3.16112e-31	3.50231e-30	59.8793
NR3C1	-2.09929	2.53605	-12.6005	3.33827e-31	3.69459e-30	59.8251
KY	-2.27396	-1.37296	-12.5952	3.50707e-31	3.87932e-30	59.7761
CEACAM3	-2.4048	2.34661	-12.5934	3.56542e-31	3.9375e-30	59.7597
PDE4D	-1.5007	4.69332	-12.5889	3.71812e-31	4.09732e-30	59.718
UGT1A7	-2.12707	-0.964328	-12.5872	3.77552e-31	4.15834e-30	59.7028
SSBP2	-2.23476	-1.74427	-12.5871	3.7794e-31	4.16038e-30	59.7018
GPA33	-2.25183	10.1937	-12.5752	4.22041e-31	4.62848e-30	59.5921
RGS22	-1.64352	-4.87448	-12.5638	4.68783e-31	5.1356e-30	59.4877
TPO	-2.50562	-6.5377	-12.5575	4.97123e-31	5.44027e-30	59.4294
LMO3	-4.02515	-4.33122	-12.55	5.32837e-31	5.82179e-30	59.3605
TMEM108	-1.95382	-3.80027	-12.5434	5.66502e-31	6.18632e-30	59.2996
KIRREL3	-2.51852	-7.52983	-12.5409	5.79696e-31	6.32703e-30	59.2767
KCNMA1	-3.67189	1.94821	-12.5406	5.81047e-31	6.33841e-30	59.2744
RHOU	-1.45232	7.70346	-12.5386	5.92043e-31	6.4515e-30	59.2558
SELENBP1	-2.59558	4.47203	-12.5206	6.99276e-31	7.59183e-30	59.0904
ENTPD8	-3.45312	-0.430277	-12.5107	7.65778e-31	8.29626e-30	59.0001
LPCAT3	-1.0321	8.55327	-12.5097	7.7329e-31	8.36882e-30	58.9904
LY9	-2.83815	-7.30431	-12.5095	7.74767e-31	8.38038e-30	58.9885
AGTR1	-3.69189	2.44337	-12.5077	7.87213e-31	8.51052e-30	58.9727
FNIP2	-1.21118	-1.83465	-12.4924	9.07175e-31	9.79195e-30	58.8317
PPP1R1A	-3.70048	1.40556	-12.4894	9.32122e-31	1.00507e-29	58.8048
DPEP3	-1.50719	-3.91591	-12.4892	9.33951e-31	1.00651e-29	58.8028
DIRAS1	-2.62192	-1.1332	-12.4882	9.42659e-31	1.01536e-29	58.7936
CYP11A1	-2.00523	-3.44598	-12.4764	1.05061e-30	1.12926e-29	58.6859
SCNN1G	-3.95871	-7.17088	-12.4696	1.11917e-30	1.19982e-29	58.6231
MBOAT1	-1.22965	-0.291706	-12.462	1.20033e-30	1.28548e-29	58.5535
GCNT4	-2.47419	-3.80298	-12.4576	1.24932e-30	1.33725e-29	58.5138
SOCS6	-1.02799	1.52866	-12.4548	1.28195e-30	1.37075e-29	58.4882
LTBP4	-1.66914	6.66512	-12.4473	1.37386e-30	1.46597e-29	58.4194
APOBEC3A	-2.28899	-4.11543	-12.4365	1.51813e-30	1.61571e-29	58.3202
ASXL3	-2.99042	2.46817	-12.4272	1.65365e-30	1.75449e-29	58.2352
PRKAR2B	-2.52058	4.06386	-12.427	1.65644e-30	1.75654e-29	58.2335
LGALS9C	-2.72656	0.984708	-12.4183	1.79537e-30	1.90093e-29	58.1535
PCDH11Y	-1.2396	-7.46112	-12.4181	1.79839e-30	1.90314e-29	58.1518
BTNL3	-3.56347	2.26315	-12.4176	1.80578e-30	1.90998e-29	58.1478
ADORA3	-2.36374	2.70251	-12.4143	1.86119e-30	1.96555e-29	58.1177
BLK	-3.44492	-7.25832	-12.4064	2.00203e-30	2.11102e-29	58.0453
LARGE	-1.32593	7.19881	-12.3972	2.17857e-30	2.29364e-29	57.9613
SLC10A4	-2.10582	0.943465	-12.3925	2.27481e-30	2.39374e-29	57.9183
KIAA1409	-1.49131	-7.65492	-12.3891	2.34783e-30	2.46805e-29	57.887
BMP5	-3.53172	-4.91142	-12.3871	2.39152e-30	2.51269e-29	57.8686
KCNMB2	-1.92935	-6.23301	-12.3846	2.44672e-30	2.56937e-29	57.846
ZNF229	-2.19276	-6.15638	-12.3743	2.68975e-30	2.82313e-29	57.7519
FAM13B	-1.01671	5.78032	-12.3656	2.91327e-30	3.0515e-29	57.6726
HSPB6	-3.86855	-0.370085	-12.3603	3.05724e-30	3.19904e-29	57.6247
TCEAL7	-2.20065	-4.20386	-12.3599	3.06928e-30	3.20837e-29	57.6207
MFSD4	-2.5888	-0.74644	-12.3532	3.26361e-30	3.4063e-29	57.5598
SH3GL2	-2.6278	-5.51083	-12.352	3.29882e-30	3.4413e-29	57.5491
CHRM4	-2.08443	0.973921	-12.3486	3.40387e-30	3.54548e-29	57.518
SLC25A42	-1.15339	5.39163	-12.3471	3.45029e-30	3.59201e-29	57.5045
MPEG1	-2.53624	3.58398	-12.3452	3.51089e-30	3.64955e-29	57.4872
ARL4D	-2.0037	1.37665	-12.3446	3.53231e-30	3.6681e-29	57.4812
RNF150	-3.17486	-2.04051	-12.3425	3.60041e-30	3.73504e-29	57.4622
GSTA1	-3.89887	2.90617	-12.3352	3.84947e-30	3.98335e-29	57.3957
HADH	-1.04052	0.175367	-12.3324	3.94986e-30	4.08517e-29	57.3702
PCP4L1	-3.04281	-8.65207	-12.3298	4.04571e-30	4.17799e-29	57.3463
UGT1A1	-4.09825	-6.6959	-12.3268	4.15881e-30	4.29047e-29	57.3189
PTX3	-2.23625	1.93884	-12.3246	4.24311e-30	4.37524e-29	57.299
PANK3	-1.11649	0.702654	-12.3164	4.57377e-30	4.71147e-29	57.2245
EPB41L4B	-1.33574	4.93451	-12.3094	4.87446e-30	5.01115e-29	57.1612
SIGLEC8	-2.81825	-7.07202	-12.3065	5.00771e-30	5.14556e-29	57.1344
PTK2B	-1.2563	5.39799	-12.2941	5.60878e-30	5.74306e-29	57.0218
CAV1	-1.96145	7.5781	-12.2935	5.63933e-30	5.77146e-29	57.0164
KCNIP1	-1.58083	-4.85504	-12.291	5.77402e-30	5.90636e-29	56.993
NAALAD2	-1.5863	-4.63073	-12.2876	5.95236e-30	6.08576e-29	56.9627
MOGAT2	-3.98566	-1.67953	-12.2834	6.18482e-30	6.32028e-29	56.9247
ITGA8	-2.93357	0.333253	-12.2777	6.51791e-30	6.65735e-29	56.8726
RHOC	-1.02156	9.79564	-12.2661	7.24931e-30	7.38602e-29	56.7669
SEMA3D	-3.35849	-0.530517	-12.2629	7.46173e-30	7.59491e-29	56.7382
KANK2	-1.58732	6.32942	-12.2562	7.93195e-30	8.06552e-29	56.6775
LYNX1	-2.6087	-2.33192	-12.2534	8.14175e-30	8.26842e-29	56.6516
PSD	-3.54011	-4.32896	-12.2522	8.23426e-30	8.35637e-29	56.6404
OPN3	-1.39268	-1.96123	-12.252	8.24291e-30	8.36102e-29	56.6393
PLA2G10	-2.42345	-0.914529	-12.2495	8.43534e-30	8.54776e-29	56.6164
IMPA2	-1.23025	1.5169	-12.2417	9.06363e-30	9.16181e-29	56.545
CA12	-2.63712	3.71076	-12.2353	9.60976e-30	9.69476e-29	56.4869
GDF1	-1.62772	-6.37233	-12.2293	1.01495e-29	1.02142e-28	56.4326
PAQR8	-1.5715	2.90536	-12.2277	1.02978e-29	1.03583e-28	56.4182
FLT3	-2.359	1.56928	-12.2224	1.08024e-29	1.08606e-28	56.3707
ZFYVE28	-1.5003	-1.75002	-12.216	1.14535e-29	1.14983e-28	56.3126
NAT1	-1.64295	-0.862003	-12.2135	1.17167e-29	1.17567e-28	56.29
RSPO1	-2.33846	1.51464	-12.212	1.18865e-29	1.19213e-28	56.2757
TCF7L1	-1.46734	-0.117873	-12.2116	1.19266e-29	1.19557e-28	56.2724
SETBP1	-2.27912	-2.86917	-12.2079	1.23412e-29	1.23532e-28	56.2384
KIAA1644	-3.03593	1.12103	-12.2044	1.27386e-29	1.27448e-28	56.2069
NDN	-2.09759	0.492235	-12.1974	1.35708e-29	1.35576e-28	56.1441
SYT5	-2.35519	-3.9616	-12.195	1.38774e-29	1.38504e-28	56.1219
HAND2	-3.92412	4.28374	-12.193	1.41347e-29	1.41003e-28	56.1036
CTXN2	-1.18405	-5.27724	-12.192	1.4266e-29	1.42244e-28	56.0944
DAAM2	-2.08229	0.0264651	-12.1845	1.52717e-29	1.51756e-28	56.0268
ABCD2	-2.30271	-0.725394	-12.1817	1.56609e-29	1.55323e-28	56.0018
NRG3	-1.43276	0.292076	-12.1807	1.5806e-29	1.56686e-28	55.9926
PDK2	-1.10772	8.01616	-12.1753	1.66145e-29	1.64384e-28	55.9431
C1QL1	-2.01159	-8.72553	-12.174	1.68068e-29	1.66206e-28	55.9316
IRF4	-3.08051	-0.232847	-12.1728	1.69844e-29	1.67882e-28	55.9212
LRRC4B	-1.72264	-6.12598	-12.1713	1.7229e-29	1.70218e-28	55.907
PCK1	-3.51862	7.7636	-12.1694	1.75245e-29	1.72902e-28	55.8901
POU3F3	-1.48351	-7.09098	-12.1694	1.75261e-29	1.72902e-28	55.89
MYOCD	-3.25776	-0.502448	-12.1685	1.76739e-29	1.74277e-28	55.8817
GRIN3A	-1.74025	-2.75326	-12.1588	1.93039e-29	1.89803e-28	55.794
GHR	-2.85696	4.15898	-12.1548	2.0018e-29	1.96636e-28	55.758
GPR88	-1.87014	-4.67095	-12.1465	2.15793e-29	2.1177e-28	55.6834
BCL2	-1.90871	4.20113	-12.1462	2.16563e-29	2.12424e-28	55.6798
ZNF671	-1.94045	-4.06393	-12.146	2.1688e-29	2.12634e-28	55.6784
NPAS4	-1.78508	-1.05859	-12.1432	2.22448e-29	2.17988e-28	55.6532
SHE	-2.03695	0.818953	-12.14	2.28986e-29	2.24289e-28	55.6244
KCNA3	-2.81783	-2.68837	-12.1389	2.31259e-29	2.26406e-28	55.6146
CCL28	-2.73374	-0.323235	-12.1249	2.6283e-29	2.56459e-28	55.4875
KRT222	-1.07494	-0.863817	-12.1205	2.73592e-29	2.66834e-28	55.4476
RCSD1	-1.97768	0.783584	-12.1175	2.81151e-29	2.73816e-28	55.4206
FBXL22	-1.87932	1.54003	-12.1169	2.82613e-29	2.75109e-28	55.4154
PCDH9	-2.45437	-2.28935	-12.1145	2.88811e-29	2.8061e-28	55.3939
KRT1	-2.51283	-5.9254	-12.1118	2.95893e-29	2.86948e-28	55.3698
TMPRSS2	-1.41618	3.99861	-12.11	3.00807e-29	2.91438e-28	55.3534
ANKRD53	-1.78372	-5.86963	-12.1053	3.13995e-29	3.03785e-28	55.3108
C4orf39	-1.91109	-3.12838	-12.1047	3.15732e-29	3.05322e-28	55.3053
SH3BGR	-1.72973	-4.61027	-12.0971	3.3844e-29	3.26819e-28	55.2364
C7orf58	-2.58394	-3.03358	-12.0838	3.8183e-29	3.67337e-28	55.1165
HIF3A	-2.78011	-0.953832	-12.0771	4.05916e-29	3.90143e-28	55.0558
EDIL3	-2.64237	5.7863	-12.0735	4.19157e-29	4.02681e-28	55.0239
SLIT3	-2.83731	0.734705	-12.07	4.32704e-29	4.15113e-28	54.9923
FOXN3	-1.16484	8.31628	-12.068	4.40724e-29	4.22412e-28	54.9741
SGCA	-3.4065	-6.10038	-12.0659	4.49231e-29	4.30364e-28	54.9551
FCRLA	-3.3055	-4.8718	-12.0631	4.60777e-29	4.4122e-28	54.9299
HMOX1	-1.72558	3.65892	-12.0517	5.11054e-29	4.88452e-28	54.827
CLECL1	-2.02461	-5.1202	-12.0503	5.17378e-29	4.94266e-28	54.8148
KCNQ5	-2.50134	-3.63058	-12.0412	5.61837e-29	5.36239e-28	54.7329
RND2	-2.32084	-5.80427	-12.0408	5.64101e-29	5.379e-28	54.7289
FAM161B	-1.53368	3.30921	-12.0298	6.22864e-29	5.92557e-28	54.6305
SHISA3	-3.16895	-0.0361799	-12.0297	6.23769e-29	5.93144e-28	54.6291
B3GNT8	-1.63909	3.16243	-12.0248	6.51872e-29	6.19007e-28	54.5853
HSPB3	-3.12945	-7.36012	-12.0236	6.59013e-29	6.25498e-28	54.5745
LRRN4CL	-2.18933	-3.34749	-12.0231	6.62241e-29	6.28272e-28	54.5696
C1orf95	-3.73229	0.364604	-12.0186	6.89827e-29	6.53839e-28	54.5291
DAND5	-1.94004	-6.3662	-11.9991	8.22916e-29	7.77115e-28	54.3539
EPAS1	-1.20032	0.78424	-11.9921	8.76409e-29	8.26869e-28	54.2914
NAP1L6	-1.5444	-8.76609	-11.9816	9.63956e-29	9.07383e-28	54.1968
SH2D1B	-2.11227	-2.21616	-11.9758	1.01624e-28	9.55723e-28	54.1443
ATP2A3	-2.11275	2.98346	-11.9755	1.01892e-28	9.57801e-28	54.1417
IMPA1	-1.08002	7.42044	-11.9752	1.02158e-28	9.59864e-28	54.1391
HPCA	-1.87205	-2.00838	-11.975	1.02366e-28	9.61374e-28	54.1371
TRIM9	-2.67748	-2.89298	-11.9707	1.06375e-28	9.98112e-28	54.099
REP15	-3.49399	-3.46878	-11.9666	1.10372e-28	1.03373e-27	54.0623
HSPA2	-2.1645	3.62977	-11.9585	1.188e-28	1.11115e-27	53.9893
SYNGR1	-2.60525	-2.21865	-11.9538	1.2398e-28	1.15854e-27	53.9469
LIMS2	-2.23948	-1.48574	-11.9518	1.26174e-28	1.1785e-27	53.9295
FLJ11235	-1.69918	-3.37548	-11.9476	1.31121e-28	1.22415e-27	53.8913
C8G	-2.85917	-2.42829	-11.9431	1.36509e-28	1.2733e-27	53.8513
KCNMB1	-3.0594	-5.18077	-11.9423	1.37523e-28	1.28159e-27	53.8439
TSHZ1	-1.15461	5.19016	-11.935	1.46857e-28	1.36796e-27	53.7787
RBP5	-2.17197	2.63926	-11.9314	1.5171e-28	1.41188e-27	53.7464
CLU	-2.72431	0.875466	-11.9233	1.63253e-28	1.51724e-27	53.6736
SVIL	-1.51771	8.89814	-11.9205	1.67386e-28	1.55495e-27	53.6488
PECI	-1.56216	5.55836	-11.9204	1.67518e-28	1.55547e-27	53.648
CYSLTR1	-2.23569	-6.01882	-11.9124	1.80153e-28	1.66977e-27	53.5758
SOX15	-1.73683	-2.67073	-11.9106	1.83091e-28	1.69547e-27	53.5597
VILL	-1.80104	-0.501152	-11.9105	1.83203e-28	1.69575e-27	53.5591
CLEC4F	-1.82293	-6.83142	-11.9044	1.93632e-28	1.78663e-27	53.5041
CYP2B7P1	-2.39425	-3.92204	-11.9011	1.99455e-28	1.83789e-27	53.4747
NACAD	-2.17867	-7.07491	-11.9002	2.01061e-28	1.85185e-27	53.4667
UGT2B15	-4.72656	-0.403026	-11.8971	2.06792e-28	1.90378e-27	53.4388
SLC35A3	-1.15667	1.92237	-11.8932	2.14116e-28	1.97033e-27	53.4043
CREB3L3	-3.40194	-1.82353	-11.8915	2.17413e-28	1.99977e-27	53.3891
VIP	-4.80063	-3.05405	-11.8847	2.31228e-28	2.12114e-27	53.3279
SH3BGRL2	-1.04961	7.27984	-11.8758	2.50366e-28	2.29261e-27	53.249
SLC23A3	-2.20338	-1.40881	-11.8738	2.55072e-28	2.33361e-27	53.2305
C6orf155	-1.34802	0.505833	-11.8733	2.56246e-28	2.34331e-27	53.2259
IL16	-1.86001	-1.57066	-11.8729	2.57115e-28	2.35021e-27	53.2225
KCNA5	-2.05472	-4.25695	-11.8689	2.66631e-28	2.43394e-27	53.1865
BVES	-2.42816	-2.74969	-11.8642	2.78073e-28	2.53613e-27	53.1447
REEP2	-2.32742	-4.02903	-11.8602	2.88222e-28	2.6252e-27	53.1091
UGT1A9	-3.66192	2.66405	-11.852	3.10409e-28	2.82603e-27	53.0355
EAF2	-1.15814	2.26311	-11.8481	3.214e-28	2.9235e-27	53.0009
LGI3	-2.1865	0.433236	-11.8452	3.3e-28	3.0004e-27	52.9747
FGFR2	-2.9014	-0.400247	-11.8424	3.38376e-28	3.07247e-27	52.9498
RIMKLA	-1.69688	2.59832	-11.8341	3.64611e-28	3.30776e-27	52.8757
CNR2	-2.1939	-7.37645	-11.8336	3.66121e-28	3.31999e-27	52.8716
MICALCL	-1.57956	1.67517	-11.8251	3.95231e-28	3.57606e-27	52.7956
BDKRB1	-1.85187	3.56048	-11.8245	3.97453e-28	3.59458e-27	52.79
MPI	-1.02484	7.4974	-11.8236	4.00458e-28	3.62017e-27	52.7826
ACSF2	-1.62084	2.57501	-11.8233	4.01794e-28	3.63065e-27	52.7793
BMP6	-1.85778	-0.475257	-11.8156	4.3044e-28	3.88437e-27	52.7109
LOC25845	-2.14775	0.22297	-11.814	4.36553e-28	3.9378e-27	52.6969
ACTG2	-3.71379	6.97381	-11.8105	4.50543e-28	4.06043e-27	52.6656
TMEM140	-1.20822	-0.799178	-11.8086	4.58244e-28	4.12801e-27	52.6487
SERPINA9	-2.59266	-6.48057	-11.7967	5.10195e-28	4.57993e-27	52.5421
SVOPL	-2.85211	-7.69548	-11.7966	5.10474e-28	4.58043e-27	52.5415
XDH	-2.87217	-1.57675	-11.795	5.17632e-28	4.6406e-27	52.5277
CNN1	-3.63651	3.91659	-11.7942	5.21785e-28	4.67376e-27	52.5198
CCR2	-2.82158	-2.17173	-11.7919	5.32525e-28	4.76788e-27	52.4996
TRIM50	-1.20092	-5.80699	-11.7885	5.4897e-28	4.91297e-27	52.4694
F13A1	-3.53238	2.97078	-11.7838	5.72563e-28	5.11965e-27	52.4276
MIXL1	-1.30096	-0.71265	-11.7736	6.27508e-28	5.59633e-27	52.3366
DPP10	-4.21036	-2.8922	-11.7731	6.30143e-28	5.61738e-27	52.3324
FBXO32	-1.67747	4.86555	-11.7705	6.4536e-28	5.75053e-27	52.3087
ANKRD35	-2.18404	-2.11847	-11.7678	6.60931e-28	5.88418e-27	52.2851
CNRIP1	-1.77228	-1.97269	-11.7611	7.02094e-28	6.24252e-27	52.2251
TRHDE	-2.94509	-2.21214	-11.7507	7.70346e-28	6.83457e-27	52.133
LOC150622	-1.05563	-9.32445	-11.7411	8.39628e-28	7.4364e-27	52.0475
SLC6A9	-1.53887	-2.15071	-11.74	8.476e-28	7.50376e-27	52.0381
GPR18	-1.8911	-5.57519	-11.7394	8.52281e-28	7.54195e-27	52.0326
CDK15	-1.10963	-5.84511	-11.7356	8.81648e-28	7.79511e-27	51.999
FAM107B	-1.60244	6.09392	-11.7353	8.84464e-28	7.81664e-27	51.9958
CLCN2	-1.48263	1.92534	-11.7335	8.98768e-28	7.93963e-27	51.9799
CACNG7	-1.09786	-5.01447	-11.7333	8.99893e-28	7.94615e-27	51.9786
IL11RA	-1.46595	1.62138	-11.7302	9.25258e-28	8.1561e-27	51.951
ZIK1	-1.85711	-2.09115	-11.7278	9.45942e-28	8.33484e-27	51.9291
MS4A2	-2.87024	-4.11426	-11.726	9.61228e-28	8.4659e-27	51.9132
LOC389333	-1.33852	-4.51248	-11.7251	9.68891e-28	8.52608e-27	51.9053
TPSG1	-4.05259	4.52715	-11.7224	9.92194e-28	8.71619e-27	51.8817
PLD1	-1.24986	1.14797	-11.7212	1.00298e-27	8.80719e-27	51.871
CCDC158	-1.19244	0.677952	-11.7025	1.18534e-27	1.03907e-26	51.7051
SOCS2	-1.46818	-0.807147	-11.6876	1.35504e-27	1.18278e-26	51.5723
FABP2	-4.22992	-1.24077	-11.6856	1.37909e-27	1.20224e-26	51.5548
NKX2-2	-2.59242	-6.24843	-11.6848	1.38968e-27	1.21044e-26	51.5472
DLGAP2	-1.48553	-10.3028	-11.6691	1.59789e-27	1.38768e-26	51.4086
DCAF12L2	-1.47018	0.406441	-11.6667	1.63265e-27	1.41727e-26	51.3872
ACSS2	-1.1027	1.75338	-11.6643	1.66827e-27	1.44696e-26	51.3658
EPHX2	-1.81084	3.88056	-11.6635	1.67951e-27	1.45609e-26	51.3591
STAP2	-1.17756	0.698971	-11.6552	1.80935e-27	1.56668e-26	51.2852
HCN4	-1.46899	-5.07295	-11.6515	1.86932e-27	1.61724e-26	51.2528
TJP3	-1.31127	8.89015	-11.6506	1.88425e-27	1.62947e-26	51.2449
TPM1	-1.34201	9.81201	-11.6492	1.90943e-27	1.64985e-26	51.2318
PRRG3	-1.28986	-6.68422	-11.6451	1.97938e-27	1.70886e-26	51.196
FCRL2	-2.97862	-1.07375	-11.6443	1.99365e-27	1.72045e-26	51.1889
GOLM1	-1.32486	2.32533	-11.6413	2.04883e-27	1.76658e-26	51.1618
SCN3B	-2.3961	2.32212	-11.6367	2.13366e-27	1.83896e-26	51.1215
KIR2DL4	-2.4695	-6.37058	-11.6263	2.34044e-27	2.0138e-26	51.0297
FABP4	-4.20506	-2.20284	-11.6258	2.35152e-27	2.02248e-26	51.025
CD302	-1.21337	7.06599	-11.623	2.41165e-27	2.07246e-26	50.9999
CIDEB	-1.00551	2.99427	-11.6221	2.42978e-27	2.08717e-26	50.9925
NIPAL1	-1.52172	6.06312	-11.6178	2.52589e-27	2.16882e-26	50.954
TNNT3	-1.70354	-6.6527	-11.6177	2.52796e-27	2.16969e-26	50.9532
CTSS	-1.19261	2.0595	-11.6146	2.59718e-27	2.22724e-26	50.9264
IGSF9	-1.69669	2.04062	-11.6095	2.71835e-27	2.32824e-26	50.8811
SLC22A17	-2.10602	2.59833	-11.6065	2.79249e-27	2.39073e-26	50.8544
MST1P9	-2.8293	3.20664	-11.6024	2.8954e-27	2.47574e-26	50.8185
C12orf72	-1.04706	-3.92565	-11.5997	2.96669e-27	2.53353e-26	50.7943
FECH	-1.14327	1.78792	-11.5964	3.05491e-27	2.60454e-26	50.7652
IL1R2	-2.9983	0.146808	-11.5955	3.08072e-27	2.62545e-26	50.7569
VIPR1	-2.01271	0.977335	-11.595	3.09296e-27	2.63479e-26	50.7529
PDGFD	-1.86903	2.91237	-11.5942	3.11415e-27	2.65174e-26	50.7462
SYT15	-1.75571	-5.68298	-11.5823	3.46371e-27	2.94695e-26	50.6406
CD101	-1.53689	-3.16622	-11.5718	3.80346e-27	3.22532e-26	50.5477
TLR9	-1.97369	-1.50722	-11.5707	3.8397e-27	3.25471e-26	50.5383
CES3	-2.89474	7.15099	-11.5681	3.92799e-27	3.3268e-26	50.5157
CILP	-4.07115	1.55361	-11.5547	4.42534e-27	3.74032e-26	50.3973
ATL1	-1.4115	3.78373	-11.5518	4.54223e-27	3.83595e-26	50.3715
C17orf76	-1.28055	-0.99035	-11.5479	4.70099e-27	3.96514e-26	50.3374
SIGLECP3	-2.12865	-5.0844	-11.5432	4.90162e-27	4.13266e-26	50.2959
RAB9B	-1.88767	-3.42947	-11.5383	5.12123e-27	4.30897e-26	50.2524
GPR146	-1.38948	-2.11902	-11.5313	5.44826e-27	4.5785e-26	50.1909
SMCHD1	-1.11443	-1.13922	-11.528	5.60816e-27	4.70902e-26	50.1622
OLFM1	-2.4433	-4.6376	-11.527	5.65871e-27	4.74952e-26	50.1533
GIMAP7	-1.82667	-0.98244	-11.5233	5.84851e-27	4.90281e-26	50.1206
NLGN4X	-2.28144	-6.1332	-11.5162	6.23091e-27	5.21912e-26	50.0577
AQP11	-1.28422	-3.02945	-11.5062	6.80788e-27	5.69311e-26	49.9698
KLHL34	-2.88756	-3.82754	-11.5045	6.91046e-27	5.77184e-26	49.9549
FAM163A	-2.0651	-7.09302	-11.502	7.06234e-27	5.89629e-26	49.9334
MYL9	-2.54206	2.38232	-11.5015	7.09397e-27	5.92029e-26	49.9289
GIMAP5	-1.86973	-1.57264	-11.4969	7.38816e-27	6.1583e-26	49.8886
PHF7	-1.25838	-0.501696	-11.4941	7.57706e-27	6.31319e-26	49.8635
OSR1	-3.09041	-4.65178	-11.4921	7.71091e-27	6.42211e-26	49.8461
MAB21L2	-3.22823	1.88599	-11.4915	7.74942e-27	6.45157e-26	49.8412
WNT2B	-1.9902	1.76974	-11.4903	7.83378e-27	6.51915e-26	49.8305
SIPA1L2	-1.44008	5.70206	-11.4831	8.35343e-27	6.94315e-26	49.7667
UCN3	-3.12325	-0.82701	-11.4828	8.37627e-27	6.95651e-26	49.764
ZNF385B	-2.42777	-1.60915	-11.4826	8.38492e-27	6.96087e-26	49.763
HDAC9	-2.30195	-1.50685	-11.4793	8.6341e-27	7.16194e-26	49.7339
LHFPL4	-3.20449	1.12411	-11.478	8.73675e-27	7.24124e-26	49.7222
ZDHHC15	-2.05052	-2.80042	-11.4754	8.9368e-27	7.3951e-26	49.6997
PAPPA2	-2.52896	-4.25198	-11.4719	9.21891e-27	7.6224e-26	49.6688
CHRM2	-3.63665	-4.80298	-11.4549	1.07149e-26	8.82732e-26	49.5196
ASCL1	-1.56342	-9.18699	-11.4539	1.08126e-26	8.90064e-26	49.5106
NRAP	-2.77436	0.235886	-11.4536	1.08466e-26	8.92506e-26	49.5075
PNOC	-2.63768	2.03371	-11.4517	1.10294e-26	9.07182e-26	49.4909
NHSL1	-1.08743	7.88486	-11.4499	1.12068e-26	9.2104e-26	49.475
CDKL2	-2.10819	0.866202	-11.4491	1.1285e-26	9.26726e-26	49.4681
MEF2C	-1.76379	2.27055	-11.4425	1.19649e-26	9.82166e-26	49.4101
SCRG1	-3.24052	-4.00105	-11.4412	1.21023e-26	9.92647e-26	49.3987
PLN	-3.32471	-2.64459	-11.4402	1.22056e-26	1.00072e-25	49.3903
MYO1A	-2.21775	9.26711	-11.4332	1.29851e-26	1.06336e-25	49.3289
AKAP6	-1.93067	3.53275	-11.4282	1.35648e-26	1.10906e-25	49.2855
OR2W3	-2.44691	-3.79461	-11.421	1.44592e-26	1.18078e-25	49.2221
CLEC17A	-2.27665	-7.04662	-11.4155	1.51872e-26	1.23826e-25	49.1734
SLC18A2	-1.81656	-6.19163	-11.4152	1.52192e-26	1.24038e-25	49.1713
TMEM132D	-1.88189	-5.72513	-11.4121	1.56432e-26	1.27442e-25	49.144
WSCD2	-2.87896	-6.71541	-11.4086	1.61322e-26	1.31322e-25	49.1135
NPR1	-2.1055	-2.08133	-11.4085	1.61462e-26	1.31384e-25	49.1126
CD48	-2.28388	-0.00508452	-11.4054	1.65961e-26	1.34991e-25	49.0853
CP	-3.86844	-5.37095	-11.3967	1.79243e-26	1.45507e-25	49.0089
AMICA1	-2.07399	-1.99172	-11.3962	1.79936e-26	1.46011e-25	49.0051
AHNAK	-1.58022	7.79148	-11.3904	1.89467e-26	1.53624e-25	48.9539
LGALS3	-1.24321	11.8325	-11.3884	1.92784e-26	1.56252e-25	48.9366
CATSPERG	-1.74495	-3.61588	-11.3825	2.03039e-26	1.64498e-25	48.8852
TMEM155	-1.64821	-3.61467	-11.3775	2.12169e-26	1.71692e-25	48.8415
GPR34	-2.16163	-2.05041	-11.3748	2.17331e-26	1.75731e-25	48.8177
CD79B	-2.53888	3.18162	-11.3742	2.18588e-26	1.76608e-25	48.812
CASZ1	-1.01388	2.65366	-11.3738	2.19341e-26	1.77077e-25	48.8086
ZNF540	-1.53028	-5.88144	-11.3713	2.24219e-26	1.80873e-25	48.7867
SLC9A2	-2.88816	0.827621	-11.366	2.34886e-26	1.89404e-25	48.7406
TMEM130	-2.61739	-6.85815	-11.3652	2.36431e-26	1.905e-25	48.7341
CHRDL1	-4.39296	-1.30253	-11.3644	2.38279e-26	1.91913e-25	48.7264
PDE3A	-2.84448	1.52275	-11.3535	2.62282e-26	2.10915e-25	48.6311
C10orf140	-1.67141	-5.73023	-11.3507	2.68673e-26	2.15885e-25	48.6072
B3GALT5	-3.50912	1.18087	-11.34	2.95171e-26	2.36713e-25	48.5139
PPP1R16B	-2.13492	-2.87347	-11.3289	3.25574e-26	2.6079e-25	48.4166
ZNF781	-1.5946	-1.23286	-11.3256	3.35152e-26	2.68043e-25	48.3878
SORCS3	-1.59087	-2.83956	-11.3247	3.37908e-26	2.70037e-25	48.3797
TXNIP	-1.63383	3.59487	-11.3242	3.39299e-26	2.71043e-25	48.3756
RGMA	-2.90197	-3.86871	-11.3213	3.47955e-26	2.77634e-25	48.3506
EMP1	-1.80045	8.31021	-11.3212	3.48237e-26	2.77751e-25	48.3498
PLCG2	-2.16335	-2.5852	-11.32	3.52064e-26	2.80694e-25	48.339
JPH2	-2.87511	2.0232	-11.3179	3.58507e-26	2.8572e-25	48.321
DIXDC1	-1.35881	4.18661	-11.3028	4.09548e-26	3.24885e-25	48.1889
GLDN	-2.40277	0.147541	-11.2931	4.45969e-26	3.5323e-25	48.1043
SALL2	-2.26294	-3.1378	-11.2898	4.58768e-26	3.63088e-25	48.0762
FXYD6	-2.32762	-1.5225	-11.2892	4.61204e-26	3.64735e-25	48.071
RASGRP4	-2.17476	2.61987	-11.2792	5.0354e-26	3.97756e-25	47.9838
CYS1	-2.27773	0.385463	-11.2789	5.05017e-26	3.98769e-25	47.9809
RAB37	-1.85213	-1.39968	-11.2742	5.26163e-26	4.15307e-25	47.9402
ADIPOQ	-4.60469	1.56415	-11.26	5.96119e-26	4.69261e-25	47.8164
LANCL3	-1.97493	-3.88845	-11.2577	6.08258e-26	4.78633e-25	47.7964
LRRC66	-1.92137	5.42114	-11.2517	6.4117e-26	5.03759e-25	47.7441
TLR10	-2.64824	-5.63611	-11.2507	6.46756e-26	5.07759e-25	47.7355
FXYD3	-1.89761	2.63127	-11.2431	6.9133e-26	5.41925e-25	47.6693
TMEM151B	-1.60503	1.92175	-11.24	7.10334e-26	5.56609e-25	47.6424
SMPD3	-1.54012	-0.440576	-11.2389	7.1668e-26	5.61367e-25	47.6336
CGN	-1.16286	9.22951	-11.2338	7.4967e-26	5.86537e-25	47.5889
LRP10	-1.04684	10.2577	-11.2337	7.50394e-26	5.86879e-25	47.588
LILRA4	-2.16924	-1.29112	-11.2271	7.95107e-26	6.20904e-25	47.5305
SLCO1C1	-1.34475	-4.47983	-11.2256	8.053e-26	6.28385e-25	47.5179
CLCA1	-7.1557	7.45531	-11.222	8.31088e-26	6.48015e-25	47.4866
MAN1A1	-1.52983	-0.760078	-11.2217	8.3353e-26	6.49672e-25	47.4837
DENND2A	-1.59754	-3.31549	-11.2193	8.51502e-26	6.63428e-25	47.4625
FAS	-1.56259	-1.73438	-11.2174	8.65512e-26	6.74088e-25	47.4464
FER1L6	-4.49778	-0.466468	-11.2131	8.98425e-26	6.99457e-25	47.4093
CNKSR2	-1.5035	-8.15857	-11.2074	9.44341e-26	7.34368e-25	47.3599
PIGZ	-2.08687	0.166871	-11.2038	9.74728e-26	7.57425e-25	47.3284
TACR1	-2.52236	-5.45896	-11.2003	1.00493e-25	7.80598e-25	47.2982
GPR82	-1.80095	-4.78924	-11.2001	1.00667e-25	7.81356e-25	47.2964
ZNF219	-1.07726	3.84849	-11.1982	1.02375e-25	7.94312e-25	47.2798
SEC1	-1.22056	-1.61296	-11.1977	1.02815e-25	7.97428e-25	47.2755
IL5RA	-1.63024	0.688263	-11.1974	1.03079e-25	7.99173e-25	47.273
LOC144571	-1.49753	-5.72972	-11.192	1.08043e-25	8.35822e-25	47.2263
OMD	-3.45841	-4.85391	-11.192	1.0805e-25	8.35822e-25	47.2262
VSIG2	-5.01024	-1.54249	-11.1875	1.12419e-25	8.67978e-25	47.1869
DACT3	-2.34624	3.59338	-11.1863	1.13537e-25	8.76285e-25	47.1771
PDE1C	-1.96317	-5.38055	-11.1851	1.1479e-25	8.85623e-25	47.1662
TMEM74	-1.72422	-7.6655	-11.1836	1.16258e-25	8.96611e-25	47.1536
DLG2	-2.3799	1.92255	-11.1831	1.16797e-25	9.00432e-25	47.149
CLIP4	-2.35929	-3.83827	-11.1789	1.21125e-25	9.33445e-25	47.1129
EDN2	-2.68681	-2.14484	-11.1751	1.25178e-25	9.6287e-25	47.0802
CYP21A2	-1.90977	2.16042	-11.1745	1.25858e-25	9.67741e-25	47.0748
C18orf34	-1.50429	0.619697	-11.173	1.27586e-25	9.80662e-25	47.0613
KLC4	-1.13009	3.75768	-11.1682	1.33002e-25	1.02152e-24	47.0201
KIAA0125	-3.25542	-1.06349	-11.1678	1.33525e-25	1.02478e-24	47.0162
LXN	-1.44899	4.57665	-11.161	1.4159e-25	1.08505e-24	46.958
IGSF3	-1.15958	5.5289	-11.1602	1.42597e-25	1.09236e-24	46.9509
KLRB1	-2.49056	3.04551	-11.1593	1.43696e-25	1.09995e-24	46.9433
BEX4	-2.15564	-0.980377	-11.1549	1.49322e-25	1.14259e-24	46.9052
SLC20A1	-1.03671	-0.57585	-11.1513	1.54167e-25	1.17879e-24	46.8735
CRYAB	-2.37536	1.12668	-11.1485	1.57954e-25	1.20682e-24	46.8495
ATP6V0D2	-2.40302	3.41173	-11.1484	1.5801e-25	1.20682e-24	46.8491
EPB41L4A	-1.59503	-3.36112	-11.1436	1.64774e-25	1.25568e-24	46.8075
RAB6B	-1.75829	-2.60567	-11.1411	1.6846e-25	1.28282e-24	46.7856
ARMCX1	-1.94419	-3.48383	-11.14	1.70118e-25	1.29496e-24	46.7759
STAR	-1.21527	-5.8351	-11.1308	1.84294e-25	1.39925e-24	46.6965
KCNK2	-2.45669	-7.49374	-11.1299	1.85763e-25	1.40987e-24	46.6886
RASGRP2	-2.25286	0.172944	-11.1272	1.9011e-25	1.4418e-24	46.6656
HEPACAM2	-4.7993	4.60039	-11.1271	1.90232e-25	1.44219e-24	46.665
VWA3B	-2.07052	-5.18729	-11.1265	1.91383e-25	1.45039e-24	46.659
DNAJB5	-1.99403	-1.72354	-11.1259	1.92241e-25	1.45635e-24	46.6546
FAM46B	-2.33488	-2.29555	-11.1236	1.96126e-25	1.48524e-24	46.6347
BDKRB2	-1.38535	-0.886738	-11.1234	1.9653e-25	1.48774e-24	46.6327
STAB1	-1.88424	2.32529	-11.1218	1.99243e-25	1.50717e-24	46.6191
GIMAP8	-1.74146	-2.97201	-11.1148	2.11853e-25	1.60138e-24	46.5582
BTLA	-2.10324	-6.55157	-11.1125	2.16036e-25	1.63239e-24	46.5388
FAM19A4	-1.39846	-1.59122	-11.1061	2.28458e-25	1.72372e-24	46.4833
LRFN5	-2.20891	-5.97019	-11.1046	2.31406e-25	1.74468e-24	46.4706
CCL13	-3.52643	0.957298	-11.0984	2.44354e-25	1.83893e-24	46.4166
CYBRD1	-2.15964	5.7862	-11.0951	2.51463e-25	1.89104e-24	46.3881
MEGF10	-2.04788	-7.18736	-11.0873	2.68976e-25	2.02052e-24	46.3213
NRG4	-1.90719	1.06344	-11.0821	2.81431e-25	2.11253e-24	46.2764
EML1	-2.17586	-2.31581	-11.0803	2.8592e-25	2.14545e-24	46.2607
OSBPL1A	-1.81997	-1.4976	-11.0794	2.88059e-25	2.15913e-24	46.2533
PCSK5	-2.10912	5.2277	-11.0749	2.99718e-25	2.24406e-24	46.214
OTUD7A	-1.923	-4.15329	-11.073	3.04515e-25	2.27914e-24	46.1982
ADAM33	-2.93031	3.92326	-11.0718	3.07939e-25	2.30393e-24	46.1871
FGF10	-1.8899	0.536599	-11.0702	3.12243e-25	2.33443e-24	46.1734
SCG2	-2.76794	-2.77899	-11.0644	3.28239e-25	2.45135e-24	46.1238
SLC10A1	-1.10089	-6.88504	-11.0621	3.3499e-25	2.50085e-24	46.1036
C5orf20	-2.24095	-4.11475	-11.0549	3.5642e-25	2.65793e-24	46.0421
LPCAT4	-1.01318	1.31118	-11.0507	3.69787e-25	2.75462e-24	46.0056
PPP2R2B	-2.17357	-7.20302	-11.0483	3.77416e-25	2.80839e-24	45.9853
TP53INP1	-1.18964	4.42194	-11.0434	3.93729e-25	2.92766e-24	45.9433
MFAP4	-2.69789	0.91027	-11.0389	4.09666e-25	3.04285e-24	45.904
GPR37L1	-1.54533	2.28013	-11.0369	4.16609e-25	3.09106e-24	45.8873
COL29A1	-2.15152	-7.62781	-11.0347	4.24784e-25	3.15059e-24	45.868
SPARCL1	-2.22907	-0.768525	-11.0305	4.40482e-25	3.26112e-24	45.832
MASP1	-3.86863	-3.36735	-11.0286	4.47621e-25	3.31278e-24	45.8161
KIT	-2.40321	-2.76513	-11.0271	4.53666e-25	3.35631e-24	45.8028
ZNF727	-1.63858	-4.44348	-11.0223	4.72816e-25	3.4917e-24	45.7617
LEAP2	-1.69659	1.20919	-11.0198	4.83142e-25	3.56667e-24	45.7403
FLJ36777	-1.33329	-5.88014	-11.0178	4.91866e-25	3.62846e-24	45.7226
GIMAP1	-1.74932	-2.50433	-10.999	5.7881e-25	4.25455e-24	45.5611
KLK15	-2.76481	-2.72902	-10.9946	6.01197e-25	4.41279e-24	45.5234
MB	-3.20646	1.90526	-10.9925	6.12066e-25	4.49096e-24	45.5057
LOC338758	-1.08992	-4.87996	-10.988	6.3624e-25	4.66667e-24	45.4673
CDKN1A	-1.39836	9.39912	-10.9847	6.54805e-25	4.79769e-24	45.4387
KCNN3	-2.1629	-2.50201	-10.973	7.24811e-25	5.29927e-24	45.338
ARHGAP42	-1.16076	5.58458	-10.9692	7.4894e-25	5.4679e-24	45.3055
SLC44A4	-1.65092	3.91132	-10.9686	7.52681e-25	5.49326e-24	45.3005
FAM13C	-2.14594	2.19925	-10.9571	8.31509e-25	6.0578e-24	45.2017
C14orf159	-1.19434	2.11754	-10.9536	8.56796e-25	6.23097e-24	45.172
TTC38	-1.10225	0.830438	-10.9495	8.87368e-25	6.44873e-24	45.1372
TPSB2	-2.79383	2.54234	-10.9481	8.98661e-25	6.52618e-24	45.1247
WNT9A	-2.06107	-5.05924	-10.9408	9.57118e-25	6.94088e-24	45.0622
LILRP2	-1.36701	0.745455	-10.9387	9.74569e-25	7.06494e-24	45.0443
FRMD4B	-1.08598	5.95777	-10.9378	9.81449e-25	7.1123e-24	45.0373
FILIP1	-2.18611	-1.63022	-10.9366	9.92298e-25	7.18585e-24	45.0264
KCNB2	-1.46184	-7.38618	-10.9292	1.0578e-24	7.65476e-24	44.963
MEIS3P1	-2.00573	-1.46453	-10.9228	1.11712e-24	8.07552e-24	44.9089
LIX1	-1.83471	-8.18293	-10.9187	1.15715e-24	8.35904e-24	44.8739
CNTNAP4	-1.09167	-7.55225	-10.9167	1.17783e-24	8.50241e-24	44.8564
SEMA4G	-1.18221	7.01147	-10.9162	1.18294e-24	8.53631e-24	44.8521
NPAS3	-2.06883	-3.58509	-10.9081	1.26865e-24	9.1387e-24	44.7827
GPR26	-1.13335	0.0661182	-10.9029	1.32654e-24	9.54573e-24	44.7384
ANKRD56	-1.15174	0.783725	-10.8899	1.48337e-24	1.06407e-23	44.6276
RBM24	-2.40083	-2.13888	-10.8815	1.59408e-24	1.14148e-23	44.5562
TUSC5	-3.17717	-3.76562	-10.8814	1.5965e-24	1.14282e-23	44.5547
KIF13B	-1.1829	8.15702	-10.8782	1.64015e-24	1.17244e-23	44.528
KRT20	-3.44065	3.07672	-10.8775	1.64996e-24	1.17904e-23	44.522
SMYD1	-3.13482	-4.35955	-10.8768	1.65993e-24	1.18575e-23	44.5161
LMO2	-1.41645	-1.70828	-10.8617	1.8907e-24	1.34544e-23	44.387
POPDC2	-2.43309	2.97073	-10.8575	1.96012e-24	1.3934e-23	44.3512
PPARGC1B	-1.30823	5.21342	-10.8556	1.99295e-24	1.41625e-23	44.3347
UBE2QL1	-2.40617	-5.58063	-10.8519	2.05731e-24	1.461e-23	44.3032
CD79A	-3.37573	-2.36359	-10.8519	2.05736e-24	1.461e-23	44.3032
CAMK4	-1.84988	2.09343	-10.8492	2.10538e-24	1.49459e-23	44.2803
EHHADH	-1.12914	2.60329	-10.8483	2.12102e-24	1.50517e-23	44.273
AOC3	-2.55463	-0.442205	-10.8472	2.14116e-24	1.51893e-23	44.2636
GPR162	-1.49608	-2.09898	-10.8469	2.14615e-24	1.52195e-23	44.2613
AGFG2	-1.04708	2.9465	-10.8463	2.15883e-24	1.53042e-23	44.2554
CLVS2	-1.15556	-5.62709	-10.8453	2.17635e-24	1.5423e-23	44.2474
CHCHD10	-1.27984	1.46488	-10.845	2.18203e-24	1.54579e-23	44.2448
C1QTNF9	-1.75908	-4.56345	-10.8449	2.18371e-24	1.54645e-23	44.2441
PPARGC1A	-2.23325	2.43249	-10.8426	2.2269e-24	1.57649e-23	44.2247
AKAP5	-1.82053	-2.413	-10.8422	2.23595e-24	1.58235e-23	44.2206
ACOT2	-1.03809	-1.50349	-10.8418	2.24409e-24	1.58757e-23	44.217
MSRA	-1.092	-3.77855	-10.8388	2.30171e-24	1.6272e-23	44.1919
LOC389332	-3.09076	-2.19069	-10.8386	2.30574e-24	1.62949e-23	44.1902
VWA5A	-1.70796	7.01803	-10.8378	2.32066e-24	1.63891e-23	44.1838
GCNT3	-3.11569	1.07347	-10.829	2.5046e-24	1.76517e-23	44.1081
MGAM	-2.2316	-0.8019	-10.819	2.7289e-24	1.92127e-23	44.023
THRB	-2.95109	-3.23759	-10.8186	2.73799e-24	1.92701e-23	44.0197
ZBTB7C	-3.10116	5.05754	-10.8177	2.75763e-24	1.94017e-23	44.0127
FAM95B1	-2.47288	-5.70018	-10.8175	2.76234e-24	1.94282e-23	44.011
PARM1	-1.75001	7.36472	-10.8069	3.0262e-24	2.12621e-23	43.9205
NPY1R	-3.11003	-1.40528	-10.8064	3.03915e-24	2.13458e-23	43.9163
CD27	-2.38743	-3.44731	-10.8034	3.11883e-24	2.1898e-23	43.8906
DES	-4.77742	7.2692	-10.8028	3.1332e-24	2.19838e-23	43.886
CLDN11	-2.51261	-2.55897	-10.8025	3.14168e-24	2.20357e-23	43.8834
SEMA3G	-1.97463	4.26752	-10.7819	3.74906e-24	2.62153e-23	43.7081
MRGPRF	-2.42413	-2.94716	-10.7715	4.09881e-24	2.86025e-23	43.6196
SI	-5.13675	-2.85155	-10.77	4.15075e-24	2.89551e-23	43.6071
C13orf30	-1.5576	-2.6864	-10.7588	4.56928e-24	3.18531e-23	43.5119
PRHOXNB	-1.97613	-4.94153	-10.7587	4.5718e-24	3.18599e-23	43.5113
KITLG	-1.28011	0.933217	-10.7565	4.65723e-24	3.24332e-23	43.493
CCL8	-3.07327	-2.28581	-10.7555	4.69704e-24	3.26993e-23	43.4845
SLC9A3R1	-1.06579	9.20782	-10.7551	4.71435e-24	3.27976e-23	43.4809
ITPKA	-1.99533	5.30873	-10.754	4.75871e-24	3.30837e-23	43.4716
TRPM4	-1.2469	3.47525	-10.752	4.83919e-24	3.35977e-23	43.455
MPP2	-1.85524	-3.59185	-10.7501	4.92015e-24	3.41252e-23	43.4385
POU3F4	-1.04883	-0.221391	-10.7488	4.97559e-24	3.44981e-23	43.4274
DPYD	-2.37024	-0.974754	-10.7481	5.00644e-24	3.47003e-23	43.4213
JAZF1	-1.50591	3.25073	-10.7386	5.42729e-24	3.75665e-23	43.3412
PLXNA2	-1.06255	8.1353	-10.7383	5.44253e-24	3.76593e-23	43.3384
KCTD8	-1.48434	0.169795	-10.7354	5.57967e-24	3.85952e-23	43.3138
SLC6A16	-1.61102	-4.48899	-10.7339	5.65184e-24	3.90813e-23	43.301
FAM55D	-4.8735	-3.71302	-10.732	5.74084e-24	3.967e-23	43.2855
TMTC1	-2.0298	-0.214097	-10.7266	6.01401e-24	4.14818e-23	43.2394
NBEA	-2.74968	-5.58377	-10.7266	6.01517e-24	4.14818e-23	43.2392
RAB30	-1.44136	-0.979478	-10.7187	6.43519e-24	4.43188e-23	43.1723
AK5	-2.08057	1.72012	-10.7144	6.67114e-24	4.58976e-23	43.1366
PIP5K1B	-1.17779	3.95775	-10.7086	7.01339e-24	4.81394e-23	43.087
LOC643008	-1.8366	-4.92346	-10.7062	7.15422e-24	4.90732e-23	43.0673
FAM59A	-1.18543	5.69098	-10.7059	7.17687e-24	4.91957e-23	43.0642
SNX32	-2.32383	-4.4332	-10.7048	7.24035e-24	4.95977e-23	43.0554
CLCA2	-2.77297	-2.62174	-10.6992	7.59484e-24	5.19567e-23	43.008
PALM	-2.23234	-0.948073	-10.6861	8.49016e-24	5.79851e-23	42.8975
STK32B	-1.85234	-0.236124	-10.674	9.41193e-24	6.42377e-23	42.7953
RNF125	-1.78619	5.90805	-10.6524	1.13173e-23	7.70885e-23	42.6125
SH3BP1	-1.00682	6.03106	-10.6511	1.14394e-23	7.78754e-23	42.6019
ST8SIA1	-2.0771	-5.05371	-10.6453	1.20198e-23	8.17647e-23	42.5528
KLHDC1	-1.44997	3.15762	-10.645	1.20521e-23	8.19571e-23	42.5502
CDH23	-2.01594	0.587559	-10.6415	1.24153e-23	8.43438e-23	42.5207
KIAA0495	-1.83375	-3.02745	-10.6402	1.25545e-23	8.52328e-23	42.5097
CYP3A4	-2.94686	-7.13731	-10.6383	1.27526e-23	8.6549e-23	42.4942
KCNK10	-2.43117	-4.44433	-10.6305	1.36268e-23	9.23297e-23	42.4284
MFAP5	-3.50322	2.12691	-10.6249	1.42941e-23	9.67229e-23	42.381
RAB39B	-1.92365	-5.6938	-10.622	1.46526e-23	9.9116e-23	42.3565
ARHGAP15	-1.90165	-4.89971	-10.6209	1.47825e-23	9.99291e-23	42.3477
GIMAP6	-1.79424	-1.59279	-10.6207	1.48082e-23	1.0007e-22	42.346
PLCD4	-1.22497	1.70734	-10.6187	1.50647e-23	1.01703e-22	42.329
CPAMD8	-1.54747	-3.90442	-10.6182	1.51326e-23	1.02094e-22	42.3245
ARHGAP36	-1.46464	0.249783	-10.6159	1.54282e-23	1.0402e-22	42.3053
LRCH2	-2.20975	0.907417	-10.6123	1.59049e-23	1.07129e-22	42.2752
C14orf132	-2.26822	-0.225493	-10.6098	1.62408e-23	1.09212e-22	42.2544
EFHA2	-1.84771	0.486725	-10.6096	1.62784e-23	1.09429e-22	42.2521
C20orf194	-2.07365	4.42276	-10.6021	1.73337e-23	1.16332e-22	42.1899
CCL14-CCL15	-2.00529	-0.593155	-10.6016	1.74103e-23	1.16732e-22	42.1855
MEI1	-2.06114	-3.38161	-10.5933	1.86905e-23	1.25234e-22	42.1152
PER3	-1.80476	-0.823975	-10.593	1.87306e-23	1.25461e-22	42.113
APOB48R	-1.99112	-2.47701	-10.5914	1.89934e-23	1.27097e-22	42.0992
PCSK6	-1.12786	6.51746	-10.5913	1.90051e-23	1.27134e-22	42.0986
XCL2	-1.89633	-0.752481	-10.5864	1.98094e-23	1.32428e-22	42.0575
DHRS1	-1.02173	2.96009	-10.5756	2.17142e-23	1.44832e-22	41.9665
FOXP2	-3.1744	-4.6085	-10.5659	2.35646e-23	1.56919e-22	41.8854
GSTM2	-2.02825	-0.912624	-10.5549	2.58534e-23	1.71937e-22	41.7935
SLC24A4	-1.42471	-1.5282	-10.5514	2.66367e-23	1.76974e-22	41.7639
ZFR2	-1.11436	-7.48884	-10.5502	2.69118e-23	1.78687e-22	41.7537
GPR172B	-2.48622	-4.98863	-10.5494	2.70918e-23	1.79766e-22	41.7471
RTN1	-2.33573	-2.73622	-10.5449	2.81381e-23	1.86648e-22	41.7096
C14orf64	-2.31001	-1.17917	-10.5446	2.82239e-23	1.87156e-22	41.7066
CCDC129	-2.19872	-3.95586	-10.5415	2.89526e-23	1.91927e-22	41.6813
ANTXR2	-1.22408	-0.00707726	-10.5359	3.03643e-23	2.0109e-22	41.6341
GCOM1	-1.41501	0.39675	-10.5336	3.09577e-23	2.04887e-22	41.6149
CHRNA1	-2.06782	2.87172	-10.5316	3.14936e-23	2.08367e-22	41.5979
PITPNM3	-1.74276	1.06596	-10.5304	3.17995e-23	2.10323e-22	41.5883
BHMT2	-2.37101	-3.25186	-10.5303	3.18303e-23	2.10459e-22	41.5874
ARSA	-1.07252	2.8358	-10.5285	3.23313e-23	2.13639e-22	41.5719
ABCA5	-1.43525	3.38436	-10.5285	3.23319e-23	2.13639e-22	41.5719
CXCR5	-2.7786	-7.00764	-10.5273	3.26596e-23	2.15734e-22	41.5619
MRGPRE	-1.00618	-6.62276	-10.5249	3.33145e-23	2.19918e-22	41.5422
DSEL	-1.89494	3.84441	-10.5176	3.5434e-23	2.33759e-22	41.481
FAM132A	-2.41371	2.79442	-10.5153	3.61323e-23	2.38214e-22	41.4617
PIK3CG	-2.39741	-1.20269	-10.5141	3.6516e-23	2.40666e-22	41.4512
PLIN4	-4.02021	-0.109967	-10.5136	3.66582e-23	2.41525e-22	41.4474
FCGBP	-4.58911	4.30284	-10.5104	3.76635e-23	2.4791e-22	41.4205
ADCY2	-2.29836	-4.62069	-10.507	3.8766e-23	2.55004e-22	41.3919
DARC	-3.29249	-3.35694	-10.5033	3.99861e-23	2.62692e-22	41.3612
PC	-1.18231	-1.54134	-10.499	4.14708e-23	2.72098e-22	41.3251
GAPT	-2.17613	2.19249	-10.4966	4.23224e-23	2.77508e-22	41.3049
NCF1C	-2.55441	-5.27855	-10.4937	4.33568e-23	2.84109e-22	41.281
LEPREL1	-2.282	5.69685	-10.4931	4.359e-23	2.85547e-22	41.2757
SGCE	-1.90452	-2.21098	-10.4835	4.72446e-23	3.09289e-22	41.1959
CACNB2	-1.94469	3.47804	-10.4813	4.81129e-23	3.14573e-22	41.1778
FAM22D	-1.00564	2.00788	-10.4782	4.94131e-23	3.22868e-22	41.1514
GNAL	-1.90826	-3.41973	-10.4769	4.99483e-23	3.26261e-22	41.1407
CYTSB	-1.36108	3.61284	-10.4721	5.20076e-23	3.39389e-22	41.1007
CPB1	-2.28067	-6.30598	-10.4621	5.65936e-23	3.68379e-22	41.0169
GNAI1	-1.63068	-0.957456	-10.4614	5.691e-23	3.70203e-22	41.0114
GCK	-1.28806	-0.896424	-10.4604	5.74002e-23	3.72919e-22	41.0029
CLIP3	-1.86746	1.60041	-10.4551	5.99876e-23	3.89483e-22	40.9592
PTPRCAP	-1.98972	-0.954566	-10.4526	6.12841e-23	3.97775e-22	40.938
KCNG1	-2.78911	0.969473	-10.4415	6.72769e-23	4.35708e-22	40.8455
ACOT11	-1.09	0.515347	-10.4374	6.96364e-23	4.50421e-22	40.8113
CHRNA3	-2.80639	-0.60305	-10.4356	7.0716e-23	4.57116e-22	40.7961
GRRP1	-1.44039	2.59101	-10.4353	7.08608e-23	4.57763e-22	40.7941
ST6GALNAC3	-1.70542	-0.82079	-10.4298	7.42115e-23	4.79108e-22	40.7483
P2RY8	-1.81077	-0.80393	-10.4253	7.7079e-23	4.96995e-22	40.7107
BDH1	-1.05863	0.307814	-10.4234	7.83129e-23	5.04475e-22	40.695
LRRC55	-1.93615	-4.24411	-10.4218	7.93877e-23	5.11079e-22	40.6814
TLR7	-2.25426	-2.93979	-10.4209	8.00032e-23	5.14721e-22	40.6738
ATP8B4	-1.42379	2.01091	-10.4193	8.10718e-23	5.21267e-22	40.6606
STXBP5L	-2.2525	0.125808	-10.4174	8.23467e-23	5.29132e-22	40.6452
TARP	-1.88654	-6.87365	-10.4154	8.37905e-23	5.37737e-22	40.628
ZNF396	-1.11796	-4.43632	-10.4105	8.72528e-23	5.58908e-22	40.5878
PTPRT	-1.99032	-9.15126	-10.406	9.06446e-23	5.7973e-22	40.55
RGS2	-1.92297	-1.3827	-10.4051	9.13312e-23	5.83939e-22	40.5425
HBA2	-2.54938	0.493616	-10.4047	9.16283e-23	5.85657e-22	40.5393
ODZ1	-2.19992	0.250258	-10.4035	9.25827e-23	5.91573e-22	40.5291
FAM46A	-1.28782	-0.31912	-10.3911	1.02715e-22	6.56111e-22	40.4261
KCNT2	-1.78627	-3.6195	-10.3893	1.04281e-22	6.65702e-22	40.4111
STAC2	-1.63696	-7.62885	-10.3881	1.05304e-22	6.71814e-22	40.4015
LRRTM2	-1.47695	-5.72181	-10.388	1.05393e-22	6.72169e-22	40.4006
LIPH	-1.4458	4.15998	-10.3875	1.05793e-22	6.74514e-22	40.3969
SLC16A9	-2.5815	5.90677	-10.3826	1.10274e-22	7.02213e-22	40.3557
MSTN	-1.73361	-7.92369	-10.381	1.1173e-22	7.11039e-22	40.3428
LOC400043	-1.82396	2.96161	-10.3771	1.15512e-22	7.33972e-22	40.3098
CHST5	-3.90963	6.37626	-10.373	1.19467e-22	7.58867e-22	40.2764
EXTL1	-1.69639	-2.17214	-10.3721	1.2038e-22	7.6443e-22	40.2688
ITIH5	-2.11579	-0.878807	-10.3718	1.20752e-22	7.66557e-22	40.2658
AKR1C2	-2.12149	-3.00985	-10.3685	1.24141e-22	7.87826e-22	40.2384
FLJ40330	-2.59774	-1.83419	-10.3656	1.27114e-22	8.05943e-22	40.2149
SPEG	-3.14223	1.51214	-10.3644	1.28405e-22	8.13628e-22	40.2049
CIDEC	-2.94825	-3.94575	-10.3637	1.29211e-22	8.18486e-22	40.1987
SLC9A3	-4.28044	3.53972	-10.3318	1.68697e-22	1.06663e-21	39.9344
ADRA1B	-1.76566	-4.16679	-10.3311	1.6963e-22	1.0722e-21	39.929
PP14571	-2.00163	-2.09982	-10.3281	1.73913e-22	1.09792e-21	39.9042
ZNF542	-1.79642	-3.30756	-10.3265	1.76301e-22	1.11231e-21	39.8907
APBA1	-1.5721	-0.227626	-10.3256	1.77672e-22	1.11993e-21	39.8831
TCL1A	-3.32299	-2.63969	-10.3232	1.812e-22	1.14146e-21	39.8636
ZNF677	-1.72848	1.83803	-10.3197	1.86663e-22	1.17408e-21	39.8341
BIN2	-1.27933	4.82477	-10.3196	1.86756e-22	1.1743e-21	39.8336
LRP1B	-1.55342	-6.99641	-10.3173	1.90289e-22	1.19579e-21	39.8151
CALB2	-3.53217	-0.808921	-10.3172	1.90544e-22	1.19702e-21	39.8137
PID1	-2.24526	6.24457	-10.3166	1.91465e-22	1.20244e-21	39.809
PLIN1	-2.95424	-4.13263	-10.3162	1.92166e-22	1.20647e-21	39.8053
TRIM36	-1.7515	6.04343	-10.3111	2.00505e-22	1.25691e-21	39.7632
MAF	-1.64417	-0.643258	-10.3108	2.01037e-22	1.25985e-21	39.7606
B2M	-1.13564	0.377222	-10.3083	2.05148e-22	1.28484e-21	39.7406
HIPK4	-1.15927	-2.84528	-10.3062	2.0884e-22	1.30756e-21	39.7229
TSPAN11	-1.9531	5.29109	-10.2943	2.30588e-22	1.44065e-21	39.6247
LOC154822	-1.71706	-7.25119	-10.2869	2.45253e-22	1.52902e-21	39.5636
PACSIN1	-1.8804	2.18462	-10.2865	2.46177e-22	1.53431e-21	39.5599
PTPLAD2	-1.68263	-0.754003	-10.2826	2.54284e-22	1.58243e-21	39.5278
CKB	-2.75695	2.50173	-10.2629	2.99464e-22	1.85516e-21	39.3657
CLIC2	-1.64924	-2.23125	-10.2568	3.1519e-22	1.94905e-21	39.315
SRL	-1.78608	-2.64962	-10.2566	3.15546e-22	1.95067e-21	39.3139
ABCA10	-1.95516	2.02236	-10.2551	3.19697e-22	1.97573e-21	39.301
CD1C	-2.32345	-3.96858	-10.2545	3.2128e-22	1.98492e-21	39.2961
GP2	-3.9766	-4.86425	-10.2539	3.22843e-22	1.99397e-21	39.2912
CX3CR1	-1.92155	-4.43982	-10.2517	3.28786e-22	2.03007e-21	39.2732
TNS1	-2.37515	0.44453	-10.2486	3.37488e-22	2.08255e-21	39.2473
CASP5	-2.5073	-2.87688	-10.2462	3.4415e-22	2.12301e-21	39.2279
GSTM2P1	-1.07397	-6.93676	-10.245	3.47703e-22	2.14364e-21	39.2177
GJA9	-1.58871	0.283991	-10.2374	3.70177e-22	2.28015e-21	39.1557
SLC46A3	-1.36257	0.915283	-10.2351	3.77358e-22	2.32368e-21	39.1366
MEIS1	-2.08753	-3.51055	-10.2339	3.81119e-22	2.34614e-21	39.1268
IL17B	-1.31077	-5.56033	-10.2337	3.81967e-22	2.35065e-21	39.1246
MATN2	-2.20828	-0.391932	-10.2306	3.91831e-22	2.40991e-21	39.0994
CACNB1	-1.1963	0.518269	-10.2272	4.02922e-22	2.47738e-21	39.0717
ALDH6A1	-1.15232	6.32303	-10.2211	4.2405e-22	2.60417e-21	39.0211
CHRNB4	-1.86152	-5.99515	-10.2159	4.42823e-22	2.71621e-21	38.9781
CMAH	-2.08157	-4.55969	-10.2137	4.50976e-22	2.76457e-21	38.9601
RIMS3	-1.97401	-4.81414	-10.1988	5.10216e-22	3.1212e-21	38.8378
TMEM132B	-1.84278	-6.61954	-10.1922	5.38579e-22	3.29088e-21	38.7842
LHX4	-1.20852	-2.72868	-10.1916	5.41468e-22	3.30745e-21	38.7789
CROT	-1.25448	-0.97782	-10.1912	5.43237e-22	3.31727e-21	38.7757
RADIL	-2.13853	1.782	-10.1902	5.47791e-22	3.34408e-21	38.7674
IQGAP2	-1.93109	-1.11226	-10.1893	5.51929e-22	3.36834e-21	38.7599
SSPN	-1.81315	2.95525	-10.1865	5.64756e-22	3.44458e-21	38.7372
MESP2	-1.7331	-1.17222	-10.1841	5.76087e-22	3.51055e-21	38.7175
B3GNT6	-4.86169	2.04215	-10.182	5.86165e-22	3.57091e-21	38.7003
COX7A1	-1.71792	-4.56576	-10.1813	5.89576e-22	3.59062e-21	38.6945
C14orf129	-1.15703	4.75016	-10.1781	6.05581e-22	3.687e-21	38.668
RERG	-2.36114	3.19637	-10.1719	6.37555e-22	3.87478e-21	38.617
ITLN1	-5.97585	-1.34623	-10.1711	6.41743e-22	3.89908e-21	38.6106
SLC31A2	-1.18608	-1.8347	-10.1663	6.67495e-22	4.05434e-21	38.5716
ANO3	-1.75836	-2.09405	-10.1612	6.96141e-22	4.22583e-21	38.5299
NOS1	-2.45965	-7.77968	-10.1608	6.98696e-22	4.24009e-21	38.5263
LOC100240735	-1.26979	-6.59715	-10.1583	7.13325e-22	4.32503e-21	38.5058
ZNF257	-2.19473	-0.519007	-10.1577	7.16648e-22	4.3439e-21	38.5012
GPIHBP1	-2.2088	-0.479195	-10.1499	7.64517e-22	4.62995e-21	38.4371
TMEM45B	-1.31137	2.42462	-10.1467	7.85216e-22	4.7511e-21	38.4107
UTS2D	-1.32778	-4.87243	-10.1465	7.86426e-22	4.75702e-21	38.4091
TUB	-2.19718	0.794267	-10.1434	8.06528e-22	4.87574e-21	38.3841
CD19	-2.95274	-0.372014	-10.1404	8.26989e-22	4.99649e-21	38.3593
GALNTL2	-2.3825	1.76881	-10.1391	8.36229e-22	5.04934e-21	38.3483
RECK	-1.54222	5.32783	-10.1349	8.65173e-22	5.22105e-21	38.3146
ZNF626	-1.78289	-5.1792	-10.1339	8.72958e-22	5.26648e-21	38.3057
GEFT	-2.09395	0.78755	-10.1329	8.79673e-22	5.30543e-21	38.2981
YPEL4	-1.70373	-8.60105	-10.13	9.0109e-22	5.43141e-21	38.2743
DDX60	-1.55825	4.84321	-10.1263	9.2895e-22	5.59441e-21	38.2441
TCP11L2	-1.28725	-0.180899	-10.126	9.3125e-22	5.60661e-21	38.2417
BFSP2	-1.41452	-8.22876	-10.1205	9.75143e-22	5.86399e-21	38.1961
CD22	-2.8914	-2.91456	-10.1198	9.80677e-22	5.89555e-21	38.1904
METRNL	-1.11824	5.52974	-10.1167	1.00597e-21	6.04406e-21	38.1652
TPSAB1	-2.55027	4.26074	-10.1091	1.07101e-21	6.42919e-21	38.1032
SLC15A2	-1.2071	-4.74605	-10.1063	1.09631e-21	6.57337e-21	38.08
GPRIN2	-1.68296	-0.929412	-10.0949	1.20391e-21	7.19963e-21	37.9873
UCHL1	-2.83042	-1.58967	-10.0934	1.21879e-21	7.28645e-21	37.9751
SNCA	-2.2626	-4.1969	-10.092	1.23289e-21	7.36863e-21	37.9637
C16orf62	-1.68899	6.91882	-10.0842	1.31436e-21	7.83955e-21	37.9003
CCL15	-1.4249	5.20026	-10.0825	1.3336e-21	7.94972e-21	37.8859
AOX1	-2.63922	-0.660869	-10.0787	1.37565e-21	8.19325e-21	37.8552
ATP2B4	-1.56583	4.73734	-10.0724	1.44855e-21	8.61494e-21	37.804
ADAM6	-3.70647	3.5727	-10.0705	1.47171e-21	8.7476e-21	37.7883
LSP1	-1.67169	3.49347	-10.0627	1.56908e-21	9.31554e-21	37.7249
TMIGD2	-1.84578	-7.16702	-10.0593	1.61429e-21	9.57016e-21	37.6967
C16orf54	-2.33499	-2.68532	-10.0586	1.62323e-21	9.62035e-21	37.6913
MAPT	-2.54984	3.07011	-10.0446	1.82133e-21	1.0782e-20	37.5772
AICDA	-1.84906	-4.26166	-10.0434	1.83899e-21	1.08834e-20	37.5676
FAM189A1	-3.59258	-5.39751	-10.0368	1.94082e-21	1.14728e-20	37.5143
SCARA3	-1.92762	3.92095	-10.0309	2.03825e-21	1.20384e-20	37.4657
EID3	-1.11157	-4.67987	-10.0242	2.15233e-21	1.26975e-20	37.4118
TNFSF12	-1.34978	-3.05571	-10.0212	2.20614e-21	1.30112e-20	37.3874
NCRNA00087	-1.45294	-4.62105	-10.0191	2.24524e-21	1.3238e-20	37.37
DPEP2	-2.03549	-3.68202	-10.0165	2.29241e-21	1.35084e-20	37.3494
SLITRK5	-2.29276	-3.36869	-10.0128	2.36444e-21	1.39249e-20	37.3187
LEPR	-1.43629	-1.50569	-10.0121	2.37742e-21	1.39973e-20	37.3133
PRR5L	-1.11903	4.82253	-10.0108	2.40381e-21	1.41405e-20	37.3024
FLNC	-2.60621	7.22405	-10.0097	2.42515e-21	1.42619e-20	37.2936
FAM134B	-1.53035	0.924818	-10.0068	2.48276e-21	1.4584e-20	37.2704
DNAJB4	-1.12294	1.86878	-10.0011	2.60121e-21	1.5271e-20	37.2242
C3orf70	-1.72749	-1.76728	-9.99218	2.79893e-21	1.64155e-20	37.1516
PPP1R3C	-2.31695	-3.86944	-9.9884	2.88707e-21	1.69251e-20	37.1209
FKBP1B	-2.02079	-0.817426	-9.97899	3.11818e-21	1.82501e-20	37.0447
ATP8A1	-1.51275	6.20234	-9.97691	3.17163e-21	1.85509e-20	37.0278
GATA1	-1.14486	-3.11571	-9.97508	3.2196e-21	1.88154e-20	37.013
PRKAA2	-3.32726	-1.90918	-9.9741	3.24542e-21	1.89555e-20	37.005
FCRL1	-2.50716	-2.69139	-9.97327	3.26744e-21	1.90787e-20	36.9984
MFNG	-1.28378	-1.77042	-9.96241	3.57083e-21	2.08146e-20	36.9104
CPNE4	-1.83999	-0.791095	-9.95515	3.78907e-21	2.20555e-20	36.8517
APLP1	-2.08188	-3.22836	-9.95459	3.8067e-21	2.21518e-20	36.8471
RFX6	-2.53707	1.33946	-9.95201	3.88762e-21	2.26035e-20	36.8262
FOXI2	-1.21357	-0.371491	-9.93677	4.40281e-21	2.55482e-20	36.703
CMBL	-2.15013	0.118074	-9.93645	4.41429e-21	2.56076e-20	36.7004
SYTL2	-1.29588	-2.91399	-9.93346	4.52327e-21	2.62324e-20	36.6763
CKMT1B	-1.30276	1.92598	-9.93045	4.6359e-21	2.68704e-20	36.6519
ST3GAL3	-1.06524	-3.3932	-9.92506	4.84397e-21	2.80527e-20	36.6084
DCN	-2.27393	9.42719	-9.92458	4.86306e-21	2.81553e-20	36.6045
KIAA1908	-1.17099	-1.78077	-9.92047	5.02879e-21	2.90984e-20	36.5713
TWIST2	-1.99797	2.49066	-9.91981	5.05614e-21	2.92484e-20	36.566
MYO1D	-1.01293	2.72484	-9.91799	5.1316e-21	2.96697e-20	36.5513
MAP6	-2.02659	0.622677	-9.91798	5.13187e-21	2.96697e-20	36.5513
PHYH	-1.05533	1.15652	-9.91653	5.19286e-21	2.9997e-20	36.5396
WFIKKN2	-1.53703	-4.68283	-9.91499	5.25879e-21	3.03608e-20	36.5271
FIGN	-1.80333	1.78384	-9.91489	5.26303e-21	3.03767e-20	36.5263
MAGI2	-1.29636	-6.88959	-9.90977	5.48717e-21	3.16437e-20	36.485
PHYHD1	-2.04882	3.11647	-9.90722	5.60228e-21	3.22803e-20	36.4644
EDNRB	-1.60832	-2.8087	-9.90534	5.68899e-21	3.27616e-20	36.4492
SCTR	-1.19859	-2.82844	-9.89622	6.12742e-21	3.52271e-20	36.3757
RGAG4	-1.81133	-0.906399	-9.89484	6.19675e-21	3.56157e-20	36.3645
MAOB	-2.76103	-0.895825	-9.88457	6.73675e-21	3.86112e-20	36.2818
SGEF	-1.56524	-5.18677	-9.88366	6.7869e-21	3.88696e-20	36.2745
LTK	-2.9638	-4.3539	-9.88365	6.78752e-21	3.88696e-20	36.2744
NAP1L3	-2.07296	-4.12504	-9.87654	7.19124e-21	4.11128e-20	36.2172
GZMM	-2.05471	-5.07683	-9.87422	7.32844e-21	4.18739e-20	36.1984
MS4A1	-3.52678	-4.85114	-9.87397	7.34327e-21	4.19469e-20	36.1964
IKZF1	-2.01534	-3.00031	-9.87062	7.54588e-21	4.30683e-20	36.1695
PKIG	-1.01425	-0.546266	-9.87036	7.56179e-21	4.31472e-20	36.1674
KLRC1	-1.85954	-9.2285	-9.86539	7.8734e-21	4.48753e-20	36.1274
HVCN1	-1.47132	-1.89867	-9.85748	8.39584e-21	4.77602e-20	36.0638
C1orf21	-1.29195	0.480284	-9.85363	8.66263e-21	4.92506e-20	36.0328
RHOF	-2.026	-1.2425	-9.85339	8.67989e-21	4.9335e-20	36.0309
TMEM56	-1.71542	-0.5039	-9.84677	9.15839e-21	5.19971e-20	35.9777
CCL19	-3.46363	3.28101	-9.84605	9.21268e-21	5.22909e-20	35.9719
LOC283392	-1.40755	-1.42961	-9.83921	9.73807e-21	5.5151e-20	35.917
INSM1	-3.10663	-4.61742	-9.83248	1.02843e-20	5.81322e-20	35.8629
BARX2	-2.91257	3.15971	-9.82516	1.09134e-20	6.16033e-20	35.8041
SLC13A2	-3.90846	5.35972	-9.82387	1.10278e-20	6.22323e-20	35.7938
TNFAIP8L3	-1.8227	-2.80817	-9.81459	1.18894e-20	6.70022e-20	35.7193
LASS1	-1.76587	-2.4445	-9.80922	1.24176e-20	6.99408e-20	35.6763
GPRASP1	-1.6939	4.82511	-9.80857	1.24828e-20	7.02888e-20	35.6711
SCN4A	-1.85547	-7.66413	-9.80685	1.26584e-20	7.1258e-20	35.6573
TENC1	-1.16099	1.58217	-9.8066	1.26841e-20	7.1383e-20	35.6553
NLGN3	-1.39382	-4.00792	-9.80337	1.30193e-20	7.32292e-20	35.6294
HSPB2	-1.64297	3.47331	-9.80311	1.3047e-20	7.3365e-20	35.6273
SLAMF7	-2.50216	-1.14896	-9.80245	1.31175e-20	7.37409e-20	35.622
LOC96610	-2.87979	3.49212	-9.79644	1.3771e-20	7.73302e-20	35.5739
GLOD5	-1.67095	0.973851	-9.79598	1.38223e-20	7.75969e-20	35.5702
LRRN3	-1.86411	-5.30212	-9.79453	1.39846e-20	7.84653e-20	35.5586
C2orf74	-1.7726	-4.26827	-9.78822	1.47168e-20	8.2506e-20	35.5081
C5orf4	-1.90957	-0.85522	-9.78607	1.49756e-20	8.39337e-20	35.4908
SV2B	-2.33771	-5.10568	-9.78498	1.5108e-20	8.46293e-20	35.4821
SERPINA5	-1.98471	2.63769	-9.78409	1.52174e-20	8.52191e-20	35.475
GSTM4	-1.10548	0.209647	-9.77775	1.60169e-20	8.95739e-20	35.4243
PGCP	-1.43517	5.50721	-9.77547	1.63156e-20	9.11452e-20	35.406
MYH15	-1.72235	-3.19539	-9.7724	1.67242e-20	9.33516e-20	35.3815
RFPL1S	-1.44286	-5.22053	-9.77063	1.69662e-20	9.46252e-20	35.3673
C10orf128	-1.98478	-2.49609	-9.76988	1.70683e-20	9.51692e-20	35.3614
ROR1	-2.29451	2.9402	-9.76977	1.70843e-20	9.52324e-20	35.3604
MFSD7	-1.71501	0.752157	-9.75945	1.85686e-20	1.03388e-19	35.278
CAMK2N1	-1.14409	6.82003	-9.75893	1.86461e-20	1.03769e-19	35.2738
EPHA10	-1.46319	-0.291468	-9.75854	1.87057e-20	1.04072e-19	35.2707
ROS1	-2.23577	-5.89582	-9.75511	1.92305e-20	1.06934e-19	35.2433
C1orf70	-1.47754	-6.51998	-9.75284	1.95859e-20	1.08823e-19	35.2251
RGL1	-1.38922	-1.66383	-9.74963	2.00998e-20	1.11617e-19	35.1995
NCAN	-1.18769	-7.9274	-9.74867	2.02564e-20	1.12457e-19	35.1918
KL	-2.10427	-3.24758	-9.7467	2.05803e-20	1.14224e-19	35.1761
APBB1	-1.73916	2.41565	-9.74615	2.06716e-20	1.14668e-19	35.1717
AHRR	-1.58294	2.39915	-9.74113	2.15255e-20	1.19309e-19	35.1317
TBC1D9	-1.58093	-0.645157	-9.74009	2.17062e-20	1.20278e-19	35.1234
CDH22	-1.81565	-1.96827	-9.73916	2.18703e-20	1.21078e-19	35.1159
WBSCR17	-2.11458	-5.98713	-9.73914	2.18742e-20	1.21078e-19	35.1158
ZC3H12C	-1.84167	-2.38239	-9.73569	2.24907e-20	1.24323e-19	35.0882
CDHR2	-2.80855	7.14103	-9.73271	2.30378e-20	1.2721e-19	35.0645
CCR9	-1.65893	-2.55792	-9.73061	2.34301e-20	1.29272e-19	35.0477
PDLIM3	-2.17173	6.52798	-9.73037	2.3476e-20	1.2949e-19	35.0458
TMEM61	-2.46444	3.73577	-9.72017	2.54852e-20	1.40346e-19	34.9645
IL6ST	-1.54996	-1.81152	-9.71971	2.55809e-20	1.40836e-19	34.9608
ZEB2	-1.75596	2.63374	-9.7174	2.60606e-20	1.43399e-19	34.9424
PNCK	-3.21027	-3.90623	-9.71669	2.62109e-20	1.44111e-19	34.9367
ATP8A2	-1.34762	-7.2598	-9.71629	2.62934e-20	1.44526e-19	34.9336
HSBP1L1	-1.0192	1.67457	-9.71488	2.65944e-20	1.46141e-19	34.9223
UST	-2.16276	-1.52201	-9.70746	2.82311e-20	1.54887e-19	34.8632
TOX	-2.26118	5.55099	-9.70477	2.88482e-20	1.58103e-19	34.8418
SLC1A1	-2.00253	-1.32734	-9.70226	2.94378e-20	1.61248e-19	34.8218
FLI1	-1.51999	0.460902	-9.69189	3.1997e-20	1.75079e-19	34.7393
CR2	-3.7462	0.509621	-9.68993	3.25038e-20	1.77805e-19	34.7237
CCNJL	-1.74056	3.3022	-9.68685	3.33197e-20	1.82171e-19	34.6992
COL28A1	-2.41196	3.3136	-9.68138	3.4814e-20	1.90139e-19	34.6557
CSMD1	-1.41391	-7.73055	-9.68081	3.49756e-20	1.90971e-19	34.6512
EBI3	-1.83107	-1.21065	-9.67943	3.5365e-20	1.93045e-19	34.6402
MSRB3	-2.18478	-0.129911	-9.6787	3.55714e-20	1.9412e-19	34.6344
ADAMTSL4	-1.71747	-3.23942	-9.67436	3.68346e-20	2.00907e-19	34.5999
KIAA0748	-1.94224	2.89404	-9.67333	3.71411e-20	2.02525e-19	34.5917
BTK	-2.09981	-4.14383	-9.6713	3.7749e-20	2.05785e-19	34.5756
ZNF491	-1.13261	-7.6975	-9.66751	3.89169e-20	2.12095e-19	34.5455
ADAMTS1	-1.76868	2.6367	-9.66628	3.93007e-20	2.14017e-19	34.5358
C20orf160	-1.27187	-4.10417	-9.66543	3.95694e-20	2.15423e-19	34.529
COLEC12	-2.53146	-1.72149	-9.66164	4.07926e-20	2.21906e-19	34.4989
LOC134466	-1.68612	-5.65416	-9.65662	4.24696e-20	2.30967e-19	34.459
MEP1A	-3.01674	4.51423	-9.65462	4.31534e-20	2.34624e-19	34.4432
RNASE1	-1.54148	7.3572	-9.65203	4.406e-20	2.3949e-19	34.4226
OMG	-1.00295	-1.1902	-9.65106	4.44041e-20	2.41232e-19	34.4149
FCGRT	-1.26127	3.92814	-9.64664	4.6005e-20	2.49731e-19	34.3799
LOC284578	-2.12552	-6.60157	-9.64459	4.67659e-20	2.53794e-19	34.3636
ESR1	-1.86759	-0.523381	-9.64434	4.68605e-20	2.54173e-19	34.3616
CAP2	-1.8492	4.54501	-9.64251	4.75535e-20	2.57728e-19	34.3471
ZNF492	-2.05086	-1.05022	-9.6408	4.82087e-20	2.61072e-19	34.3336
MOSC2	-1.31772	5.57545	-9.63476	5.05969e-20	2.73861e-19	34.2857
FEZ1	-1.61595	-0.906328	-9.63226	5.16199e-20	2.79251e-19	34.2659
ELMOD1	-1.26371	-7.44257	-9.63098	5.21529e-20	2.81985e-19	34.2557
CRABP1	-2.82353	0.446661	-9.63055	5.23315e-20	2.82877e-19	34.2523
NKAPL	-1.44947	-2.11453	-9.62702	5.38314e-20	2.90678e-19	34.2244
LOC158376	-1.06034	-6.65866	-9.6158	5.88894e-20	3.17406e-19	34.1355
CPA3	-2.89143	0.479202	-9.61492	5.93065e-20	3.1957e-19	34.1285
VIPR2	-2.38007	-5.8519	-9.61371	5.98817e-20	3.22585e-19	34.119
TMEM156	-1.82348	-4.20378	-9.60774	6.28061e-20	3.38161e-19	34.0718
LOC100128239	-1.5418	-5.81876	-9.60543	6.39782e-20	3.44382e-19	34.0535
MT1L	-2.11692	0.688088	-9.6042	6.46132e-20	3.47618e-19	34.0437
PNMA1	-1.20305	6.94822	-9.60171	6.59086e-20	3.54401e-19	34.024
NEURL	-2.77078	0.424845	-9.59779	6.8005e-20	3.65483e-19	33.9931
NGFR	-2.57051	-3.33846	-9.59733	6.82585e-20	3.66749e-19	33.9894
EVI2B	-1.84387	5.91934	-9.59503	6.952e-20	3.73136e-19	33.9713
NEFH	-1.75205	-1.12154	-9.59353	7.03594e-20	3.77543e-19	33.9594
SCN1B	-1.52829	-5.46986	-9.58543	7.50623e-20	4.01623e-19	33.8953
SERINC2	-1.05635	1.99582	-9.58112	7.76871e-20	4.15451e-19	33.8613
EEF1A2	-2.76849	-4.52515	-9.57968	7.85858e-20	4.20038e-19	33.8499
TTC28	-1.55787	0.241957	-9.57533	8.13597e-20	4.34525e-19	33.8156
P2RY2	-1.22564	-0.884521	-9.57077	8.43735e-20	4.50036e-19	33.7796
SIGLEC1	-2.45553	3.87107	-9.57052	8.45405e-20	4.5081e-19	33.7777
SLC22A4	-1.53196	3.50358	-9.56743	8.66493e-20	4.61455e-19	33.7533
NAT2	-2.26816	4.01567	-9.56689	8.70261e-20	4.63222e-19	33.749
PTPRR	-2.28869	-3.64426	-9.55023	9.93778e-20	5.27872e-19	33.6177
POU2AF1	-2.89286	0.544419	-9.54927	1.00141e-19	5.31788e-19	33.6101
HAND1	-3.76474	2.35228	-9.54691	1.02036e-19	5.41571e-19	33.5915
IL10RA	-1.81507	6.09759	-9.54684	1.02097e-19	5.41756e-19	33.5909
ZNF471	-2.08293	-3.08343	-9.54476	1.03805e-19	5.50674e-19	33.5745
GYPE	-1.22461	-7.40867	-9.54412	1.0433e-19	5.53174e-19	33.5695
SNCB	-1.17911	-6.43077	-9.54157	1.06475e-19	5.64255e-19	33.5494
CCDC85A	-1.81361	-4.45425	-9.53785	1.09669e-19	5.80732e-19	33.5201
ELOVL4	-1.58383	-5.94778	-9.53453	1.12607e-19	5.95679e-19	33.494
NRG1	-2.28007	2.85479	-9.52577	1.20726e-19	6.37475e-19	33.4251
ITPR1	-1.51459	-1.27393	-9.52508	1.21396e-19	6.40847e-19	33.4196
JAM3	-1.38274	-2.89928	-9.52164	1.24757e-19	6.58421e-19	33.3926
LRRC26	-2.96113	-3.72064	-9.51845	1.27959e-19	6.748e-19	33.3675
PARK2	-1.68441	-3.17937	-9.51259	1.34055e-19	7.06224e-19	33.3215
EPHX1	-1.15061	-0.0388757	-9.51224	1.34433e-19	7.0803e-19	33.3187
RARRES2	-1.57855	-2.31848	-9.51079	1.35987e-19	7.16031e-19	33.3073
HPCAL4	-1.44928	-6.89072	-9.50973	1.37143e-19	7.21564e-19	33.2989
ZNF568	-1.70522	-3.13829	-9.50834	1.38665e-19	7.29383e-19	33.288
FAM123C	-2.16359	-6.19549	-9.50532	1.42025e-19	7.46102e-19	33.2643
RAB3C	-1.55005	-1.51551	-9.50025	1.47865e-19	7.75592e-19	33.2245
GRAMD1C	-1.43377	3.153	-9.49813	1.50368e-19	7.88318e-19	33.2078
C13orf36	-1.35124	-7.94518	-9.49006	1.60311e-19	8.39376e-19	33.1445
MS4A6A	-1.8607	6.44557	-9.48444	1.67615e-19	8.76501e-19	33.1004
IGF1	-2.54033	-2.82825	-9.48417	1.67978e-19	8.78176e-19	33.0983
ABHD8	-1.07163	2.07666	-9.47903	1.74961e-19	9.13749e-19	33.058
TCEA3	-1.79893	7.87219	-9.47849	1.75709e-19	9.17421e-19	33.0537
POU2F2	-1.74941	2.81734	-9.47686	1.78005e-19	9.29173e-19	33.0409
FABP1	-3.90687	4.70464	-9.46591	1.94123e-19	1.01202e-18	32.9551
AKAP7	-1.58781	-1.79551	-9.46126	2.01405e-19	1.04866e-18	32.9187
NPY5R	-1.65501	-0.491384	-9.45811	2.06491e-19	1.07432e-18	32.894
EBF1	-1.57101	-3.86809	-9.45004	2.20108e-19	1.14314e-18	32.8309
GAS7	-1.83936	1.58106	-9.44747	2.24631e-19	1.16604e-18	32.8107
PCSK1N	-3.35231	-3.42841	-9.43876	2.40642e-19	1.24757e-18	32.7426
ASAM	-2.37094	-0.60744	-9.43039	2.57093e-19	1.33151e-18	32.6772
TIFAB	-1.86008	-4.05482	-9.42558	2.67051e-19	1.38239e-18	32.6396
C6	-2.16038	-1.65839	-9.42259	2.73439e-19	1.41403e-18	32.6162
TAGAP	-1.90164	-2.63763	-9.41825	2.82965e-19	1.46219e-18	32.5823
ITGB7	-1.72887	5.69841	-9.41785	2.83864e-19	1.46646e-18	32.5792
DEFB1	-2.72356	-3.60074	-9.415	2.90318e-19	1.49943e-18	32.557
AKR1C1	-1.71237	-1.37565	-9.4048	3.14654e-19	1.62226e-18	32.4773
GIMAP4	-1.49435	0.418559	-9.40298	3.19194e-19	1.64484e-18	32.4631
LOC254559	-1.58726	-4.94789	-9.40276	3.19753e-19	1.64731e-18	32.4614
SFTPD	-1.32619	-6.47202	-9.40268	3.19944e-19	1.64788e-18	32.4608
PTPRN	-2.56112	-8.78341	-9.39709	3.34361e-19	1.72127e-18	32.4172
CACNA1A	-1.56699	0.912217	-9.3941	3.42339e-19	1.7619e-18	32.3939
SGK2	-2.12877	1.29991	-9.39146	3.49531e-19	1.79756e-18	32.3733
CDC42EP5	-1.4499	8.4651	-9.38734	3.61065e-19	1.85409e-18	32.3412
ARHGEF6	-1.57888	-1.14669	-9.38639	3.63782e-19	1.86758e-18	32.3338
CASQ1	-1.65867	-6.87507	-9.37778	3.89299e-19	1.99608e-18	32.2667
P2RY13	-2.02543	-3.45317	-9.37064	4.11787e-19	2.10981e-18	32.2112
DENND1B	-1.03222	-1.44352	-9.36619	4.26459e-19	2.1828e-18	32.1766
GALNT13	-2.11056	-5.17753	-9.36361	4.35211e-19	2.22593e-18	32.1565
ZNF582	-1.61303	-5.41842	-9.36278	4.38049e-19	2.23989e-18	32.15
SERTAD4	-2.01257	-4.73982	-9.35086	4.81076e-19	2.45257e-18	32.0574
CYSLTR2	-1.77693	1.12769	-9.34562	5.01301e-19	2.55377e-18	32.0166
GPR17	-1.80864	1.73891	-9.34233	5.14435e-19	2.61743e-18	31.991
CLDN19	-1.06182	-6.88011	-9.33944	5.26239e-19	2.67617e-18	31.9686
KLHDC8B	-1.29861	3.64695	-9.33431	5.47841e-19	2.78327e-18	31.9288
GABRB3	-3.17304	-3.3042	-9.33428	5.48006e-19	2.78341e-18	31.9285
C1QA	-1.80682	-1.03894	-9.33407	5.48883e-19	2.78718e-18	31.9269
LRRC31	-1.91099	6.75572	-9.33108	5.61901e-19	2.85117e-18	31.9037
TNNI3K	-1.61518	-1.48295	-9.33034	5.6518e-19	2.86639e-18	31.898
AP3B2	-2.31154	1.10011	-9.32957	5.68605e-19	2.88305e-18	31.892
MAP2	-1.87783	-4.87774	-9.32659	5.82075e-19	2.95062e-18	31.8689
LOC728264	-2.08735	2.04858	-9.32646	5.82678e-19	2.95295e-18	31.8678
FLJ35024	-1.57491	-7.00513	-9.32605	5.84538e-19	2.96164e-18	31.8647
FBLN1	-2.19371	8.59994	-9.32375	5.95189e-19	3.01337e-18	31.8468
RASL12	-1.49656	-2.10416	-9.32249	6.01102e-19	3.04181e-18	31.837
PRELP	-3.00335	-0.142583	-9.3179	6.23116e-19	3.1501e-18	31.8015
GCET2	-1.30549	2.81423	-9.31461	6.39383e-19	3.23154e-18	31.776
MGC29506	-3.12152	4.03795	-9.30856	6.7044e-19	3.38518e-18	31.7291
NEO1	-1.13293	6.45231	-9.30826	6.72019e-19	3.39231e-18	31.7267
ALAS2	-1.42405	-3.81625	-9.30456	6.91784e-19	3.49037e-18	31.6981
CXorf21	-1.74212	-1.64923	-9.30429	6.93263e-19	3.49698e-18	31.696
KBTBD11	-1.26502	0.613439	-9.30398	6.94946e-19	3.50374e-18	31.6936
PRICKLE2	-1.65665	-3.01982	-9.30305	6.99992e-19	3.52659e-18	31.6864
GPC5	-1.82616	-2.07349	-9.3009	7.11875e-19	3.58469e-18	31.6698
NCF1B	-1.98568	-2.25463	-9.29902	7.22455e-19	3.63619e-18	31.6552
HBA1	-3.67044	-2.44583	-9.29502	7.45409e-19	3.74529e-18	31.6242
ISX	-2.99618	1.83325	-9.28651	7.96781e-19	3.99461e-18	31.5583
FAIM3	-1.8008	4.92393	-9.28638	7.97565e-19	3.99756e-18	31.5573
MGAT5B	-1.41437	-0.750942	-9.28602	7.99808e-19	4.00685e-18	31.5546
EVI2A	-1.831	-2.96157	-9.28288	8.19712e-19	4.1036e-18	31.5303
CLEC4GP1	-1.11292	-8.76915	-9.28194	8.25775e-19	4.13189e-18	31.523
ZNF135	-1.69326	-3.07682	-9.27458	8.74695e-19	4.37561e-18	31.4661
P2RY10	-2.0279	-4.03461	-9.27353	8.81894e-19	4.40964e-18	31.4579
HMGCS2	-3.74728	7.07374	-9.27352	8.81927e-19	4.40964e-18	31.4579
FHL5	-1.62645	-1.85017	-9.27094	8.99912e-19	4.49737e-18	31.4379
MAP1LC3C	-1.17057	-6.45465	-9.26833	9.18429e-19	4.58768e-18	31.4178
CDK20	-1.24386	1.04612	-9.26386	9.51099e-19	4.7474e-18	31.3832
ADORA2A	-1.19897	-1.76954	-9.26336	9.54793e-19	4.76468e-18	31.3794
PLEKHO1	-1.4178	-0.153654	-9.25829	9.93374e-19	4.9536e-18	31.3402
DACH2	-1.19999	0.276057	-9.25686	1.00447e-18	5.00772e-18	31.3292
TCEAL6	-1.32073	2.3187	-9.25659	1.00664e-18	5.01733e-18	31.3271
MS4A4A	-2.12554	-1.49876	-9.25507	1.01861e-18	5.07576e-18	31.3154
COLEC11	-1.70716	0.581017	-9.24805	1.07599e-18	5.35518e-18	31.2612
CYP8B1	-1.11537	-6.14709	-9.24245	1.12403e-18	5.59158e-18	31.218
RYR1	-1.86997	1.4612	-9.24119	1.13512e-18	5.644e-18	31.2083
C16orf45	-1.47911	-0.110547	-9.23947	1.15049e-18	5.71901e-18	31.195
LGALS9B	-3.0582	1.17731	-9.23914	1.15344e-18	5.73228e-18	31.1925
CRTAC1	-2.51546	-5.75412	-9.23501	1.19118e-18	5.91128e-18	31.1607
BCL2L15	-1.49317	5.83428	-9.23354	1.20488e-18	5.97638e-18	31.1493
CCNA1	-1.10091	-0.141892	-9.22583	1.27953e-18	6.33745e-18	31.0899
USP51	-1.4931	-6.51812	-9.21992	1.33982e-18	6.62646e-18	31.0444
HHIP	-2.3676	-2.87382	-9.21929	1.34634e-18	6.65711e-18	31.0396
GP9	-1.19913	-5.53741	-9.21679	1.37286e-18	6.78497e-18	31.0203
NCF1	-2.14421	4.60478	-9.21355	1.40784e-18	6.95286e-18	30.9954
DOCK10	-1.79289	-2.81105	-9.21263	1.41795e-18	7.00109e-18	30.9883
LOC441869	-1.7985	-5.40704	-9.2104	1.44284e-18	7.11713e-18	30.9711
KCTD12	-1.81921	0.362771	-9.20362	1.52091e-18	7.49864e-18	30.919
C15orf59	-1.7344	2.13658	-9.20001	1.56424e-18	7.70854e-18	30.8912
C5orf52	-1.52766	-2.56508	-9.19927	1.57327e-18	7.75122e-18	30.8855
SPTBN4	-1.80115	0.446119	-9.19499	1.62647e-18	8.00752e-18	30.8527
FRRS1	-1.51507	-0.276201	-9.18546	1.75151e-18	8.61489e-18	30.7794
WBSCR26	-1.77447	-2.9783	-9.18524	1.75456e-18	8.62783e-18	30.7777
ME2	-1.02413	1.11375	-9.17789	1.85761e-18	9.12909e-18	30.7213
CYP4F12	-1.75695	2.9548	-9.17787	1.85784e-18	9.12909e-18	30.7212
KCNH1	-1.33377	-3.83061	-9.17243	1.93796e-18	9.51371e-18	30.6794
ITGA7	-1.73721	-2.01884	-9.16855	1.99719e-18	9.79746e-18	30.6496
CD180	-1.91825	2.08095	-9.16403	2.06844e-18	1.01421e-17	30.615
SLC47A1	-1.77199	-4.04237	-9.16134	2.11212e-18	1.03514e-17	30.5943
ANO7	-2.17316	2.31233	-9.15161	2.27757e-18	1.1133e-17	30.5198
NAPSB	-2.13047	-0.823724	-9.14921	2.32021e-18	1.13387e-17	30.5014
SPG20	-1.6618	1.46591	-9.14866	2.33026e-18	1.13851e-17	30.4972
NDRG4	-1.53758	-3.11067	-9.14691	2.36209e-18	1.15324e-17	30.4837
FOXF1	-1.51665	-1.34543	-9.1424	2.44605e-18	1.19338e-17	30.4492
CMKLR1	-1.83307	3.34975	-9.14043	2.48362e-18	1.21114e-17	30.4341
PBX1	-1.43303	0.394699	-9.12588	2.77961e-18	1.35322e-17	30.3228
ECH1	-1.03491	9.6514	-9.12458	2.80771e-18	1.36658e-17	30.3129
NTN4	-1.2957	-1.99646	-9.12144	2.87672e-18	1.39951e-17	30.2889
RGS18	-1.78309	-3.82737	-9.12079	2.8911e-18	1.4055e-17	30.2839
C17orf44	-1.11815	4.38862	-9.11584	3.00386e-18	1.4579e-17	30.2461
SLC8A1	-1.38855	-3.11609	-9.11466	3.03148e-18	1.46992e-17	30.2371
KLK1	-2.15308	1.06042	-9.10955	3.15352e-18	1.52801e-17	30.1981
MS4A7	-1.88728	-1.17455	-9.10306	3.31575e-18	1.60472e-17	30.1485
IRX6	-1.24071	-1.90896	-9.09768	3.45619e-18	1.66993e-17	30.1075
FAM114A1	-1.09352	6.69658	-9.09522	3.52247e-18	1.70156e-17	30.0887
TTR	-2.50347	-5.87624	-9.09356	3.56787e-18	1.72309e-17	30.076
SGSM1	-1.94688	-4.11583	-9.09127	3.6316e-18	1.75221e-17	30.0585
MPPED2	-1.78271	-7.73306	-9.07349	4.16523e-18	2.00075e-17	29.923
CD14	-1.51668	1.47194	-9.07162	4.22568e-18	2.02932e-17	29.9087
2018-09-06	-1.06076	0.0599563	-9.07099	4.24609e-18	2.03864e-17	29.904
HRASLS5	-2.33636	-6.9251	-9.06955	4.29337e-18	2.06038e-17	29.893
ADRA2A	-2.20268	6.36033	-9.05896	4.6583e-18	2.23081e-17	29.8124
C14orf49	-1.53184	-5.72676	-9.05129	4.94147e-18	2.36366e-17	29.7541
ENPP2	-1.95028	-2.62813	-9.04667	5.12024e-18	2.44632e-17	29.7189
AR	-1.95905	1.61886	-9.04024	5.37993e-18	2.5698e-17	29.67
FOXD2	-1.42412	-0.0213254	-9.03899	5.43161e-18	2.59328e-17	29.6606
CDO1	-2.12757	-5.39955	-9.03124	5.76487e-18	2.74983e-17	29.6017
PDE1A	-1.97451	-2.25168	-9.03082	5.78346e-18	2.75806e-17	29.5986
SORBS1	-1.75458	4.80593	-9.02896	5.86682e-18	2.79586e-17	29.5844
ADAMTS8	-2.12853	-2.49611	-9.02186	6.19553e-18	2.94772e-17	29.5305
CD207	-1.92919	-2.13418	-9.02089	6.24208e-18	2.96803e-17	29.5231
PPYR1	-1.92185	3.25103	-9.01632	6.46464e-18	3.0722e-17	29.4885
VSIG4	-2.28642	1.60995	-9.01124	6.72147e-18	3.18982e-17	29.45
FAM22A	-1.13853	-4.33896	-9.01049	6.7604e-18	3.20756e-17	29.4443
OLFML1	-1.5402	5.37222	-9.01029	6.77083e-18	3.21176e-17	29.4428
LOC100216001	-1.86894	1.67234	-9.0079	6.89614e-18	3.2697e-17	29.4246
PLA2G5	-2.16009	-1.29548	-9.00744	6.92034e-18	3.28041e-17	29.4212
FAM55A	-3.59042	0.6066	-9.00481	7.0611e-18	3.34482e-17	29.4013
UGT3A2	-1.18268	-0.818528	-9.00062	7.29178e-18	3.45249e-17	29.3695
MATN4	-1.05309	-6.27748	-8.99393	7.67555e-18	3.63002e-17	29.3188
TEK	-1.59164	5.45926	-8.99024	7.89541e-18	3.73142e-17	29.2909
C9orf24	-1.86719	-5.52655	-8.98684	8.10375e-18	3.82724e-17	29.2652
MAP2K6	-1.09291	7.17354	-8.98665	8.11539e-18	3.83102e-17	29.2637
DCLK2	-1.58236	-4.7709	-8.98401	8.28148e-18	3.90668e-17	29.2437
CCL21	-3.27667	1.27562	-8.98239	8.38434e-18	3.9543e-17	29.2315
DMD	-1.97588	-1.33854	-8.97928	8.5866e-18	4.04783e-17	29.208
NRARP	-1.10567	0.375221	-8.97776	8.68668e-18	4.09313e-17	29.1965
EFNA5	-2.32672	-3.51873	-8.96109	9.86812e-18	4.63598e-17	29.0705
KRBA2	-1.12589	0.539766	-8.95999	9.9517e-18	4.67204e-17	29.0622
TSPYL5	-1.65168	1.33819	-8.9518	1.05939e-17	4.96788e-17	29.0004
ANKRD20A3	-1.49358	-5.32749	-8.95156	1.06134e-17	4.97587e-17	28.9985
RBMS3	-1.55694	-4.45844	-8.94941	1.07894e-17	5.05489e-17	28.9823
DST	-1.06759	1.83081	-8.94706	1.0984e-17	5.14492e-17	28.9646
SLC2A5	-1.89939	3.26219	-8.94691	1.09973e-17	5.14998e-17	28.9634
SLITRK4	-1.7516	0.735539	-8.94343	1.12933e-17	5.28378e-17	28.9372
NDRG1	-1.20142	4.55626	-8.94136	1.14732e-17	5.36672e-17	28.9216
[truncated: 1,219 more rows]
